# Supplementary material for: Microwave-mediated stereocontrolled annulations of diazo(aryl)methyl(diaryl)phosphine oxides with pyridinium 1,4-zwitterionic thiolates
Source: Royal Society of Chemistry journal article supplement (doi:10.1039/d2cc05483c), 2022-12-01
Supplement: d2cc05483c1.pdf [file d2cc05483c1.pdf]

## Supporting Information

# Microwave-mediated stereocontrolled annulations of diazo(aryl)methyl(diaryl)phosphine oxides with pyridinium 1,4- zwitterionic thiolates

Simin Sun, Yuliang Wei, Jiayi Xu\*

State Key Laboratory of Chemical Resource Engineering, Department of Organic Chemistry,  
College of Chemistry, Beijing University of Chemical Technology, Beijing 100029, People's  
Republic of China. E-mail: [jxxu@mail.buct.edu.cn](mailto:jxxu@mail.buct.edu.cn)

## Contents

|                                                                                                                                  |     |
|----------------------------------------------------------------------------------------------------------------------------------|-----|
| 1. Experimental.....                                                                                                             | S2  |
| 1.1. General Information.....                                                                                                    | S2  |
| 1.2. Synthesis of Diazo Compounds <b>1</b> .....                                                                                 | S2  |
| 1.3. Synthesis of Pyridinium 1,4-zwitterionic Thiolates <b>2</b> .....                                                           | S4  |
| 1.4. [3+3] Annulation of Diazo Compounds <b>1</b> and Pyridinium 1,4-zwitterionic Thiolates <b>2</b> .....                       | S6  |
| 1.5. ([1+5]-1) Annulation of Diazo Compounds <b>1</b> and Pyridinium 1,4-zwitterionic Thiolates <b>2</b> .....                   | S13 |
| 1.6. Gram-scaled Synthesis of <b>3aa</b> and <b>4ag</b> .....                                                                    | S18 |
| 1.7 Applications.....                                                                                                            | S19 |
| 2. Control experiments.....                                                                                                      | S22 |
| 3. References.....                                                                                                               | S26 |
| 4. Copies of <sup>1</sup> H, <sup>13</sup> C, <sup>31</sup> P, <sup>19</sup> F NMR, and HRMS Spectra of Products.....            | S27 |
| 4.1. Copies of <sup>1</sup> H and <sup>31</sup> P NMR Spectra of Diazo Compounds <b>1</b> .....                                  | S27 |
| 4.2. Copies of <sup>1</sup> H, <sup>13</sup> C NMR and HRMS Spectra of Pyridinium 1,4-zwitterionic Thiolates <b>2</b> .....      | S28 |
| 4.3. Copies of <sup>1</sup> H, <sup>31</sup> P, <sup>13</sup> C, <sup>19</sup> F NMR and HRMS Spectra of Products <b>3</b> ..... | S33 |
| 4.4. Copies of <sup>1</sup> H, <sup>13</sup> C, <sup>19</sup> F NMR and HRMS Spectra of Products <b>4</b> .....                  | S60 |
| 4.5. Copies of <sup>1</sup> H, <sup>13</sup> C NMR and HRMS Spectra of Applications.....                                         | S81 |
| 4.6. Copies of <sup>1</sup> H, <sup>13</sup> C NMR and HRMS Spectra of Control Experiments.....                                  | S87 |
| 5. X-Ray Crystallographic Data of <b>3aa</b> and <b>4ag</b> .....                                                                | S89 |
| 5.1. X-Ray Crystallographic Data of <b>3aa</b> .....                                                                             | S89 |
| 5.2. X-Ray Crystallographic Data of <b>4ag</b> .....                                                                             | S91 |

# 1. Experimental

## 1.1. General Information

Microwave reactions were performed using a commercial CEM SP microwave reactor with an external IR sensor and in a closed reaction vessel. Unless otherwise noted, all materials were purchased from commercial suppliers. MeCN, DCE, and DCM were refluxed over CaH<sub>2</sub> and freshly distilled prior to use. THF and toluene were refluxed over sodium with benzophenone as an indicator and freshly distilled prior to use. Flash column chromatography was performed using silica gel (normal phase, 200–300 mesh) from Branch of Qingdao Haiyang Chemicals. The thin layer chromatography silica gel preparative plates were purchased from Anhui Liangchen Silicon Material Co. Ltd. Petroleum ether used for column chromatography was 60–90 °C fraction, and the removal of residue solvent was accomplished under rotovap with repeated azeotrope with chloroform, and then evaporation under vacuum (< 1 mmHg pressure). Reactions were monitored by thin-layer chromatography on silica gel 60–F254 coated 0.2 mm plates from Institute of Yantai Chemical Industry. The plates were visualized under UV light. <sup>1</sup>H (400 MHz), <sup>13</sup>C (101 MHz), <sup>31</sup>P (162 MHz), and <sup>19</sup>F NMR (376 MHz) spectra were recorded on a Bruker 400 NMR spectrometer usually with TMS as an internal standard for <sup>1</sup>H NMR, CDCl<sub>3</sub> as an internal standard (77.16) for <sup>13</sup>C NMR, 85% H<sub>3</sub>PO<sub>4</sub> as an external standard (0.0) for <sup>31</sup>P NMR, and CF<sub>3</sub>CO<sub>2</sub>H as an external standard (-76.55) for <sup>19</sup>F NMR in CDCl<sub>3</sub> solution and the chemical shifts ( $\delta$ ) were reported in parts per million (ppm). HRMS measurements were carried out on an LC/MSD TOF mass spectrometer. Melting points were obtained on a melting point apparatus and are uncorrected.

## 1.2. Synthesis of Diazo Compounds 1

### General Procedure for the Synthesis of Diazo(aryl)methyl(diaryl)phosphine Oxides 1a–1i

Synthesis of diazo(aryl)methyl(diaryl)phosphine oxides **1a–1i** refers to the known literature (Scheme S1).<sup>1-3</sup> To a 100 mL flask were added benzaldehyde (4.24 g, 40 mmol) and 28% ammonia (40 mL). The mixture was refluxed in an oil bath overnight. After cooling to room temperature, the reaction mixture was filtered through a Buchner funnel under reduced pressure to afford colorless crystals **10** after washing with a small amount of petroleum ether (60–90 °C fraction).

To a solution of the colorless crystals **10** (5 mmol, 1.50 g) in toluene (40 mL) in a 100 mL flask was added diphenylphosphine oxide (10 mmol, 2.02 g). The resulting solution was stirred at room temperature for 20 h. White precipitates appeared. After filtration through a Buchner funnel under reduced pressure and washing several times with petroleum ether, colorless crystals **11** were obtained.

Crystals **11** were further dissolved in 40 mL of tetrahydrofuran in a 100 mL flask. After addition of *p*-toluenesulfonic acid hydrate (12 mmol, 2.28 g), the resulting mixture was stirred at room temperature for 5 h. White solid precipitates were observed. After filtration and washing several times with a small amount of tetrahydrofuran, tosylate of **12** was obtained as colorless crystals and directly added into a 100 mL flask.

After addition of 30 mL of 15% ammonia the solution was stirred at room temperature for 1 h and was extracted with 3×20 mL of chloroform. The combined organic phases were dried over anhydrous sodium sulfate and concentrated to 30 mL with a rotary evaporator. After addition of isoamyl nitrite (12 mmol, 1.44 g) and glacial acetic acid (5 mmol, 0.30 g), the solution was refluxed for 1 h. After cooling

to room temperature, the reaction mixture was washed with 2×20 mL of saturated aqueous sodium bicarbonate solution and 20 mL of saturated brine. The organic phase was dried over anhydrous sodium sulfate and concentrated to give a residue, which was purified by silica gel column chromatography with petroleum ether and ethyl acetate (PE:EA = 4:1, v/v) as eluent to afford diazo phosphine oxide **1a**. In addition, it can also be recrystallized from a mixture of ethyl acetate and petroleum ether. Other diazo phosphine oxides **1b–1i** were synthesized as well according to the above experimental procedure. Their analytic data are identical to those in our previous report.<sup>1-3</sup> **1j** refers to our previous report.<sup>3</sup>

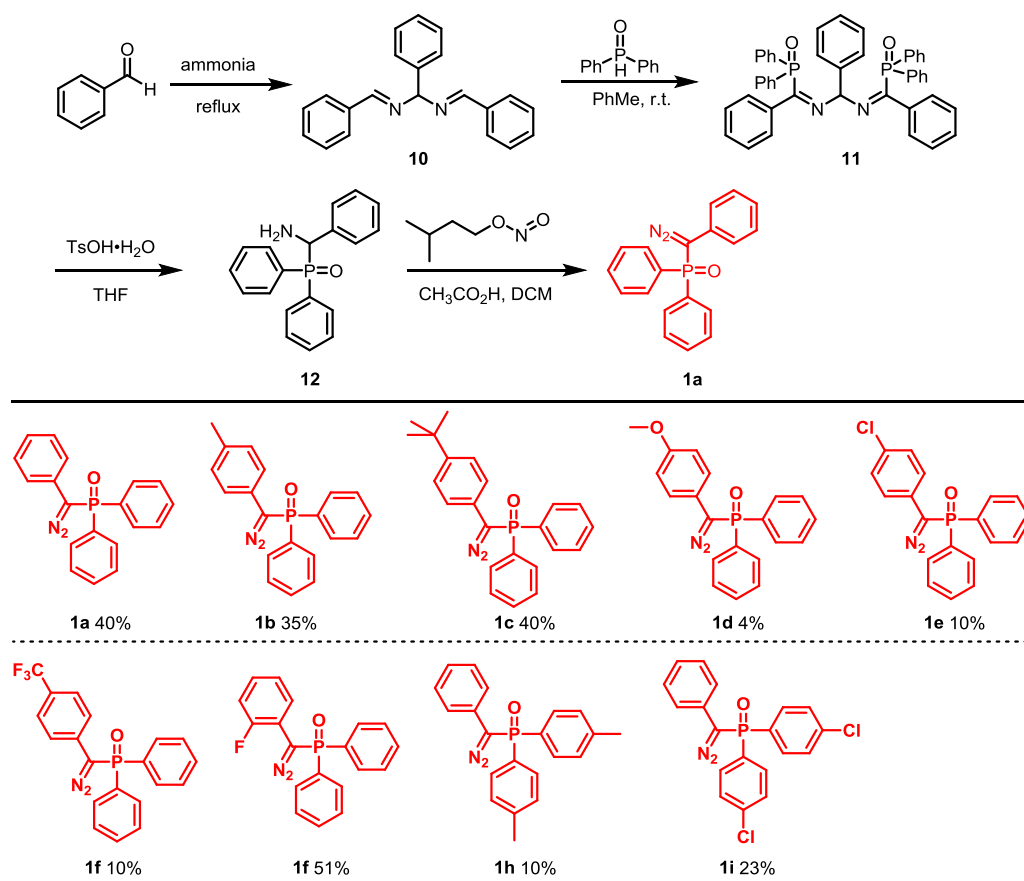

**Scheme S1.** Synthesis of diazophosphine oxides **1a–1i**.

|                                                                                                                                                                                                                                                                                                                                                                                                                                                                                                                                                                                                                                                      |
|------------------------------------------------------------------------------------------------------------------------------------------------------------------------------------------------------------------------------------------------------------------------------------------------------------------------------------------------------------------------------------------------------------------------------------------------------------------------------------------------------------------------------------------------------------------------------------------------------------------------------------------------------|
| <p>((4-Chlorophenyl)(diazo)methyl)diphenylphosphine oxide (<b>1e</b>) [CAS: 26321-51-7]</p>                                                                                                                                                                                                                                                                                                                                                                                                                                                                                                                                                          |
| <p>The product was purified by silica gel column chromatography with petroleum ether (60–90°C fraction) and ethyl acetate (PE:EA = 2:1, v/v) as eluent.</p> <p>Colorless crystals, yield 352 mg (10 %), m.p. = 148–152°C. Lit.<sup>2</sup> 152–154 °C. <math>R_f</math> = 0.30 (PE: EA = 2:1, v/v).</p> <p><sup>1</sup>H NMR (400 MHz, CDCl<sub>3</sub>) <math>\delta</math> 7.82–7.77 (m, 4H), 7.58 (td, <math>J</math> = 7.3, 1.6 Hz, 2H), 7.50 (td, <math>J</math> = 7.5, 3.3 Hz, 4H), 7.23 (d, <math>J</math> = 8.7 Hz, 2H), 7.16 (d, <math>J</math> = 8.7 Hz, 2H). <sup>31</sup>P NMR (162 MHz, CDCl<sub>3</sub>) <math>\delta</math> 26.6.</p> |

### 1.3. Synthesis of Pyridinium 1,4-zwitterionic Thiolates **2**

To a 50 mL flask were sequentially added corresponding pyridine **13** (1 mmol), S<sub>8</sub> (0.125 mmol), and corresponding acetylenedicarboxylate **14** (1 mmol) in DCM (5 mL) at 0 °C, then the mixture was stirred for 24 h. After completion, the mixture was filtered and the precipitate was washed with Et<sub>2</sub>O (2 × 5 mL) and EtOH (5 mL) to afford pure pyridinium thioates **2a–2l**.<sup>3,4</sup>

The analytic data of **2a**, **2b**, **2e**, **2g–2i**, and **2k** are identical to those in our previous report.<sup>3</sup>

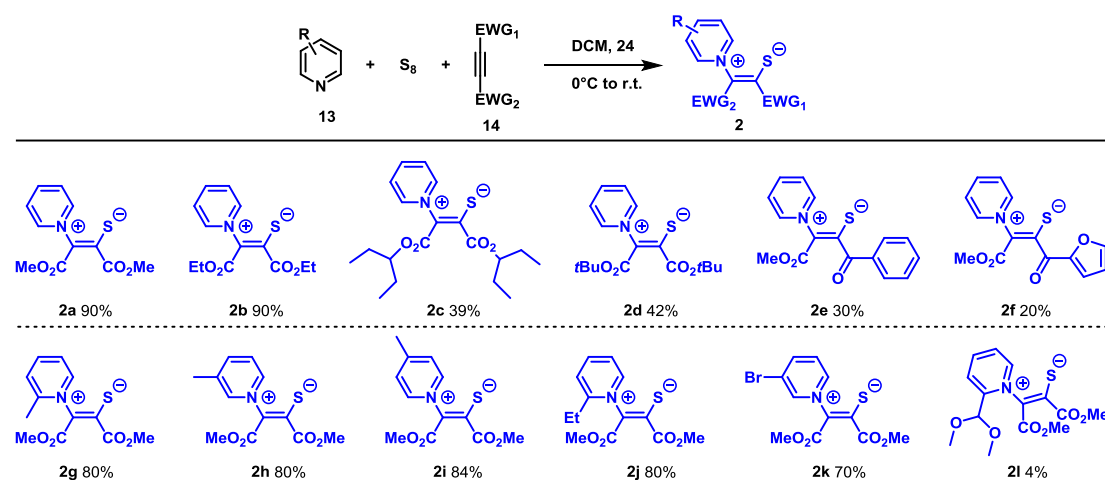

Scheme S2. Synthesis of diazophosphine oxides **2a–2l**.

|                                                                                                                                                                                                                                                                                                                                                                                                                                                                                                                                                                                                                                                                                                                                                                                                   |
|---------------------------------------------------------------------------------------------------------------------------------------------------------------------------------------------------------------------------------------------------------------------------------------------------------------------------------------------------------------------------------------------------------------------------------------------------------------------------------------------------------------------------------------------------------------------------------------------------------------------------------------------------------------------------------------------------------------------------------------------------------------------------------------------------|
| (Z)-1,4-Dioxo-1,4-bis(pentan-3-yloxy)-3-(pyridin-1-ium-1-yl)but-2-ene-2-thiolate ( <b>2c</b> )                                                                                                                                                                                                                                                                                                                                                                                                                                                                                                                                                                                                                                                                                                    |
|                                                                                                                                                                                                                                                                                                                                                                                                                                                                                                                                                                                                                                                                                                                                                                                                   |
| <p>The product was recrystallized with petroleum ether (60–90 °C fraction) and ethyl acetate. Yellow crystals, yield 141 mg (39 %), m.p. = 110–112 °C.</p> <p><sup>1</sup>H NMR (400 MHz, CDCl<sub>3</sub>) δ 8.64 (d, <i>J</i> = 5.10 Hz, 2H), 8.38 (tt, <i>J</i> = 7.81, 1.48 Hz, 1H), 7.93 (dd, <i>J</i> = 7.84, 6.45 Hz, 2H), 4.94 (p, <i>J</i> = 6.03 Hz, 1H), 4.85–4.74 (m, 1H), 1.76 (qd, <i>J</i> = 7.46, 5.94 Hz, 4H), 1.57–1.49 (m, 4H), 1.01 (t, <i>J</i> = 7.48 Hz, 6H), 0.83 (t, <i>J</i> = 7.41 Hz, 6H). <sup>13</sup>C NMR (101 MHz, CDCl<sub>3</sub>) 180.0, 168.9, 160.1, 148.7, 144.4, 127.0, 125.6, 78.2, 78.1, 26.7, 25.7, 9.9, 9.6. HRMS (ESI) calcd for C<sub>19</sub>H<sub>28</sub>NO<sub>4</sub>S<sup>+</sup> [M+H]<sup>+</sup> <i>m/z</i>: 366.1734; found 366.1733.</p> |
| (Z)-1,4-Di-tert-butoxy-1,4-dioxo-3-(pyridin-1-ium-1-yl)but-2-ene-2-thiolate ( <b>2d</b> ) <sup>4</sup> [CAS: 1321889-47-7]                                                                                                                                                                                                                                                                                                                                                                                                                                                                                                                                                                                                                                                                        |
|                                                                                                                                                                                                                                                                                                                                                                                                                                                                                                                                                                                                                                                                                                                                                                                                   |
| <p>The product was recrystallized with petroleum ether (60–90 °C fraction) and ethyl acetate. Yellow crystals, yield 139 mg (42 %), m.p. = 209–210°C. Lit.<sup>4</sup> 240–242°C.</p>                                                                                                                                                                                                                                                                                                                                                                                                                                                                                                                                                                                                             |

**<sup>1</sup>H NMR** (400 MHz, CDCl<sub>3</sub>) δ 8.63 (d, *J* = 5.29 Hz, 2H), 8.34 (t, *J* = 7.83 Hz, 1H), 7.90 (dd, *J* = 7.82, 6.56 Hz, 2H), 1.62 (s, 9H), 1.44 (s, 9H).

(*Z*)-1-(Furan-2-yl)-4-methoxy-1,4-dioxo-3-(pyridin-1-ium-1-yl)but-2-ene-2-thiolate (**2f**)<sup>5</sup> [CAS: 2417676-86-7]

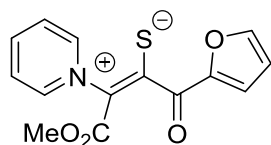

The product was purified by washing with Et<sub>2</sub>O (2 × 5 mL) and EtOH (5 mL).

Brown crystals, yield 60 mg (20 %), m.p. = 186–188°C. Lit.<sup>5</sup> 138–139°C.

**<sup>1</sup>H NMR** (400 MHz, CDCl<sub>3</sub>) δ 8.76 (dd, *J* = 6.6, 1.5 Hz, 2H), 8.41 (t, *J* = 7.8 Hz, 1H), 7.99 (t, *J* = 7.1 Hz, 2H), 7.58 (dd, *J* = 1.7, 0.8 Hz, 1H), 7.26–7.25 (M, 1H), 6.54 (dd, *J* = 3.5, 1.7 Hz, 1H), 3.58 (s, 3H)

(*Z*)-3-(2-Ethylpyridin-1-ium-1-yl)-1,4-dimethoxy-1,4-dioxobut-2-ene-2-thiolate (**2j**)<sup>4</sup> [CAS: 1321889-55-7]

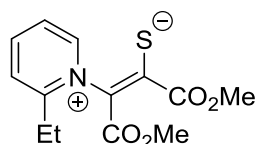

The product was purified by washing with Et<sub>2</sub>O (2 × 5 mL) and EtOH (5 mL).

Brown crystals, yield 224 mg (80 %), m.p. = 182–183°C. Lit.<sup>4</sup> 175–177°C.

**<sup>1</sup>H NMR** (400 MHz, CDCl<sub>3</sub>) δ 8.38–8.32 (m, 2H), 7.86 (d, *J* = 7.7 Hz, 1H), 7.76 (ddd, *J* = 7.7, 6.1, 1.5 Hz, 1H), 3.92 (s, 3H), 3.71 (s, 3H), 3.16–2.94 (m, 2H), 1.38 (t, *J* = 7.5 Hz, 3H).

(*Z*)-3-(2-(Dimethoxymethyl)pyridin-1-ium-1-yl)-1,4-dimethoxy-1,4-dioxobut-2-ene-2-thiolate (**2l**)

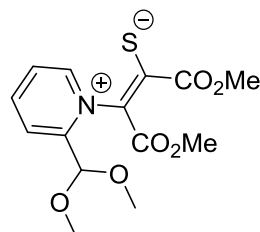

The product was purified by washing with Et<sub>2</sub>O (2 × 5 mL) and EtOH (5 mL).

Brown crystals, yield 24 mg (4 %), m.p. = 161–162°C.

**<sup>1</sup>H NMR** (400 MHz, CDCl<sub>3</sub>) δ 8.45 (td, *J* = 7.9, 1.5 Hz, 1H), 8.40 (dd, *J* = 6.1, 1.5 Hz, 1H), 8.27 (dd, *J* = 8.1, 1.6 Hz, 1H), 7.93 (ddd, *J* = 7.8, 6.1, 1.6 Hz, 1H), 5.53 (s, 1H), 3.93 (s, 3H), 3.69 (s, 3H), 3.58 (s, 3H), 3.38 (s, 3H). **<sup>13</sup>C NMR** (101 MHz, CDCl<sub>3</sub>) δ 169.7, 161.0, 156.6, 149.6, 145.6, 143.6, 127.7, 126.3, 105.1, 99.8, 57.4, 55.2, 53.0, 52.0. **HRMS (ESI)** calcd for C<sub>14</sub>H<sub>18</sub>NO<sub>6</sub>S<sup>+</sup> [M+H]<sup>+</sup> *m/z*: 328.0849; found 328.0852.

#### 1.4. [3+3] Annulation of Diazo Compounds **1** and Pyridinium 1,4-zwitterionic Thiolates **2**

To a 10-mL reaction tube were sequentially added diazo compound **1** (0.6 mmol), pyridinium 1,4-zwitterionic thiolate **2** (0.2 mmol), and PhCl (3 mL) at room temperature, then the reaction mixture was stirred at 105°C for 10 min under M.W. irradiation. After completion of the reaction, the organic layer was concentrated under reduced pressure to yield the crude product, which was purified by silica gel column chromatography (EtOAc/petroleum ether) to give the corresponding product **3**.

Dimethyl 1-(diphenylphosphoryl)-1*H*-isothiochromene-3,4-dicarboxylate (**3aa**)

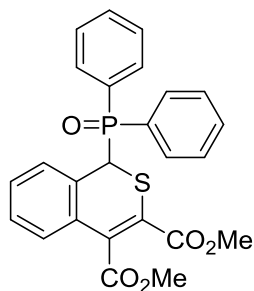

The product was purified by silica gel column chromatography with petroleum ether (60–90°C fraction) and ethyl acetate (PE:EA = 2:1, v/v) as eluent.

Colorless crystals, yield 65 mg (70%), m.p. = 181–182°C.  $R_f$  = 0.20 (PE: EA = 1:1, v/v).

$^1\text{H NMR}$  (400 MHz,  $\text{CDCl}_3$ )  $\delta$  7.82–7.77 (m, 2H), 7.71 (ddd,  $J$  = 11.1, 8.2, 1.3 Hz, 2H), 7.53 (tt,  $J$  = 7.1, 3.5 Hz, 2H), 7.45 (ddd,  $J$  = 8.6, 6.9, 3.1 Hz, 2H), 7.39 (td,  $J$  = 7.7, 3.2 Hz, 2H), 7.31–7.24 (m, 2H), 7.19–7.17 (m, 1H), 6.98 (d,  $J$  = 6.8 Hz, 1H), 4.70 (d,  $J$  = 13.2 Hz, 1H), 3.79 (s, 3H), 3.71 (s, 3H).

$^{13}\text{C NMR}$  (101 MHz,  $\text{CDCl}_3$ )  $\delta$  167.3, 163.2, 137.1, 132.7 (d,  $J$  = 8.8 Hz), 132.3 (d,  $J$  = 1.8 Hz), 132.3 (d,  $J$  = 2.2 Hz), 132.1 (d,  $J$  = 8.6 Hz), 131.0, 130.9 (d,  $J$  = 7.1 Hz), 130.4 (d,  $J$  = 97.2 Hz), 130.3 (d,  $J$  = 3.2 Hz), 129.4 (d,  $J$  = 97.9 Hz), 129.0 (d,  $J$  = 2.5 Hz), 128.7 (d,  $J$  = 11.6 Hz), 128.4 (d,  $J$  = 11.7 Hz), 127.2 (d,  $J$  = 2.2 Hz), 125.0, 123.6, 52.9, 52.6, 42.8 (d,  $J$  = 63.9 Hz).  $^{31}\text{P NMR}$  (162 MHz,  $\text{CDCl}_3$ )  $\delta$  26.1. **HRMS (ESI)** calcd for  $\text{C}_{25}\text{H}_{22}\text{O}_5\text{PS}^+$   $[\text{M}+\text{H}]^+$   $m/z$ : 465.0920; found 465.0926.

Dimethyl 1-(diphenylphosphoryl)-6-methyl-1*H*-isothiochromene-3,4-dicarboxylate (**3ba**)

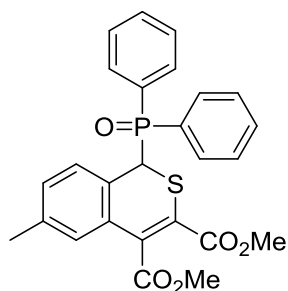

The product was purified by silica gel column chromatography with petroleum ether (60–90°C fraction) and ethyl acetate (PE:EA = 2:1, v/v) as eluent.

Yellow oil, yield 72 mg (75%).  $R_f$  = 0.18 (PE: EA = 1:1, v/v).

$^1\text{H NMR}$  (400 MHz,  $\text{CDCl}_3$ )  $\delta$  7.82–7.77 (m, 2H), 7.70 (ddd,  $J$  = 11.1, 8.2, 1.4 Hz, 2H), 7.56–7.49 (m, 2H), 7.46–7.41 (m, 2H), 7.37 (td,  $J$  = 7.7, 3.1 Hz, 2H), 7.07 (d,  $J$  = 7.6 Hz, 1H), 6.95 (s, 1H), 6.87 (dd,  $J$  = 7.8, 1.9 Hz, 1H), 4.67 (d,  $J$  = 13.0 Hz, 1H), 3.79 (s, 3H), 3.69 (s, 3H), 2.29 (s, 3H).  $^{13}\text{C NMR}$  (101 MHz,  $\text{CDCl}_3$ )  $\delta$  167.4, 163.2, 138.9, 137.3, 132.7 (d,  $J$  = 8.7 Hz), 132.2 (d,  $J$  = 1.6 Hz), 132.0 (d,

$J = 8.3$  Hz), 131.8, 130.7 (d,  $J = 3.3$  Hz), 130.5 (d,  $J = 96.8$  Hz), 129.5 (d,  $J = 108.7$  Hz), 128.6 (d,  $J = 11.3$  Hz), 128.3 (d,  $J = 11.8$  Hz), 127.7, 123.2, 122.0, 52.8, 52.6, 42.4 (d,  $J = 64.5$  Hz), 21.3.  **$^{31}\text{P}$  NMR** (162 MHz,  $\text{CDCl}_3$ )  $\delta$  26.1. **HRMS (ESI)** calcd for  $\text{C}_{26}\text{H}_{24}\text{O}_5\text{PS}^+$   $[\text{M}+\text{H}]^+$   $m/z$ : 479.1077; found 479.1083.

Dimethyl 6-(*tert*-butyl)-1-(diphenylphosphoryl)-1*H*-isothiochromene-3,4-dicarboxylate (**3ca**)

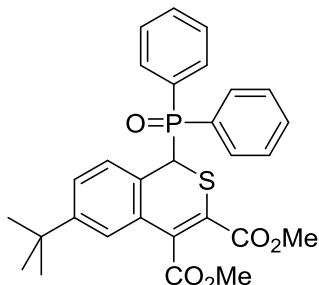

The product was purified by silica gel column chromatography with petroleum ether (60–90°C fraction) and ethyl acetate (PE:EA = 2:1, v/v) as eluent.

Yellow oil, yield 65 mg (63%).  $R_f = 0.08$  (PE: EA = 1:1, v/v).

**$^1\text{H}$  NMR** (400 MHz,  $\text{CDCl}_3$ )  $\delta$  7.79 (ddd,  $J = 11.0, 8.3, 1.3$  Hz, 2H), 7.70 (ddd,  $J = 11.1, 8.2, 1.3$  Hz, 2H), 7.52 (dddd,  $J = 10.5, 7.3, 2.9, 1.5$  Hz, 2H), 7.46–7.36 (m, 4H), 7.29 (dd,  $J = 8.0, 2.0$  Hz, 1H), 7.17 (d,  $J = 2.0$  Hz, 1H), 6.92 (dd,  $J = 8.1, 2.0$  Hz, 1H), 4.68 (d,  $J = 12.9$  Hz, 1H), 3.80 (s, 3H), 3.70 (s, 3H), 1.27 (s, 9H).  **$^{13}\text{C}$  NMR** (101 MHz,  $\text{CDCl}_3$ )  $\delta$  167.4, 163.3, 152.0, 137.7, 132.7 (d,  $J = 8.7$  Hz), 132.2, 132.1 (d,  $J = 8.5$  Hz), 130.6 (d,  $J = 98.4$  Hz), 130.5 (d,  $J = 3.1$  Hz), 129.9, 129.5 (d,  $J = 98.2$  Hz), 129.3, 128.6 (d,  $J = 11.5$  Hz), 128.3, 128.2, 124.1, 123.1, 122.2, 52.9, 52.5, 42.4 (d,  $J = 64.8$  Hz), 34.8, 31.2.  **$^{31}\text{P}$  NMR** (162 MHz,  $\text{CDCl}_3$ )  $\delta$  26.4. **HRMS (ESI)** calcd for  $\text{C}_{29}\text{H}_{30}\text{O}_5\text{PS}^+$   $[\text{M}+\text{H}]^+$   $m/z$ : 521.1546; found 521.1549.

Dimethyl 1-(diphenylphosphoryl)-6-methoxy-1*H*-isothiochromene-3,4-dicarboxylate (**3da**)

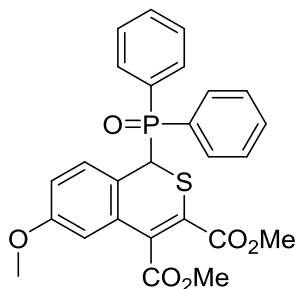

The product was purified by silica gel column chromatography with petroleum ether (60–90°C fraction) and ethyl acetate (PE:EA = 2:1, v/v) as eluent.

Yellow oil, yield 53 mg (54%).  $R_f = 0.20$  (PE: EA = 1:1, v/v).

**$^1\text{H}$  NMR** (400 MHz,  $\text{CDCl}_3$ )  $\delta$  7.80 (ddd,  $J = 10.9, 8.3, 1.4$  Hz, 2H), 7.71 (ddt,  $J = 11.1, 6.9, 1.3$  Hz, 2H), 7.57–7.50 (m, 2H), 7.45 (ddd,  $J = 8.5, 6.8, 3.1$  Hz, 2H), 7.41–7.37 (m, 2H), 6.91 (dd,  $J = 8.5, 2.0$  Hz, 1H), 6.81 (dd,  $J = 8.4, 2.6$  Hz, 1H), 6.73 (d,  $J = 2.6$  Hz, 1H), 4.67 (d,  $J = 12.7$  Hz, 1H), 3.78 (s, 6H), 3.71 (s, 3H).  **$^{13}\text{C}$  NMR** (101 MHz,  $\text{CDCl}_3$ )  $\delta$  167.2, 163.3, 159.8, 136.8, 132.7 (d,  $J = 8.9$  Hz), 132.3, 132.1 (d,  $J = 8.4$  Hz), 131.9 (d,  $J = 3.2$  Hz), 131.4 (d,  $J = 93.3$  Hz), 131.2 (d,  $J = 2.9$  Hz), 129.9, 129.4 (d,  $J = 88.7$  Hz), 128.7 (d,  $J = 11.2$  Hz), 128.4 (d,  $J = 11.7$  Hz), 124.3, 116.9, 115.9, 113.1, 55.6, 52.9, 52.6, 42.2 (d,  $J = 65.3$  Hz).  **$^{31}\text{P}$  NMR** (162 MHz,  $\text{CDCl}_3$ )  $\delta$  26.1. **HRMS (ESI)** calcd for  $\text{C}_{26}\text{H}_{24}\text{O}_6\text{PS}^+$   $[\text{M}+\text{H}]^+$   $m/z$ : 495.1026; found 495.1027.

Dimethyl 6-chloro-1-(diphenylphosphoryl)-1*H*-isothiochromene-3,4-dicarboxylate (**3ea**)

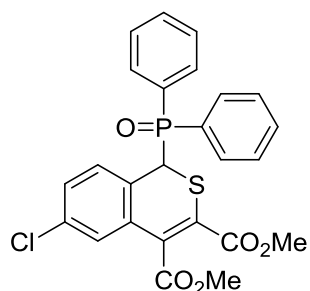

The product was purified by silica gel column chromatography with petroleum ether (60–90°C fraction) and ethyl acetate (PE:EA = 3:1 to 1:1, v/v) as eluent.

Yellow oil, yield 70 mg (71%).  $R_f$  = 0.15 (PE: EA = 3:2, v/v).

**<sup>1</sup>H NMR** (400 MHz, CDCl<sub>3</sub>)  $\delta$  7.82–7.77 (m, 2H), 7.75–7.70 (m, 2H), 7.55 (qd,  $J$  = 7.2, 1.4 Hz, 2H), 7.46 (td,  $J$  = 7.6, 3.1 Hz, 2H), 7.40 (td,  $J$  = 7.7, 3.1 Hz, 2H), 7.23 (dd,  $J$  = 8.1, 2.2 Hz, 1H), 7.19 (d,  $J$  = 2.1 Hz, 1H), 6.93 (dd,  $J$  = 8.3, 1.9 Hz, 1H), 4.67 (d,  $J$  = 12.7 Hz, 1H), 3.79 (s, 3H), 3.72 (s, 3H). **<sup>13</sup>C NMR** (101 MHz, CDCl<sub>3</sub>)  $\delta$  166.7, 163.0, 135.6, 135.0 (d,  $J$  = 3.1 Hz), 132.6 (d,  $J$  = 8.8 Hz), 132.5 (d,  $J$  = 2.8 Hz), 132.0, 132.0, 131.9, 131.8, 131.2 (d,  $J$  = 108.6 Hz), 129.6, 129.5, 128.8 (d,  $J$  = 11.6 Hz), 128.5 (d,  $J$  = 11.8 Hz), 126.9 (d,  $J$  = 2.3 Hz), 125.6, 123.4, 53.1, 52.8, 42.1 (d,  $J$  = 63.7 Hz). **<sup>31</sup>P NMR** (162 MHz, CDCl<sub>3</sub>)  $\delta$  26.1. **HRMS (ESI)** calcd for C<sub>25</sub>H<sub>21</sub>ClO<sub>5</sub>PS<sup>+</sup> [M+H]<sup>+</sup>  $m/z$ : 499.0530; found 499.0535.

Dimethyl 1-(diphenylphosphoryl)-6-(trifluoromethyl)-1*H*-isothiochromene-3,4-dicarboxylate (**3fa**)

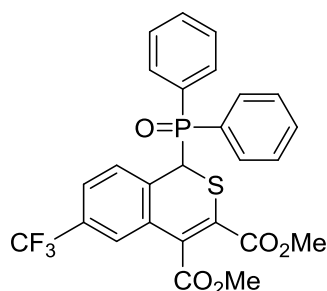

The product was purified by silica gel column chromatography with petroleum ether (60–90°C fraction) and ethyl acetate (PE:EA = 1:1, v/v) as eluent.

Yellow oil, yield 41 mg (39%).  $R_f$  = 0.05 (PE: EA = 2:3, v/v).

**<sup>1</sup>H NMR** (400 MHz, CDCl<sub>3</sub>)  $\delta$  7.83–7.78 (m, 2H), 7.76–7.71 (m, 2H), 7.60–7.40 (m, 8H), 7.13 (d,  $J$  = 8.0 Hz, 1H), 4.73 (d,  $J$  = 12.7 Hz, 1H), 3.81 (s, 3H), 3.74 (s, 3H). **<sup>13</sup>C NMR** (101 MHz, CDCl<sub>3</sub>)  $\delta$  166.5, 163.0, 135.6, 132.68 (d,  $J$  = 11.6 Hz), 132.66, 131.9 (d,  $J$  = 8.7 Hz), 131.4 (d,  $J$  = 4.0 Hz), 130.1 (d,  $J$  = 98.9 Hz), 130.0 (d,  $J$  = 3.2 Hz), 128.9 (d,  $J$  = 11.6 Hz), 128.8 (d,  $J$  = 99.9 Hz), 128.6 (d,  $J$  = 11.8 Hz), 127.3, 126.3, 123.8, 122.2, 53.2, 52.9, 42.4 (d,  $J$  = 62.1 Hz). **<sup>31</sup>P NMR** (162 MHz, CDCl<sub>3</sub>)  $\delta$  26.3. **<sup>19</sup>F NMR** (376MHz, CDCl<sub>3</sub>)  $\delta$  -63.0. **HRMS (ESI)** calcd for C<sub>26</sub>H<sub>21</sub>F<sub>3</sub>O<sub>5</sub>PS<sup>+</sup> [M+H]<sup>+</sup>  $m/z$ : 533.0794; found 533.0789.

Dimethyl 1-(di-*p*-tolylphosphoryl)-1*H*-isothiochromene-3,4-dicarboxylate (**3ha**)



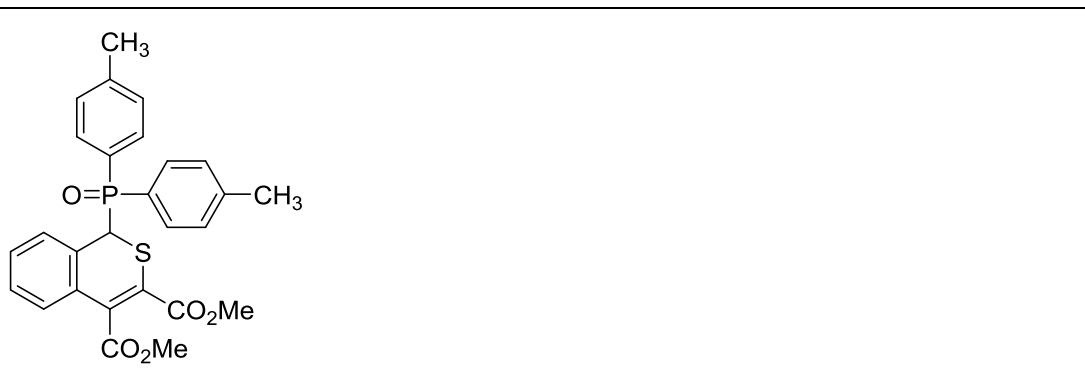

The product was purified by silica gel column chromatography with petroleum ether (60–90°C fraction) and ethyl acetate (PE:EA = 1:1, *v/v*) as eluent.

Yellow oil, yield 13 mg (13%).  $R_f = 0.05$  (PE: EA = 2:3, *v/v*).

**$^1\text{H NMR}$**  (400 MHz,  $\text{CDCl}_3$ )  $\delta$  7.64 (dd,  $J = 10.9, 8.1$  Hz, 2H), 7.57 (dd,  $J = 10.9, 8.0$  Hz, 2H), 7.25 (td,  $J = 8.6, 8.0, 3.4$  Hz, 4H), 7.17 (td,  $J = 7.6, 6.6, 3.8$  Hz, 3H), 7.00 (dt,  $J = 6.5, 2.1$  Hz, 1H), 4.66 (d,  $J = 13.1$  Hz, 1H), 3.79 (s, 3H), 3.71 (s, 3H), 2.39 (s, 3H), 2.39 (s, 3H).  **$^{13}\text{C NMR}$**  (101 MHz,  $\text{CDCl}_3$ )  $\delta$  167.3, 163.3, 142.82 (d,  $J = 2.5$  Hz), 142.77 (d,  $J = 2.6$  Hz), 136.9, 132.7 (d,  $J = 9.1$  Hz), 132.1 (d,  $J = 9.0$  Hz), 130.95 (d,  $J = 3.8$  Hz), 130.88, 130.3 (d,  $J = 2.9$  Hz), 129.4 (d,  $J = 11.8$  Hz), 129.1 (d,  $J = 12.1$  Hz), 128.8, 127.14, 127.10 (d,  $J = 101.3$  Hz), 126.1 (d,  $J = 103.6$  Hz), 125.2, 123.7, 52.9, 52.6, 42.8 (d,  $J = 64.0$  Hz), 21.8.  **$^{31}\text{P NMR}$**  (162 MHz,  $\text{CDCl}_3$ )  $\delta$  26.9. **HRMS (ESI)** calcd for  $\text{C}_{27}\text{H}_{26}\text{O}_5\text{PS}^+$   $[\text{M}+\text{H}]^+$   $m/z$ : 493.1233; found 493.1237.

Dimethyl 1-(bis(4-chlorophenyl)phosphoryl)-1H-isothiochromene-3,4-dicarboxylate (**3ia**)

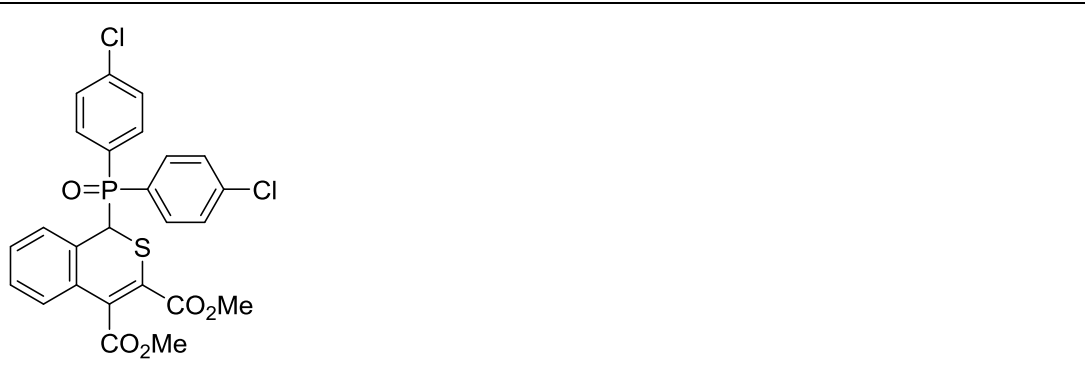

The product was purified by silica gel column chromatography with petroleum ether (60–90°C fraction) and ethyl acetate (PE:EA = 4:1, *v/v*) as eluent.

Yellow oil, yield 36 mg (34%).  $R_f = 0.05$  (PE: EA = 2:1, *v/v*).

**$^1\text{H NMR}$**  (400 MHz,  $\text{CDCl}_3$ )  $\delta$  7.76 (dd,  $J = 10.6, 8.4$  Hz, 2H), 7.57 (dd,  $J = 10.7, 8.4$  Hz, 2H), 7.47 (dd,  $J = 8.5, 2.4$  Hz, 2H), 7.35 (ddd,  $J = 11.9, 7.1, 2.0$  Hz, 4H), 7.19 (dd,  $J = 7.3, 2.0$  Hz, 1H), 7.08 (d,  $J = 6.7$  Hz, 1H), 4.67 (d,  $J = 14.1$  Hz, 1H), 3.81 (s, 3H), 3.75 (s, 3H).  **$^{13}\text{C NMR}$**  (101 MHz,  $\text{CDCl}_3$ )  $\delta$  167.0, 163.1, 139.5, 139.4, 138.8 (d,  $J = 3.8$  Hz), 137.0 (d,  $J = 9.1$  Hz), 134.0 (d,  $J = 9.6$  Hz), 133.5 (d,  $J = 9.4$  Hz), 131.3 (d,  $J = 2.1$  Hz), 131.1 (d,  $J = 4.1$  Hz), 130.6 (d,  $J = 97.8$  Hz), 129.5 (d,  $J = 93.5$  Hz), 129.3 (d,  $J = 2.5$  Hz), 129.2 (d,  $J = 12.2$  Hz), 128.9 (d,  $J = 12.3$  Hz), 127.9 (d,  $J = 3.3$  Hz), 127.4 (d,  $J = 2.1$  Hz), 124.3, 53.1, 52.9, 42.7 (d,  $J = 65.4$  Hz).  **$^{31}\text{P NMR}$**  (162 MHz,  $\text{CDCl}_3$ )  $\delta$  24.7. **HRMS (ESI)** calcd for  $\text{C}_{25}\text{H}_{20}\text{Cl}_2\text{O}_5\text{PS}^+$   $[\text{M}+\text{H}]^+$   $m/z$ : 533.0141; found 533.0145.

Diethyl 1-(diphenylphosphoryl)-1H-isothiochromene-3,4-dicarboxylate (**3ab**)

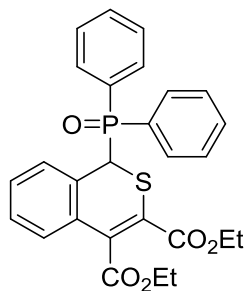

The product was purified by silica gel column chromatography with petroleum ether (60–90°C fraction) and ethyl acetate (PE:EA = 1:1, v/v) as eluent.

Yellow oil, yield 54 mg (55%).  $R_f$  = 0.15 (PE: EA = 2:3, v/v).

$^1\text{H NMR}$  (400 MHz,  $\text{CDCl}_3$ )  $\delta$  7.86 (ddd,  $J$  = 11.0, 8.4, 1.4 Hz, 2H), 7.70 (ddd,  $J$  = 11.1, 8.2, 1.3 Hz, 2H), 7.58–7.45 (m, 4H), 7.37 (tdd,  $J$  = 7.6, 3.3, 1.8 Hz, 2H), 7.29 (dd,  $J$  = 5.8, 3.4 Hz, 2H), 7.15 (dd,  $J$  = 5.6, 3.7 Hz, 1H), 7.06–7.03 (m, 1H), 4.71 (d,  $J$  = 14.2 Hz, 1H), 4.31–4.22 (m, 2H), 4.16 (q,  $J$  = 7.1 Hz, 2H), 1.32 (t,  $J$  = 7.2 Hz, 3H), 1.26 (t,  $J$  = 7.1 Hz, 3H).  $^{13}\text{C NMR}$  (101 MHz,  $\text{CDCl}_3$ )  $\delta$  166.7, 162.8, 136.7, 132.7 (d,  $J$  = 9.0 Hz), 132.3 (d,  $J$  = 2.4 Hz), 132.1 (d,  $J$  = 8.5 Hz), 131.1 (d,  $J$  = 3.4 Hz), 130.9, 130.3, 129.8, 128.9, 128.7 (d,  $J$  = 11.7 Hz), 128.3 (d,  $J$  = 11.8 Hz), 127.2, 125.0, 123.9, 62.1, 61.7, 42.9 (d,  $J$  = 63.8 Hz), 14.2, 14.1.  $^{31}\text{P NMR}$  (162 MHz,  $\text{CDCl}_3$ )  $\delta$  25.9. **HRMS (ESI)** calcd for  $\text{C}_{27}\text{H}_{26}\text{O}_5\text{PS}^+$   $[\text{M}+\text{H}]^+$   $m/z$ : 493.1233; found 493.1235.

Di(pentan-3-yl) 1-(diphenylphosphoryl)-1H-isothiochromene-3,4-dicarboxylate (**3ac**)

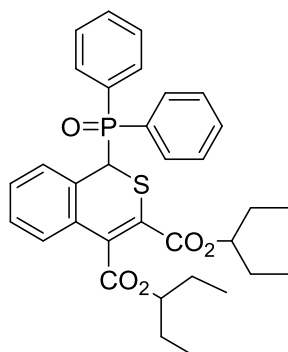

The product was purified by silica gel column chromatography with petroleum ether (60–90°C fraction) and ethyl acetate (PE:EA = 4:1, v/v) as eluent.

Yellow oil, yield 54 mg (47%).  $R_f$  = 0.22 (PE: EA = 2:1, v/v).

$^1\text{H NMR}$  (400 MHz,  $\text{CDCl}_3$ )  $\delta$  7.94–7.89 (m, 2H), 7.67 (ddd,  $J$  = 11.1, 8.2, 1.3 Hz, 2H), 7.55 (dd,  $J$  = 7.4, 1.6 Hz, 1H), 7.51–7.45 (m, 3H), 7.34 (td,  $J$  = 7.7, 3.1 Hz, 2H), 7.29–7.27 (m, 2H), 7.16–7.13 (m, 1H), 7.10 (dt,  $J$  = 6.5, 2.1 Hz, 1H), 4.87 (p,  $J$  = 6.0 Hz, 1H), 4.76–4.69 (m, 2H), 1.74–1.51 (m, 8H), 0.94–0.80 (m, 12H).  $^{13}\text{C NMR}$  (101 MHz,  $\text{CDCl}_3$ )  $\delta$  166.6, 162.1, 140.1, 137.1, 132.6 (d,  $J$  = 8.8 Hz), 132.4 (d,  $J$  = 2.8 Hz), 132.3 (d,  $J$  = 3.0 Hz), 132.2 (d,  $J$  = 8.5 Hz), 131.3 (d,  $J$  = 98.0 Hz), 131.1, 130.7 (d,  $J$  = 8.5 Hz), 129.4 (d,  $J$  = 87.6 Hz), 128.8, 128.6 (d,  $J$  = 11.6 Hz), 128.3 (d,  $J$  = 11.7 Hz), 127.2 (d,  $J$  = 1.9 Hz), 124.9, 123.3, 78.9, 78.8, 43.3 (d,  $J$  = 64.2 Hz), 26.30, 26.27, 25.6, 25.4, 9.7, 9.61, 9.57, 9.5.  $^{31}\text{P NMR}$  (162 MHz,  $\text{CDCl}_3$ )  $\delta$  25.9. **HRMS (ESI)** calcd for  $\text{C}_{33}\text{H}_{38}\text{O}_5\text{PS}^+$   $[\text{M}+\text{H}]^+$   $m/z$ : 577.2172; found 577.1273.

Di-*tert*-butyl 1-(diphenylphosphoryl)-1H-isothiochromene-3,4-dicarboxylate (**3ad**)

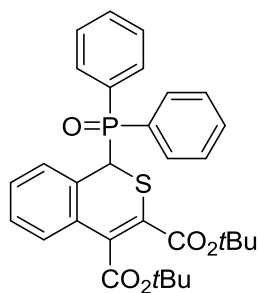

The product was purified by silica gel column chromatography with petroleum ether (60–90°C fraction) and ethyl acetate (PE:EA = 2:1, v/v) as eluent.

Yellow oil, yield 55 mg (51%).  $R_f$  = 0.23 (PE: EA = 1:1, v/v).

$^1\text{H NMR}$  (400 MHz,  $\text{CDCl}_3$ )  $\delta$  7.92 (ddd,  $J$  = 11.0, 8.4, 1.4 Hz, 2H), 7.69–7.64 (m, 2H), 7.56–7.54 (m, 1H), 7.50–7.46 (m, 3H), 7.35 (td,  $J$  = 7.7, 3.2 Hz, 2H), 7.28–7.23 (m, 2H), 7.17 (dd,  $J$  = 7.5, 1.6 Hz, 1H), 7.01 (d,  $J$  = 7.6 Hz, 1H), 4.65 (d,  $J$  = 15.8 Hz, 1H), 1.53 (s, 9H), 1.44 (s, 9H).  $^{13}\text{C NMR}$  (101 MHz,  $\text{CDCl}_3$ )  $\delta$  165.5, 161.5, 136.1, 132.6 (d,  $J$  = 8.7 Hz), 132.3 (d,  $J$  = 3.1 Hz), 132.2, 131.7, 131.6, 131.0 (d,  $J$  = 3.7 Hz), 130.5 (d,  $J$  = 93.8 Hz), 130.3 (d,  $J$  = 2.0 Hz), 129.3 (d,  $J$  = 90.8 Hz), 129.1, 128.8, 128.6 (d,  $J$  = 11.6 Hz), 128.3 (d,  $J$  = 12.0 Hz), 127.1 (d,  $J$  = 2.3 Hz), 125.3, 82.8, 82.6, 44.0 (d,  $J$  = 63.6 Hz), 28.2, 28.1.  $^{31}\text{P NMR}$  (162 MHz,  $\text{CDCl}_3$ )  $\delta$  26.4. **HRMS (ESI)** calcd for  $\text{C}_{31}\text{H}_{34}\text{O}_5\text{PS}^+$   $[\text{M}+\text{H}]^+$   $m/z$ : 549.1859; found 549.1857.

Methyl 3-benzoyl-1-(diphenylphosphoryl)-1H-isothiochromene-4-carboxylate (**3ae**)

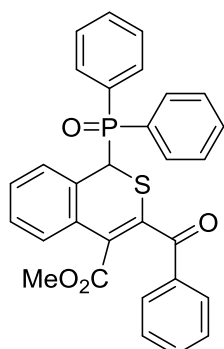

The product was purified by silica gel column chromatography with petroleum ether (60–90°C fraction) and ethyl acetate (PE:EA = 2:1, v/v) as eluent.

Yellow oil, yield 58 mg (57%).  $R_f$  = 0.28 (PE: EA = 1:1, v/v).

$^1\text{H NMR}$  (400 MHz,  $\text{CDCl}_3$ )  $\delta$  8.14–8.12 (m, 2H), 7.85 (ddd,  $J$  = 11.0, 8.3, 1.4 Hz, 2H), 7.66 (ddd,  $J$  = 11.0, 8.2, 1.4 Hz, 2H), 7.57–7.50 (m, 4H), 7.47 (ddd,  $J$  = 7.2, 5.7, 2.3 Hz, 4H), 7.40 (td,  $J$  = 7.7, 3.0 Hz, 2H), 7.29 (dt,  $J$  = 7.7, 1.5 Hz, 1H), 7.09 (t,  $J$  = 7.4 Hz, 1H), 6.60 (dt,  $J$  = 7.7, 1.6 Hz, 1H), 4.60 (d,  $J$  = 7.5 Hz, 1H), 3.30 (s, 3H).  $^{13}\text{C NMR}$  (101 MHz,  $\text{CDCl}_3$ )  $\delta$  192.5, 165.0, 140.1, 135.3, 133.6, 132.4 (d,  $J$  = 2.8 Hz), 132.3 (d,  $J$  = 2.7 Hz), 132.1 (d,  $J$  = 8.5 Hz), 132.0 (d,  $J$  = 8.8 Hz), 131.0 (d,  $J$  = 95.7 Hz), 129.89, 129.85, 129.60, 129.56, 129.31 (d,  $J$  = 87.9 Hz), 129.27 (d,  $J$  = 1.9 Hz), 128.84 (d,  $J$  = 11.6 Hz), 128.83, 128.7 (d,  $J$  = 2.6 Hz), 128.6 (d,  $J$  = 11.7 Hz), 128.1 (d,  $J$  = 2.0 Hz), 124.5, 51.8, 43.5 (d,  $J$  = 65.1 Hz).  $^{31}\text{P NMR}$  (162 MHz,  $\text{CDCl}_3$ )  $\delta$  28.2. **HRMS (ESI)** calcd for  $\text{C}_{30}\text{H}_{24}\text{O}_4\text{PS}^+$   $[\text{M}+\text{H}]^+$   $m/z$ : 511.1127; found 511.1128.

Methyl 1-(diphenylphosphoryl)-3-(furan-2-carbonyl)-1H-isothiochromene-4-carboxylate (**3af**)

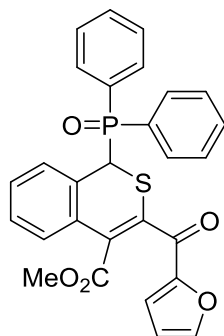

The product was purified by silica gel column chromatography with petroleum ether (60–90°C fraction) and ethyl acetate (PE:EA = 4:1, *v/v*) as eluent.

Yellow oil, yield 35 mg (35%).  $R_f$  = 0.18 (PE: EA = 2:1, *v/v*).

**$^1\text{H NMR}$**  (400 MHz,  $\text{CDCl}_3$ )  $\delta$  7.97 (dd,  $J$  = 3.6, 0.8 Hz, 1H), 7.83 (ddd,  $J$  = 10.9, 8.2, 1.3 Hz, 2H), 7.65–7.59 (m, 3H), 7.55 (dd,  $J$  = 7.4, 1.6 Hz, 1H), 7.50 (t,  $J$  = 2.5 Hz, 1H), 7.48 (dt,  $J$  = 4.0, 1.4 Hz, 1H), 7.45 (d,  $J$  = 1.2 Hz, 1H), 7.38 (td,  $J$  = 7.6, 3.1 Hz, 2H), 7.29 (tt,  $J$  = 7.7, 1.5 Hz, 2H), 7.09 (td,  $J$  = 7.6, 1.0 Hz, 1H), 6.59 (d,  $J$  = 7.9 Hz, 1H), 6.56 (dd,  $J$  = 3.6, 1.7 Hz, 1H), 4.55 (d,  $J$  = 7.0 Hz, 1H), 3.50 (s, 3H).  **$^{13}\text{C NMR}$**  (101 MHz,  $\text{CDCl}_3$ )  $\delta$  179.2, 165.3, 150.7, 148.2, 132.5 (d,  $J$  = 2.7 Hz), 132.3 (d,  $J$  = 2.5 Hz), 132.1 (d,  $J$  = 8.5 Hz), 131.8 (d,  $J$  = 8.6 Hz), 131.6 (d,  $J$  = 2.4 Hz), 131.0 (d,  $J$  = 91.5 Hz), 130.1 (d,  $J$  = 3.1 Hz), 130.0, 129.5 (d,  $J$  = 1.8 Hz), 129.2 (d,  $J$  = 96.0 Hz), 128.9 (d,  $J$  = 11.8 Hz), 128.6 (d,  $J$  = 11.8 Hz), 128.2 (d,  $J$  = 2.2 Hz), 127.4, 124.8, 122.8, 122.2, 112.8, 52.1, 43.2 (d,  $J$  = 64.6 Hz).  **$^{31}\text{P NMR}$**  (162 MHz,  $\text{CDCl}_3$ )  $\delta$  28.3. **HRMS (ESI)** calcd for  $\text{C}_{28}\text{H}_{22}\text{O}_5\text{PS}^+$   $[\text{M}+\text{H}]^+$   $m/z$ : 501.0920; found 501.0923.

## 1.5. ([1+5]-1) Annulation of Diazo Compounds 1 and Pyridinium 1,4-zwitterionic

### Thiolates 2

To a 10-mL reaction tube were sequentially added diazo compound **1** (0.6 mmol), pyridinium 1,4-zwitterionic thiolate **2** (0.2 mmol), and PhCl (3 mL) at room temperature, then the reaction mixture was stirred at 105°C for 10 min under M.W. irradiation. After completion of the reaction, the organic layer was concentrated under reduced pressure to yield the crude product, which was purified by silica gel column chromatography (EtOAc/petroleum ether) to give the corresponding product **4**.

|                                                                                                                                                                                                                                                                                                                                                                                                                                                                                                                                                                                                                                                                                                                                                                                                                            |
|----------------------------------------------------------------------------------------------------------------------------------------------------------------------------------------------------------------------------------------------------------------------------------------------------------------------------------------------------------------------------------------------------------------------------------------------------------------------------------------------------------------------------------------------------------------------------------------------------------------------------------------------------------------------------------------------------------------------------------------------------------------------------------------------------------------------------|
| Dimethyl 1-phenylindolizine-2,3-dicarboxylate ( <b>4aa</b> ) <sup>6</sup> [CAS: 2452307-17-2]                                                                                                                                                                                                                                                                                                                                                                                                                                                                                                                                                                                                                                                                                                                              |
| 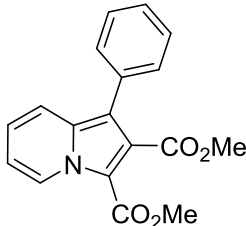                                                                                                                                                                                                                                                                                                                                                                                                                                                                                                                                                                                                                                                                                                                                          |
| The product was purified by silica gel column chromatography with petroleum ether (60–90°C fraction) and ethyl acetate (PE:EA = 20:1, v/v) as eluent.<br>Colorless crystals, yield 7 mg (12%), m.p. 114–115°C. Lit. <sup>6</sup> 104–105 °C. $R_f$ = 0.20 (PE: EA = 10:1, v/v).<br><b><sup>1</sup>H NMR</b> (400 MHz, CDCl <sub>3</sub> ) $\delta$ 9.46 (d, $J$ = 7.1 Hz, 1H), 7.66 (d, $J$ = 8.9 Hz, 1H), 7.49 (d, $J$ = 6.9 Hz, 2H), 7.44 (t, $J$ = 7.5 Hz, 2H), 7.34 (t, $J$ = 7.2 Hz, 1H), 7.09 (dd, $J$ = 9.0, 6.5 Hz, 1H), 6.91 (td, $J$ = 7.0, 1.3 Hz, 1H), 3.91 (s, 3H), 3.85 (s, 3H). <b><sup>13</sup>C NMR</b> (101 MHz, CDCl <sub>3</sub> ) $\delta$ 167.3, 160.9, 134.5, 132.8, 129.2, 128.8, 127.4, 127.3, 126.9, 123.3, 118.2, 115.1, 114.5, 110.8, 52.7, 51.7.                                              |
| Dimethyl 5-methyl-1-phenylindolizine-2,3-dicarboxylate ( <b>4ag</b> )                                                                                                                                                                                                                                                                                                                                                                                                                                                                                                                                                                                                                                                                                                                                                      |
|                                                                                                                                                                                                                                                                                                                                                                                                                                                                                                                                                                                                                                                                                                                                         |
| The product was purified by silica gel column chromatography with petroleum ether (60–90°C fraction) and ethyl acetate (PE:EA = 20:1, v/v) as eluent.<br>Colorless crystals, yield 32 mg (50%), m.p. 114–115°C. $R_f$ = 0.58 (PE: EA = 4:1, v/v).<br><b><sup>1</sup>H NMR</b> (400 MHz, CDCl <sub>3</sub> ) $\delta$ 7.46–7.40 (m, 5H), 7.35 (td, $J$ = 5.8, 2.7 Hz, 1H), 6.89 (dd, $J$ = 9.1, 6.7 Hz, 1H), 6.61 (dt, $J$ = 6.7, 1.1 Hz, 1H), 3.96 (s, 3H), 3.76 (s, 3H), 2.60 (s, 3H). <b><sup>13</sup>C NMR</b> (101 MHz, CDCl <sub>3</sub> ) $\delta$ 166.0, 163.2, 136.0, 134.5, 133.5, 130.4, 128.3, 127.1, 122.9, 121.6, 116.9, 115.9, 115.5, 105.1, 52.8, 52.1, 21.2. <b>HRMS (ESI)</b> calcd for C <sub>19</sub> H <sub>18</sub> NO <sub>4</sub> <sup>+</sup> [M+H] <sup>+</sup> $m/z$ : 324.1230; found 324.1230. |
| Dimethyl 8-methyl-1-phenylindolizine-2,3-dicarboxylate ( <b>4ah</b> ) and dimethyl 6-methyl-1-phenylindolizine-2,3-dicarboxylate ( <b>4ah'</b> )                                                                                                                                                                                                                                                                                                                                                                                                                                                                                                                                                                                                                                                                           |

|                                                                                                                                                                                                                                                                                                                                                                                                                                                                                                                                                                                                                                                                                                                                                                                                                                                                                                                                                                                                                                                                                                                                                                                                                          |
|--------------------------------------------------------------------------------------------------------------------------------------------------------------------------------------------------------------------------------------------------------------------------------------------------------------------------------------------------------------------------------------------------------------------------------------------------------------------------------------------------------------------------------------------------------------------------------------------------------------------------------------------------------------------------------------------------------------------------------------------------------------------------------------------------------------------------------------------------------------------------------------------------------------------------------------------------------------------------------------------------------------------------------------------------------------------------------------------------------------------------------------------------------------------------------------------------------------------------|
| <div style="display: flex; justify-content: space-around; align-items: center;"> <div style="text-align: center;"> 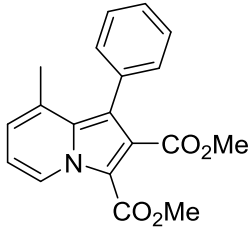 <p>4ah 17%</p> </div> <div style="text-align: center;">  <p>4ah' 8%</p> </div> </div> <p style="text-align: center;">68:32</p>                                                                                                                                                                                                                                                                                                                                                                                                                                                                                                                                                                                                                                                                                                                                                                                                     |
| <p>The product was purified by silica gel column chromatography with petroleum ether (60–90°C fraction) and ethyl acetate (PE:EA = 20:1, v/v) as eluent.</p> <p>Colorless oil, yield 16 mg (25%), <b>3ah</b>: <b>3ah'</b> = 68:32. <math>R_f</math> = 0.38 (PE: EA = 10:1, v/v).</p> <p><b><sup>1</sup>H NMR</b> (400 MHz, CDCl<sub>3</sub>) (<b>3ah</b>, <b>3ah'</b>) <math>\delta</math> 9.4 (t, <math>J</math> = 8.0 Hz, 1H), 9.29 (d, <math>J</math> = 1.7 Hz, 0.5H), 7.57 (d, <math>J</math> = 9.1 Hz, 0.5H), 7.49–7.41 (m, 3H), 7.36–7.31 (m, 4.5H), 6.97 (dd, <math>J</math> = 9.2, 1.5 Hz, 0.5H), 6.80 (d, <math>J</math> = 4.4 Hz, 2H), 3.90 (s, 1.5H), 3.89 (s, 3H), 3.84 (s, 1.5H), 3.70 (s, 3H), 2.37 (s, 1.5H), 2.01 (s, 3H).</p> <p><b><sup>13</sup>C NMR</b> (101 MHz, CDCl<sub>3</sub>) (<b>3ah</b>, <b>3ah'</b>) <math>\delta</math> 168.0, 167.5, 167.0, 161.0, 134.2, 134.1, 133.0, 131.4, 129.7, 129.3, 128.9, 128.6, 127.7, 127.6, 127.2, 126.6, 125.4, 125.3, 124.5, 123.7, 117.6, 116.4, 114.0, 110.5, 52.7, 52.4, 51.71, 51.70, 20.5, 18.8. <b>HRMS (ESI)</b> calcd for C<sub>19</sub>H<sub>18</sub>NO<sub>4</sub><sup>+</sup> [M+H]<sup>+</sup> <math>m/z</math>: 324.1230; found 324.1231.</p> |
| <p>Dimethyl 7-methyl-1-phenylindolizine-2,3-dicarboxylate (<b>4ai</b>)</p> <div style="text-align: center;">  </div>                                                                                                                                                                                                                                                                                                                                                                                                                                                                                                                                                                                                                                                                                                                                                                                                                                                                                                                                                                                                                   |
| <p>The product was purified by silica gel column chromatography with petroleum ether (60–90°C fraction) and ethyl acetate (PE:EA = 20:1, v/v) as eluent.</p> <p>Colorless oil, yield 16 mg (25%). <math>R_f</math> = 0.37 (PE: EA = 10:1, v/v).</p> <p><b><sup>1</sup>H NMR</b> (400 MHz, CDCl<sub>3</sub>) <math>\delta</math> 9.35 (d, <math>J</math> = 7.2 Hz, 1H), 7.49–7.41 (m, 5H), 7.33 (t, <math>J</math> = 7.1 Hz, 1H), 6.76 (dd, <math>J</math> = 7.3, 1.8 Hz, 1H), 3.90 (s, 3H), 3.84 (s, 3H), 2.35 (d, <math>J</math> = 1.1 Hz, 3H). <b><sup>13</sup>C NMR</b> (101 MHz, CDCl<sub>3</sub>) <math>\delta</math> 167.5, 161.0, 135.1, 134.4, 133.1, 129.3, 128.9, 127.2, 127.1, 127.0, 117.2, 116.6, 113.9, 110.2, 52.7, 51.7, 21.4. <b>HRMS (ESI)</b> calcd for C<sub>19</sub>H<sub>18</sub>NO<sub>4</sub><sup>+</sup> [M+H]<sup>+</sup> <math>m/z</math>: 324.1230; found 324.1229.</p>                                                                                                                                                                                                                                                                                                                      |
| <p>Dimethyl 5-ethyl-1-phenylindolizine-2,3-dicarboxylate (<b>4aj</b>)</p> <div style="text-align: center;">  </div>                                                                                                                                                                                                                                                                                                                                                                                                                                                                                                                                                                                                                                                                                                                                                                                                                                                                                                                                                                                                                   |
| <p>The product was purified by silica gel column chromatography with petroleum ether (60–90°C fraction) and ethyl acetate (PE:EA = 20:1, v/v) as eluent.</p> <p>Yellow oil, yield 31 mg (46%). <math>R_f</math> = 0.25 (PE: EA = 10:1, v/v).</p> <p><b><sup>1</sup>H NMR</b> (400 MHz, CDCl<sub>3</sub>) <math>\delta</math> 7.47–7.40 (m, 5H), 7.34 (td, <math>J</math> = 5.9, 2.6 Hz, 1H), 6.94 (dd, <math>J</math> = 9.0,</p>                                                                                                                                                                                                                                                                                                                                                                                                                                                                                                                                                                                                                                                                                                                                                                                         |

6.9 Hz, 1H), 6.67 (dt,  $J = 6.8, 1.2$  Hz, 1H), 3.96 (s, 3H), 3.76 (s, 3H), 2.98 (q,  $J = 7.3$  Hz, 2H), 1.32 (t,  $J = 7.3$  Hz, 3H).  $^{13}\text{C NMR}$  (101 MHz,  $\text{CDCl}_3$ )  $\delta$  166.1, 163.4, 141.4, 134.6, 133.5, 130.3, 128.3, 127.1, 123.3, 121.6, 116.8, 116.5, 115.8, 112.5, 52.9, 52.1, 26.0, 11.3. **HRMS (ESI)** calcd for  $\text{C}_{20}\text{H}_{20}\text{NO}_4^+$   $[\text{M}+\text{H}]^+$   $m/z$ : 338.1387; found 338.1389.

Dimethyl 5-methyl-1-(*p*-tolyl)indolizine-2,3-dicarboxylate (**4bg**)

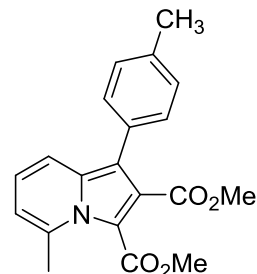

The product was purified by silica gel column chromatography with petroleum ether (60–90°C fraction) and ethyl acetate (PE:EA = 20:1,  $v/v$ ) as eluent.

Yellow oil, yield 35 mg (52%).  $R_f = 0.28$  (PE: EA = 10:1,  $v/v$ ).

$^1\text{H NMR}$  (400 MHz,  $\text{CDCl}_3$ )  $\delta$  7.43 (d,  $J = 9.3$  Hz, 1H), 7.34 (d,  $J = 8.1$  Hz, 2H), 7.24 (d,  $J = 8.0$  Hz, 2H), 6.87 (dd,  $J = 9.0, 6.7$  Hz, 1H), 6.60 (dt,  $J = 6.6, 1.2$  Hz, 1H), 3.95 (s, 3H), 3.78 (s, 3H), 2.59 (s, 3H), 2.41 (s, 3H).  $^{13}\text{C NMR}$  (101 MHz,  $\text{CDCl}_3$ )  $\delta$  166.0, 163.1, 136.7, 135.9, 134.5, 130.4, 130.2, 129.1, 123.0, 121.4, 116.9, 116.3, 115.9, 115.5, 52.7, 52.1, 21.4, 21.2. **HRMS (ESI)** calcd for  $\text{C}_{20}\text{H}_{20}\text{NO}_4^+$   $[\text{M}+\text{H}]^+$   $m/z$ : 338.1387; found 338.1388.

Dimethyl 1-(4-(*tert*-butyl)phenyl)-5-methylindolizine-2,3-dicarboxylate (**4cg**)

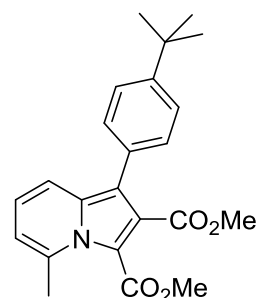

The product was purified by silica gel column chromatography with petroleum ether (60–90°C fraction) and ethyl acetate (PE:EA = 20:1,  $v/v$ ) as eluent.

Yellow oil, yield 38 mg (51%).  $R_f = 0.25$  (PE: EA = 10:1,  $v/v$ ).

$^1\text{H NMR}$  (400 MHz,  $\text{CDCl}_3$ )  $\delta$  7.49–7.43 (m, 3H), 7.38 (d,  $J = 8.4$  Hz, 2H), 6.88 (dd,  $J = 9.0, 6.7$  Hz, 1H), 6.60 (dd,  $J = 6.7, 1.3$  Hz, 1H), 3.95 (s, 3H), 3.79 (s, 3H), 2.60 (s, 3H), 1.37 (s, 9H).  $^{13}\text{C NMR}$  (101 MHz,  $\text{CDCl}_3$ )  $\delta$  166.1, 163.1, 149.8, 136.0, 134.7, 130.3, 129.9, 125.3, 123.1, 121.5, 117.1, 116.2, 115.8, 115.5, 52.7, 52.2, 34.7, 31.5, 21.2. **HRMS (ESI)** calcd for  $\text{C}_{23}\text{H}_{26}\text{NO}_4^+$   $[\text{M}+\text{H}]^+$   $m/z$ : 380.1856; found 380.1858.

Dimethyl 1-(4-methoxyphenyl)-5-methylindolizine-2,3-dicarboxylate (**4dg**)

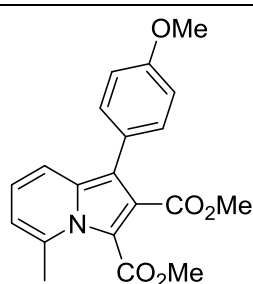

The product was purified by silica gel column chromatography with petroleum ether (60–90°C fraction) and ethyl acetate (PE:EA = 20:1, v/v) as eluent.

Yellow oil, yield 31 mg (46%).  $R_f = 0.22$  (PE: EA = 10:1, v/v).

**$^1\text{H NMR}$**  (400 MHz,  $\text{CDCl}_3$ )  $\delta$  7.41–7.34 (m, 3H), 6.97 (d,  $J = 8.5$  Hz, 2H), 6.87 (dd,  $J = 9.0, 6.7$  Hz, 1H), 6.59 (d,  $J = 6.7$  Hz, 1H), 3.95 (s, 3H), 3.86 (s, 3H), 3.77 (s, 3H), 2.59 (s, 3H).  **$^{13}\text{C NMR}$**  (101 MHz,  $\text{CDCl}_3$ )  $\delta$  166.1, 163.2, 158.8, 135.9, 134.6, 131.5, 125.7, 122.9, 121.3, 116.9, 116.3, 115.7, 115.5, 113.9, 55.4, 52.8, 52.1, 21.2. **HRMS (ESI)** calcd for  $\text{C}_{20}\text{H}_{20}\text{NO}_5^+$   $[\text{M}+\text{H}]^+$   $m/z$ : 354.1336; found 354.1338.

Dimethyl 1-(4-chlorophenyl)-5-methylindolizine-2,3-dicarboxylate (**4eg**)

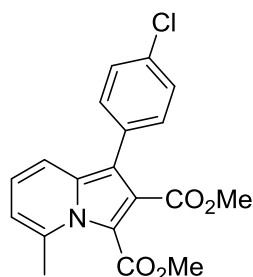

The product was purified by silica gel column chromatography with petroleum ether (60–90°C fraction) and ethyl acetate (PE:EA = 20:1, v/v) as eluent.

Yellow oil, yield 36 mg (51%).  $R_f = 0.20$  (PE: EA = 10:1, v/v).

**$^1\text{H NMR}$**  (400 MHz,  $\text{CDCl}_3$ )  $\delta$  7.41–7.34 (m, 5H), 6.89 (dd,  $J = 9.1, 6.7$  Hz, 1H), 6.60 (dt,  $J = 6.6, 1.2$  Hz, 1H), 3.96 (s, 3H), 3.77 (s, 3H), 2.59 (s, 3H).  **$^{13}\text{C NMR}$**  (101 MHz,  $\text{CDCl}_3$ )  $\delta$  165.6, 163.4, 135.9, 134.3, 133.1, 132.0, 131.8, 128.5, 122.2, 121.7, 117.1, 116.6, 115.5, 114.6, 52.9, 52.2, 21.0. **HRMS (ESI)** calcd for  $\text{C}_{19}\text{H}_{17}\text{ClNO}_4^+$   $[\text{M}+\text{H}]^+$   $m/z$ : 358.0841; found 358.0844.

Dimethyl 1-(2-fluorophenyl)-5-methylindolizine-2,3-dicarboxylate (**4gg**)

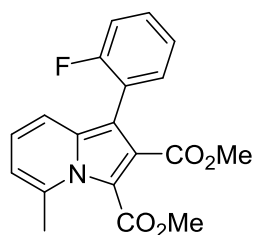

The product was purified by silica gel column chromatography with petroleum ether (60–90°C fraction) and ethyl acetate (PE:EA = 20:1, v/v) as eluent.

Yellow oil, yield 20 mg (30%).  $R_f = 0.21$  (PE: EA = 10:1, v/v).

**$^1\text{H NMR}$**  (400 MHz,  $\text{CDCl}_3$ )  $\delta$  7.41–7.32 (m, 2H), 7.26 (d,  $J = 9.2$  Hz, 1H), 7.20 (td,  $J = 7.4, 1.2$  Hz, 1H), 7.15 (ddd,  $J = 9.6, 8.2, 1.3$  Hz, 1H), 6.85 (dd,  $J = 9.1, 6.7$  Hz, 1H), 6.58 (d,  $J = 6.7$  Hz, 1H), 3.98 (s, 3H), 3.74 (s, 3H), 2.59 (s, 3H).  **$^{13}\text{C NMR}$**  (101 MHz,  $\text{CDCl}_3$ )  $\delta$  165.1, 164.2, 160.6 (d,  $J = 246.5$  Hz), 135.4, 133.8, 132.6 (d,  $J = 2.6$  Hz), 129.2 (d,  $J = 8.0$  Hz), 123.9 (d,  $J = 3.4$  Hz), 121.5, 121.4,



121.2, 118.2, 117.0, 115.6 (d,  $J = 22.3$  Hz), 115.2, 109.1, 53.1, 52.0, 20.5.  $^{19}\text{F}$  NMR (376MHz,  $\text{CDCl}_3$ )  $\delta$  -113.7. HRMS (ESI) calcd for  $\text{C}_{19}\text{H}_{17}\text{FNO}_4^+$   $[\text{M}+\text{H}]^+$   $m/z$ : 342.1136; found 342.1138.

Dimethyl 5-(dimethoxymethyl)-1-phenylindolizine-2,3-dicarboxylate (**4a**)

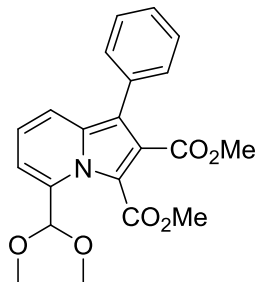

The product was purified by silica gel column chromatography with petroleum ether (60–90°C fraction) and ethyl acetate (PE:EA = 20:1, v/v) as eluent.

Yellow oil, yield 40 mg (53%).  $R_f = 0.28$  (PE: EA = 10:1, v/v).

$^1\text{H}$  NMR (400 MHz,  $\text{CDCl}_3$ )  $\delta$  7.55 (dd,  $J = 8.9, 1.5$  Hz, 1H), 7.44 (s, 2H), 7.43 (d,  $J = 1.6$  Hz, 2H), 7.34 (ddd,  $J = 7.2, 3.7, 2.2$  Hz, 1H), 7.24 (dt,  $J = 7.0, 1.3$  Hz, 1H), 6.97 (dd,  $J = 9.0, 7.0$  Hz, 1H), 5.99 (s, 1H), 3.94 (s, 3H), 3.77 (s, 3H), 3.30 (s, 6H).  $^{13}\text{C}$  NMR (101 MHz,  $\text{CDCl}_3$ )  $\delta$  166.2, 162.7, 134.9, 134.3, 133.2, 130.3, 128.4, 127.2, 123.8, 120.4, 119.3, 117.8, 116.0, 114.3, 98.5, 53.0, 52.6, 52.2.

HRMS (ESI) calcd for  $\text{C}_{21}\text{H}_{22}\text{NO}_6^+$   $[\text{M}+\text{H}]^+$   $m/z$ : 384.1442; found 384.1443.

## 1.6. Gram-scaled Synthesis of 3aa and 4ag

### 1.6.1. Gram-scaled Synthesis of 3aa

To a 35-mL reaction tube were sequentially added (diazo(phenyl)methyl)diphenylphosphine oxides (**1a**) (9.0 mmol, 2.862 g), (*Z*)-1,4-dimethoxy-1,4-dioxo-3-(pyridin-1-ium-1-yl)but-2-ene-2-thiolate (**2a**) (3.0 mmol, 0.759 g), and dry PhCl (20 mL) at room temperature, then the reaction mixture was stirred at 105°C for 10 min under M.W. irradiation. After completion of the reaction, the organic layer was concentrated under reduced pressure to yield the crude product, which was purified by silica gel column chromatography (EtOAc/Petroleum ether) to give the corresponding product **3aa** (53%, 0.707g).

### 1.6.2. Gram-scaled Synthesis of 4ag

To a 35-mL reaction tube were sequentially added (diazo(phenyl)methyl)diphenylphosphine oxides (**1a**) (12.0 mmol, 3.816 g), (*Z*)-1,4-dimethoxy-3-(2-methylpyridin-1-ium-1-yl)-1,4-dioxobut-2-ene-2-thiolate (**2g**) (4.0 mmol, 1.068 g), and dry PhCl (20 mL) at room temperature, then the reaction mixture was stirred at 105°C for 15 min under M.W. irradiation. After completion of the reaction, the organic layer was concentrated under reduced pressure to yield the crude product, which was purified by silica gel column chromatography (EtOAc/Petroleum ether) to give the corresponding product **4ag** (49%, 0.631g).

## 1.7 Applications

(1) To a 10-mL reaction tube were sequentially added dimethyl 1-(diphenylphosphoryl)-1*H*-isothiochromene-3,4-dicarboxylate **3aa** (0.2 mmol, 92.8 mg) and DCM (2 mL) at 0°C, then *m*CPBA (0.48 mmol, 82.8 mg) was added and the reaction mixture was stirred at 0 °C to room temperature for 12 hours. After completion of the reaction, 2 mL of saturated solution of NaHCO<sub>3</sub> was added, and the mixture was stirred well. It was then extracted with DCM (3 × 3 mL). The combined organic layers were washed with brine (1 mL), dried over anhydrous magnesium sulfate, and concentrated under reduced pressure to yield the crude product, which was purified by silica gel column chromatography (EtOAc/petroleum ether 10:1, v/v) to give the corresponding product dimethyl 1-oxo-1*H*-isothiochromene-3,4-dicarboxylate **7** (44 %, 24 mg).

The formation mechanism of product **7** was proposed as shown in Scheme S3. **3aa** first underwent a Bayer-Villiger oxidation with *m*CPBA followed by P-Cope elimination to afford product **7**.

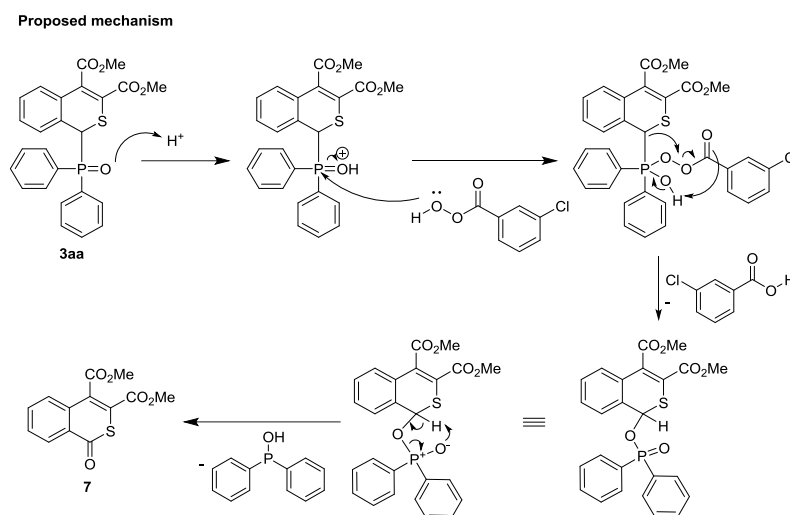

Scheme S3. Proposed mechanism

| Dimethyl 1-oxo-1 <i>H</i> -isothiochromene-3,4-dicarboxylate ( <b>7</b> )                                                                                                                                                                                                                                                                                                                                                                                                                                                                                                                                                                                                                                                                                                                                             |
|-----------------------------------------------------------------------------------------------------------------------------------------------------------------------------------------------------------------------------------------------------------------------------------------------------------------------------------------------------------------------------------------------------------------------------------------------------------------------------------------------------------------------------------------------------------------------------------------------------------------------------------------------------------------------------------------------------------------------------------------------------------------------------------------------------------------------|
|                                                                                                                                                                                                                                                                                                                                                                                                                                                                                                                                                                                                                                                                                                                                                                                                                       |
| The product was purified by silica gel column chromatography with petroleum ether (60–90°C fraction) and ethyl acetate (PE:EA = 10:1, v/v) as eluent.<br>Colorless crystals, yield 24 mg (44%), m.p. 90–91°C. <i>R</i> <sub>f</sub> = 0.38 (PE: EA = 4:1, v/v).<br><sup>1</sup> H NMR (400 MHz, CDCl <sub>3</sub> ) δ 8.37 (dd, <i>J</i> = 7.9, 1.5 Hz, 1H), 7.81 (ddd, <i>J</i> = 8.2, 7.3, 1.5 Hz, 1H), 7.73 (ddd, <i>J</i> = 8.3, 7.3, 1.2 Hz, 1H), 7.61 (dd, <i>J</i> = 8.1, 1.2 Hz, 1H), 4.04 (s, 3H), 3.93 (s, 3H). <sup>13</sup> C NMR (101 MHz, CDCl <sub>3</sub> ) δ 184.9, 167.5, 162.0, 134.6, 133.7, 133.4, 131.7, 129.43, 129.36, 127.3, 126.7, 53.8, 53.5. HRMS (ESI) calcd for C <sub>13</sub> H <sub>11</sub> O <sub>5</sub> S <sup>+</sup> [M+H] <sup>+</sup> <i>m/z</i> : 279.0322; found 279.0319. |

(2) To a 10-mL reaction tube were sequentially added dimethyl 5-(dimethoxymethyl)-1-phenylindolizine-2,3-dicarboxylate **4al** (0.1 mmol, 38.3 mg) and DCM (1 mL), then TFA (10 eq.) was

added and the reaction mixture was stirred at room temperature for 3 hours. After completion of the reaction, the excess of TFA was neutralized with saturated solution of NaHCO<sub>3</sub> and the mixture was extracted with DCM (3 × 3 mL). The combined organic phases were dried over anhydrous Na<sub>2</sub>SO<sub>4</sub>, filtered and concentrated in vacuo. The residue was purified by column chromatography on silica gel to afford the desired product **8** (99%, 34 mg).

Dimethyl 5-formyl-1-phenyl-1,8a-dihydroindolizine-2,3-dicarboxylate (**8**)

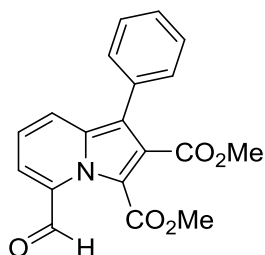

The product was purified by silica gel column chromatography with petroleum ether (60–90°C fraction) and ethyl acetate (PE:EA = 10:1, v/v) as eluent.

Yellow oil, yield 34 mg (99%). R<sub>f</sub> = 0.25 (PE: EA = 4:1, v/v).

<sup>1</sup>H NMR (400 MHz, CDCl<sub>3</sub>) δ 9.77 (s, 1H), 7.80 (dd, *J* = 8.9, 1.3 Hz, 1H), 7.48 (dd, *J* = 6.9, 1.3 Hz, 1H), 7.46–7.42 (m, 4H), 7.41–7.36 (m, 1H), 7.14 (dd, *J* = 8.9, 6.9 Hz, 1H), 3.95 (s, 3H), 3.81 (s, 3H).

<sup>13</sup>C NMR (101 MHz, CDCl<sub>3</sub>) δ 182.0, 165.8, 161.8, 134.1, 133.8, 132.1, 129.8, 128.8, 127.9, 126.1, 124.6, 124.3, 120.8, 118.9, 117.4, 52.6, 52.5. HRMS (ESI) calcd for C<sub>19</sub>H<sub>16</sub>NO<sub>5</sub><sup>+</sup> [M+H]<sup>+</sup> *m/z*: 338.1023; found 338.1024.

(3) To a 10-mL reaction tube were sequentially added dimethyl 5-formyl-1-phenyl-1,8a-dihydroindolizine-2,3-dicarboxylate (**8**) (0.1 mmol, 33.7 mg) and DCM (2 mL), then ethyl 2-(triphenylphosphoranylidene)propionate (0.1 mmol, 36.2 mg) was added and the reaction mixture was stirred at room temperature for 6 hours. After completion of the reaction, the mixture was concentrated in vacuo. The residue was purified by column chromatography on silica gel to afford the desired product dimethyl (*E*)-5-(3-ethoxy-2-methyl-3-oxoprop-1-en-1-yl)-1-phenylindolizine-2,3-dicarboxylate **9** (86%, 36 mg).

Dimethyl (*E*)-5-(3-ethoxy-2-methyl-3-oxoprop-1-en-1-yl)-1-phenylindolizine-2,3-dicarboxylate (**9**)

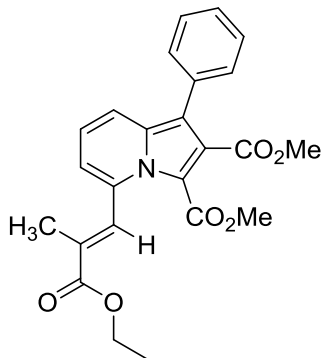

The product was purified by silica gel column chromatography with petroleum ether (60–90°C fraction) and ethyl acetate (PE:EA = 10:1, v/v) as eluent.

Yellow oil, yield 36 mg (86 %). R<sub>f</sub> = 0.38 (PE: EA = 4:1, v/v).

**<sup>1</sup>H NMR** (400 MHz, CDCl<sub>3</sub>) δ 7.53 (dt, *J* = 9.0, 0.9 Hz, 1H), 7.46–7.41 (m, 4H), 7.39–7.33 (m, 2H), 6.99 (dd, *J* = 9.0, 6.9 Hz, 1H), 6.82 (dt, *J* = 6.9, 1.2 Hz, 1H), 4.30 (q, *J* = 7.1 Hz, 2H), 3.87 (s, 3H), 3.77 (s, 3H), 2.19 (d, *J* = 1.6 Hz, 3H), 1.36 (t, *J* = 7.1 Hz, 3H). **<sup>13</sup>C NMR** (101 MHz, CDCl<sub>3</sub>) δ 167.8, 165.6, 162.3, 134.0, 133.4, 132.9, 132.0, 130.7, 130.2, 128.4, 127.3, 123.3, 120.8, 119.2, 117.6, 117.1, 117.0, 61.3, 52.3, 15.0, 14.4. **HRMS (ESI)** calcd for C<sub>24</sub>H<sub>24</sub>NO<sub>6</sub><sup>+</sup> [M+H]<sup>+</sup> *m/z*: 422.1598; found 422.1601.

## 2. Control Experiments

### 2.1. Control experiments

In the control experiment on the formation of product **4ag**, a byproduct **6** was obtained in 45% yield. It was generated from the nucleophilic addition of diphenylphosphinothioic *O*-acid (generated via sulfur oxidation of hydroxydiphenylphosphane to phosphene ((diphenylmethylene)(phenyl)phosphine oxide generated from **1a** via the Wolff rearrangement<sup>11</sup>). This byproduct **6** provided a perfect experimental evidence for our proposed mechanism in Scheme 2. Its formation mechanism is proposed in Scheme S4. As shown in Scheme 2, during the formation of products **4**, both sulfur and hydroxydiphenylphosphane generate and takes place a sulfurization to yield diphenylphosphinothioic *O*-acid. In the same time, diazo compound **1a** undergoes a Wolff rearrangement to form phosphene [(diphenylmethylene)(phenyl)phosphine oxide] under microwave irradiation. The nucleophilic addition of diphenylphosphinothioic *O*-acid to the phosphene generates the byproduct **6** because the phosphene is more oxyphilic.

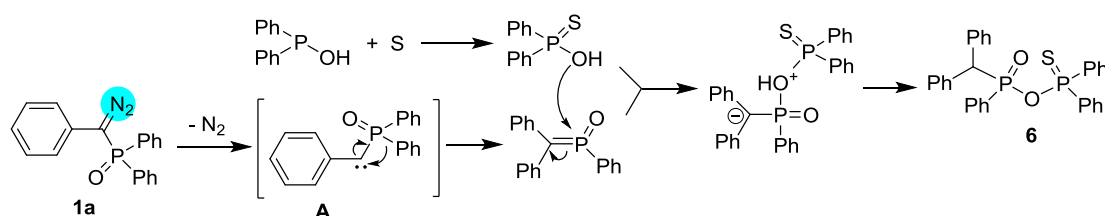

**Scheme S4.** Proposed mechanism for the formation of byproduct **6**.

Verification of structure of byproduct **6**.

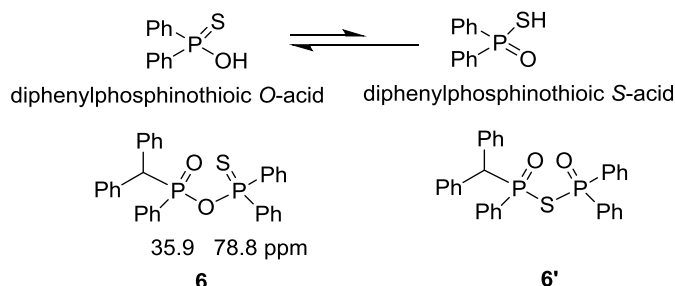

<sup>31</sup>P NMR chemical shifts of some closely related compounds

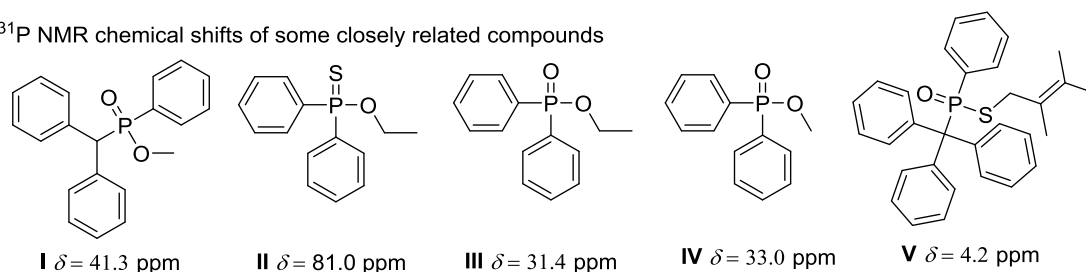

**Scheme S5.** Structural identification of byproduct **6** and <sup>31</sup>P NMR chemical shifts of some closely related compounds

The originally generated diphenylphosphinothioic *O*-acid can tautomerize to diphenylphosphinothioic *S*-acid in the reaction mixture. Both of them can undergo nucleophilic addition with the phosphene to

generate benzhydryl(phenyl)phosphinic diphenylphosphinothioic anhydride (**6**) or benzhydryl(phenyl)phosphinic diphenylphosphinic thioanhydride (**6'**). Both the *O*-acid and *S*-acid can possibly generate anhydride **6** or thioanhydride **6'**. The byproduct shows two phosphorus peaks at 35.9 and 78.8 ppm in its  $^{31}\text{P}$  NMR spectrum. To identify the structure of the byproduct, we surveyed literature to find some closely related compounds **I** to **V** listed in Scheme S5. Their  $^{31}\text{P}$  chemical shifts are 31.4 ppm for methyl benzhydryl(phenyl)phosphinate (**I**),<sup>7</sup> 81.0 ppm for *O*-ethyl diphenylphosphinothioate (**II**),<sup>8</sup> 31.4 and 33.0 ppm for ethyl and methyl diphenylphosphinates (**III** and **IV**),<sup>8</sup> and 4.2 ppm for *S*-(2,3-dimethylbut-2-en-1-yl) phenyl(trityl)phosphinothioate.<sup>9</sup> By referring these reported chemical shifts, the byproduct should be more likely to be benzhydryl(phenyl)phosphinic diphenylphosphinothioic anhydride (**6**) rather than benzhydryl(phenyl)phosphinic diphenylphosphinic thioanhydride (**6'**). The results indicate that the phosphene is more oxyphilic although the sulfur is more nucleophilic than the oxygen in diphenylphosphinothioic *O*-acid. This is very different from the reactions of ketenes and thiolacetic acid, in which the sulfur of thiolacetic acid predominantly nucleophilically attacks ketenes, generating the corresponding thioanhydrides.<sup>10</sup>

Benzhydryl(phenyl)phosphinic diphenylphosphinothioic anhydride (**6**)

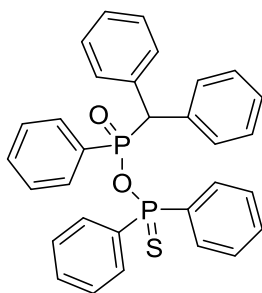

The product was purified by silica gel column chromatography with petroleum ether (60–90°C fraction) and ethyl acetate (PE:EA = 10:1, *v/v*) as eluent.

Red oil, yield 47 mg (45%).  $R_f$  = 0.25 (PE: EA = 4:1, *v/v*).

$^1\text{H NMR}$  (400 MHz,  $\text{CDCl}_3$ )  $\delta$  7.71–7.63 (m, 4H), 7.55–7.44 (m, 5H), 7.43–7.36 (m, 4H), 7.35–7.27 (m, 5H), 7.25–7.17 (m, 4H), 7.16–7.07 (m, 3H), 4.90 (d,  $J$  = 17.1 Hz, 1H).  $^{13}\text{C NMR}$  (101 MHz,  $\text{CDCl}_3$ )  $\delta$  136.1 (d,  $J$  = 7.9 Hz), 135.5, 134.9, 133.9 (d,  $J$  = 26.9 Hz), 133.0, 132.6, 132.2, 132.1, 132.0 (d,  $J$  = 2.8 Hz), 131.5 (d,  $J$  = 12.7 Hz), 130.9, 130.3 (d,  $J$  = 6.8 Hz), 130.1, 129.8 (d,  $J$  = 8.3 Hz), 128.8 (d,  $J$  = 15.3 Hz), 128.4 (d,  $J$  = 14.2 Hz), 128.1 (d,  $J$  = 13.9 Hz), 127.4 (d,  $J$  = 22.6 Hz), 55.1 (d,  $J$  = 93.0 Hz).  $^{31}\text{P NMR}$  (162 MHz,  $\text{CDCl}_3$ )  $\delta$  78.8 (d,  $J$  = 43.3 Hz), 35.9 (d,  $J$  = 43.0 Hz). **HRMS (ESI)** calcd for  $\text{C}_{31}\text{H}_{27}\text{O}_2\text{P}_2\text{S}^+$   $[\text{M}+\text{H}]^+$   $m/z$ : 525.1202; found 525.1205.

## 2.2. Additional control experiments on the possible radical process

It was reported that arenecarbonyl diphenylphosphine oxides or diarenecarbonyl phenylphosphine oxides underwent radical reactions under photo irradiation<sup>10</sup> or under Pd-catalyzed conditions<sup>11</sup> and arenecarbonylphosphonates underwent radical reaction as well under Co-catalyzed conditions.<sup>12</sup> In our current reaction, compound **5** was a possible intermediate in the reaction. If it underwent a radical elimination, it also gave product **4aa**. To examine whether the reaction was a radical process, several control reactions were designed and carried out. Although the reaction of diphenyl(2,4,6-methylbenzoyl)phosphine oxide and 1,2-diphenyldisulfane (phenyl disulfide) produced *S*-phenyl

diphenylphosphinothioate and *S*-phenyl 2,4,6-methylbenzothioate in excellent yields under photo irradiation ( $330 \text{ nm} < \lambda < 400 \text{ nm}$ ), neither TEMPO-captured product nor *S*-phenyl diphenylphosphinothioate (**16**) were observed in our control experiments (Scheme S5). The results ruled out the radical process and support the P-Cope elimination as the key step.

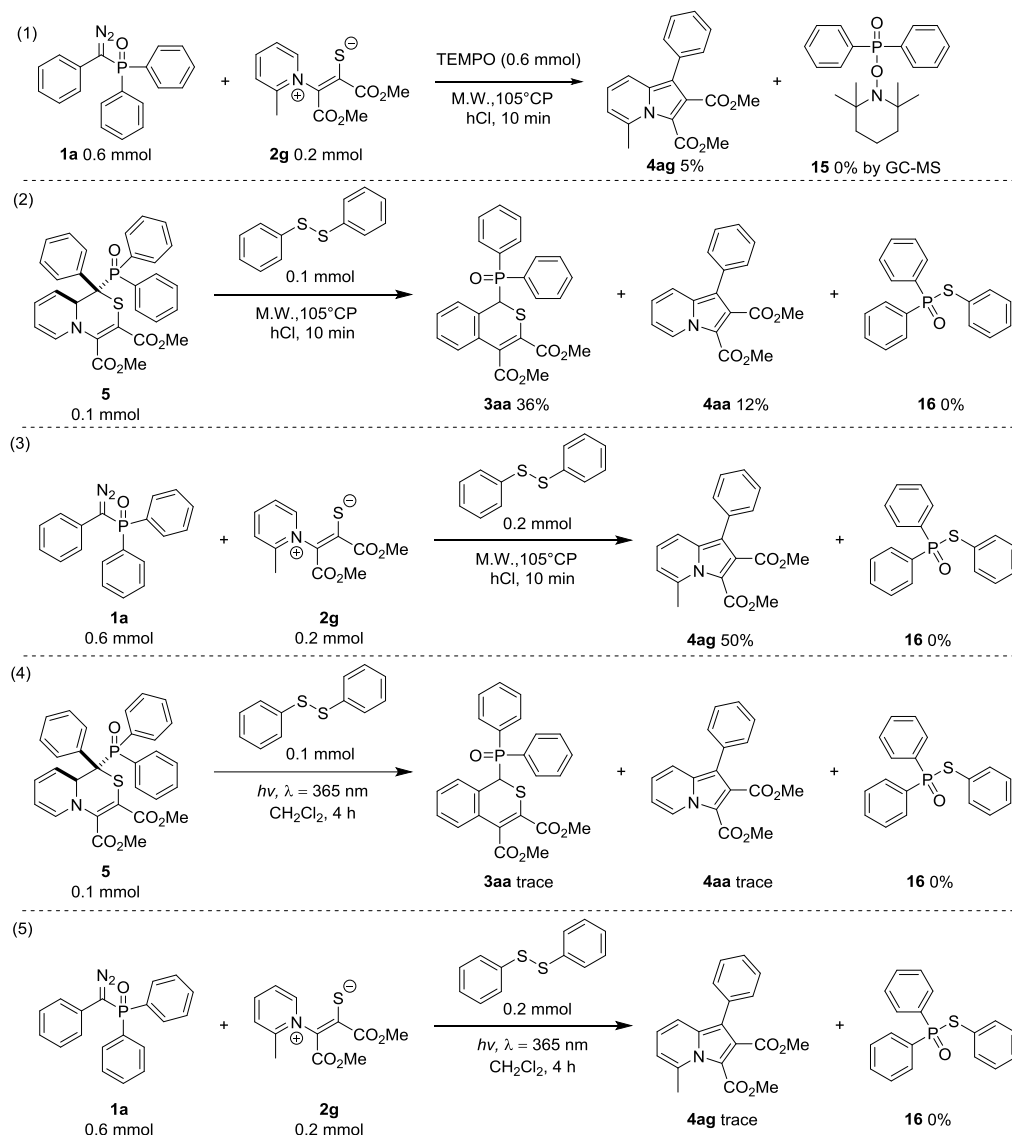

**Scheme S4.** Control experiments

#### Procedures of additional control experiments

(1) To a 10-mL reaction tube were sequentially added (diazo(phenyl)methyl)diphenylphosphine oxide (**1a**) (0.6 mmol, 191 mg), (*Z*)-1,4-dimethoxy-3-(2-methylpyridin-1-ium-1-yl)-1,4-dioxbut-2-ene-2-thiolate (**2g**) (0.2 mmol, 53.4 mg), TEMPO (0.6 mmol, 93.6 mg), and PhCl (3 mL) at room temperature, then the reaction mixture was stirred at 105 °C for 10 min under M.W. irradiation. Product 5% **4ag** was obtained in 5% yield and no 2,2,6,6-tetramethylpiperidin-1-yl diphenylphosphinate (**15**) was observed by GC-MS analysis of the reaction mixture.

(2) To a 10-mL reaction tube were sequentially added dimethyl *rel*-(1*R*,9*aS*)-1-(diphenylphosphoryl)-1-



phenyl-1,9a-dihydropyrido[2,1-*c*][1,4]thiazine-3,4-dicarboxylate (**5**) (0.1 mmol, 54.3 mg), 1,2-diphenyldisulfane (0.1 mmol, 21.8 mg), and PhCl (1 mL) at room temperature, then the reaction mixture was stirred at 105°C for 10 min under M.W. irradiation. **3aa** and **4aa** were obtained in 36% and 12% yields, respectively. But no *S*-phenyl diphenylphosphinothioate (**16**) was found after reaction.

(3) To a 10-mL reaction tube were sequentially added (diazo(phenyl)methyl)diphenylphosphine oxide (**1a**) (0.6 mmol, 191 mg), (*Z*)-1,4-dimethoxy-3-(2-methylpyridin-1-ium-1-yl)-1,4-dioxobut-2-ene-2-thiolate (**2g**) (0.2 mmol, 53.4 mg), 1,2-diphenyldisulfane (0.2 mmol, 43.6 mg), and PhCl (3 mL) at room temperature, then the reaction mixture was stirred at 105°C for 10 min under M.W. irradiation. And **4ag** was obtained in 50% yield without observation of *S*-phenyl diphenylphosphinothioate (**16**) after the reaction.

(4) To a 20-mL reaction tube were sequentially added dimethyl *rel*-(1*R*,9*aS*)-1-(diphenylphosphoryl)-1-phenyl-1,9a-dihydropyrido[2,1-*c*][1,4]thiazine-3,4-dicarboxylate (**5**) (0.2 mmol, 108.6 mg), 1,2-diphenyldisulfane (0.2 mmol, 43.6 mg), and DCM (8 mL) at room temperature, then the reaction mixture was stirred at room temperature for 4 h under photo irradiation ( $\lambda = 365\text{nm}$ ). After reaction, only a trace amount of **3aa** and **4aa** were observed, but **16** was not by GC-MS analysis of the reaction mixture.

(5) To a 20-mL reaction tube were sequentially added (diazo(phenyl)methyl)diphenylphosphine oxide (**1a**) (0.6 mmol, 191 mg), (*Z*)-1,4-dimethoxy-3-(2-methylpyridin-1-ium-1-yl)-1,4-dioxobut-2-ene-2-thiolate (**2g**) (0.2 mmol, 53.4 mg), 1,2-diphenyldisulfane (0.2 mmol, 43.6 mg), and DCM (8 mL) at room temperature, then the reaction mixture was stirred at room temperature for 4 h under photo irradiation ( $\lambda = 365\text{nm}$ ). After reaction, only a trace amount of **4ag** was observed, but **16** was not by GC-MS analysis of the reaction mixture.

### 3. References

1. Y. Luo, Z. Fu, X. Fu, C. Du and J. Xu, *Org. Biomol. Chem.*, 2020, **18**, 9526–9537.
2. Y. Luo and J. Xu, *Org. Lett.*, 2020, **22**, 7780–7785.
3. S. Sun, Y. Wei and J. Xu, *Org. Lett.*, 2022, **24**, 6024–6030.
4. L. Moafi, S. Ahadi, H. R. Khavasi and A. Bazgir, *Synthesis*, 2011, **9**, 1399–1402.
5. B. Cheng, Y. Li, T. Wang, X. Zhang, H. Li, Y. He, Y. Li and H. Zhai, *J. Org. Chem.*, 2020, **85**, 6794–6802.
6. B. Cheng, Y. Li, X. Zhang, S. Duan, H. Li, Y. He, Y. Li, T. Wang and H. Zhai, *Org. Lett.*, 2020, **22**, 5817–5821.
7. A. I. Arkhynchuk, N. D'Imperio and S. Ott, *Chem. Commun.*, 2019, **55**, 6030–6033.
8. N. P. Kenny, K. V. Rajendran and D. G. Gilheany, *Chem. Commun.*, 2015, **51**, 16561–16564.
9. P. L. Folkins, B. R. Vincent and D. N. Harpp, *Tetrahedron Lett.*, 1991, **32**, 7009–7012.
10. H. C. Shin and D. M. Quinn, *Lipids*, 1993, **28**, 73–74.
11. Y. Sato, S.-i. Kawaguchi, A. Nomoto and A. Ogawa, *Synthesis*, 2017, **49**, 3558–3567.
12. F. Mäsing, H. Nüsse, J. Klingauf and A. Studer, *Org. Lett.*, 2017, **19**, 2658–2661.
13. B. Zhang, J. He, Y. Li, T. Song, Y. Fang and C. Li, *J. Am. Chem. Soc.*, 2021, **143**, 4955–4961.

## 4. Copies of $^1\text{H}$ , $^{13}\text{C}$ , $^{31}\text{P}$ , $^{19}\text{F}$ NMR, and HRMS Spectra of Products

### 4.1. Copies of $^1\text{H}$ and $^{31}\text{P}$ NMR Spectra of Diazo Compounds 1

#### **(4-Chlorophenyl)(diazo)methyl)diphenylphosphine oxide (1e)**

#### **$^1\text{H}$ NMR (400MHz, $\text{CDCl}_3$ )**

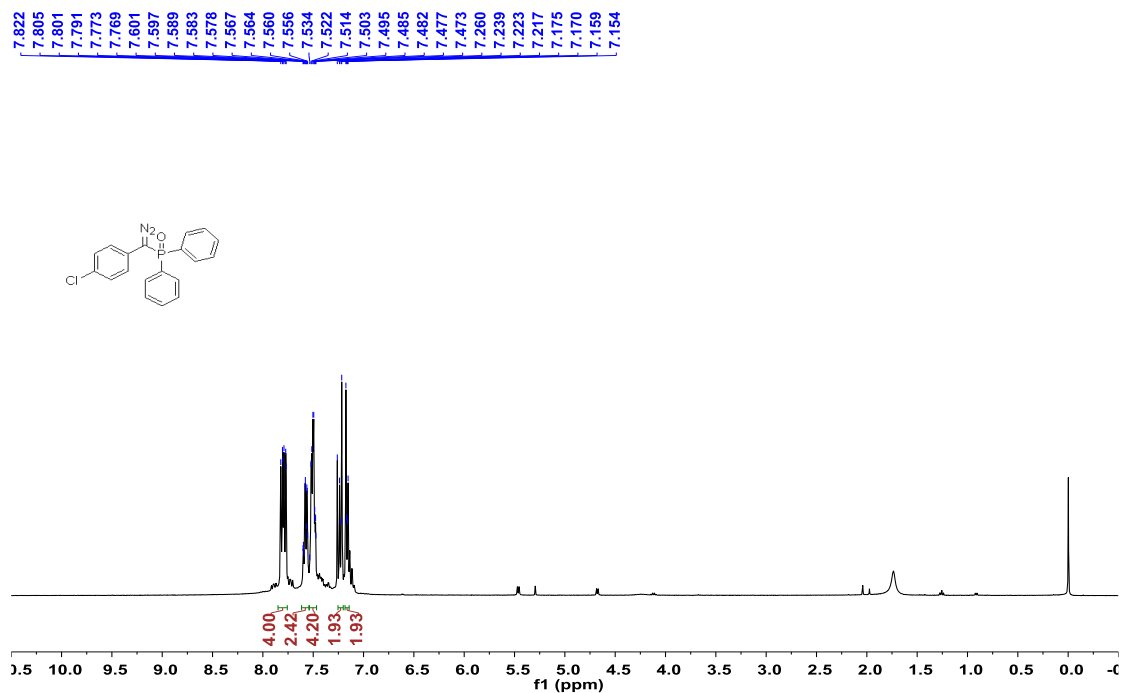

#### **$^{31}\text{P}$ NMR (162 MHz, $\text{CDCl}_3$ )**

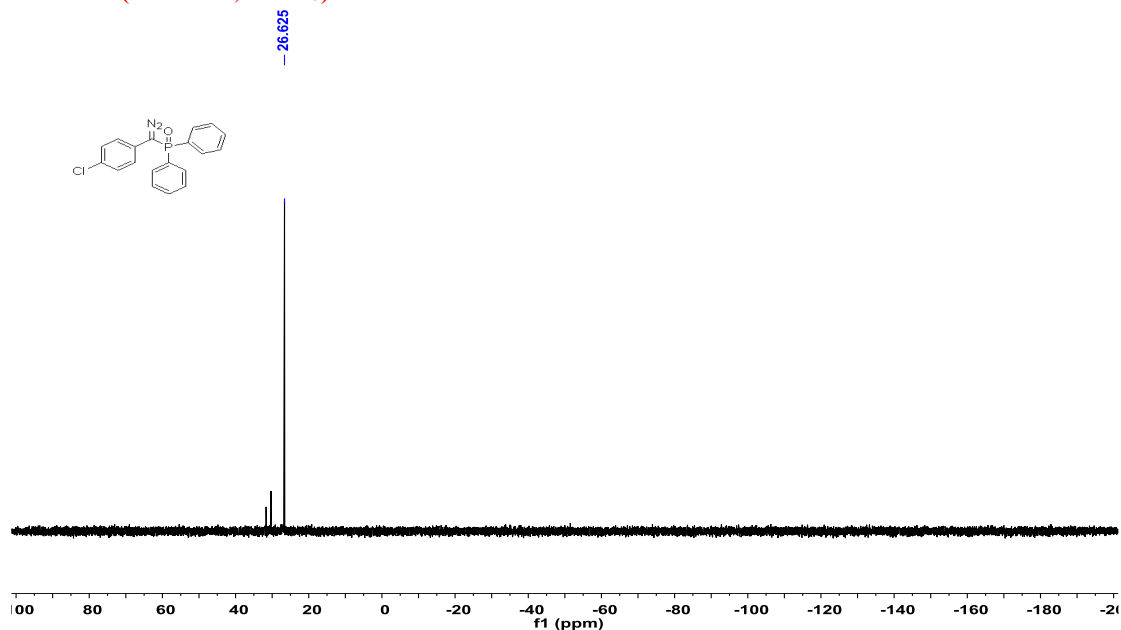

## 4.2. Copies of $^1\text{H}$ , $^{13}\text{C}$ NMR and HRMS Spectra of Pyridinium 1,4-zwitterionic Thiolates

2

### (Z)-1,4-Dioxo-1,4-bis(pentan-3-yloxy)-3-(pyridin-1-ium-1-yl)but-2-ene-2-thiolate (2c)

#### $^1\text{H}$ NMR (400MHz, $\text{CDCl}_3$ )

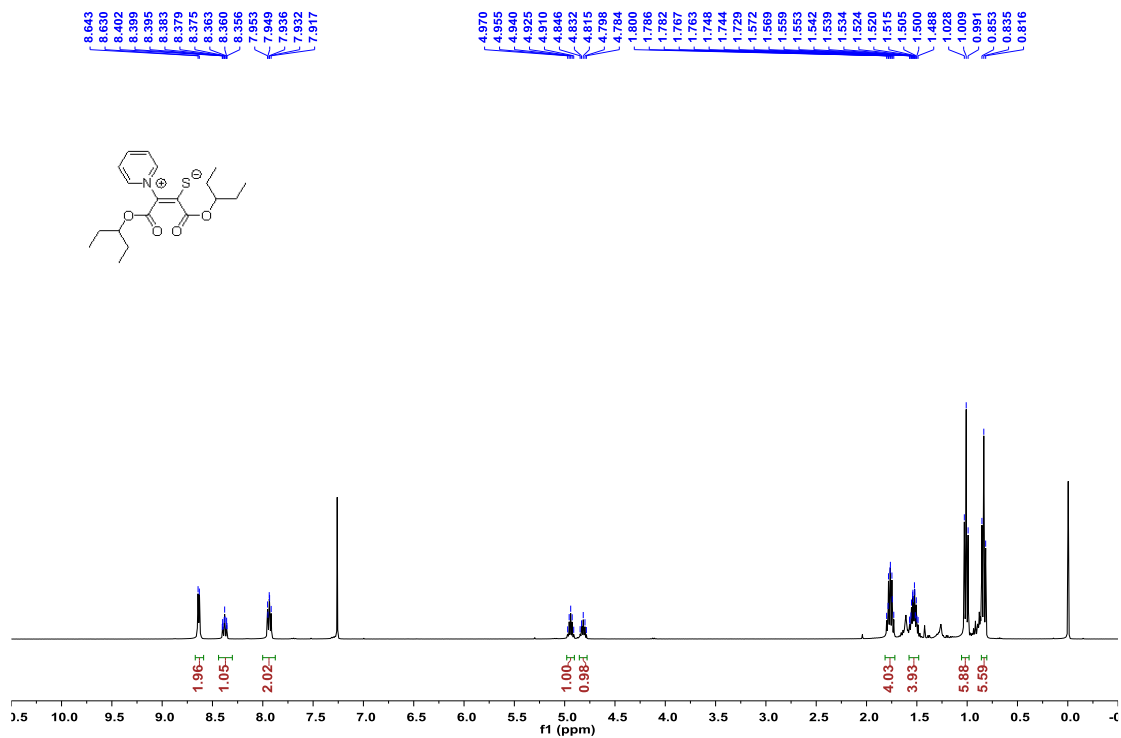

#### $^{13}\text{C}$ NMR (101MHz, $\text{CDCl}_3$ )

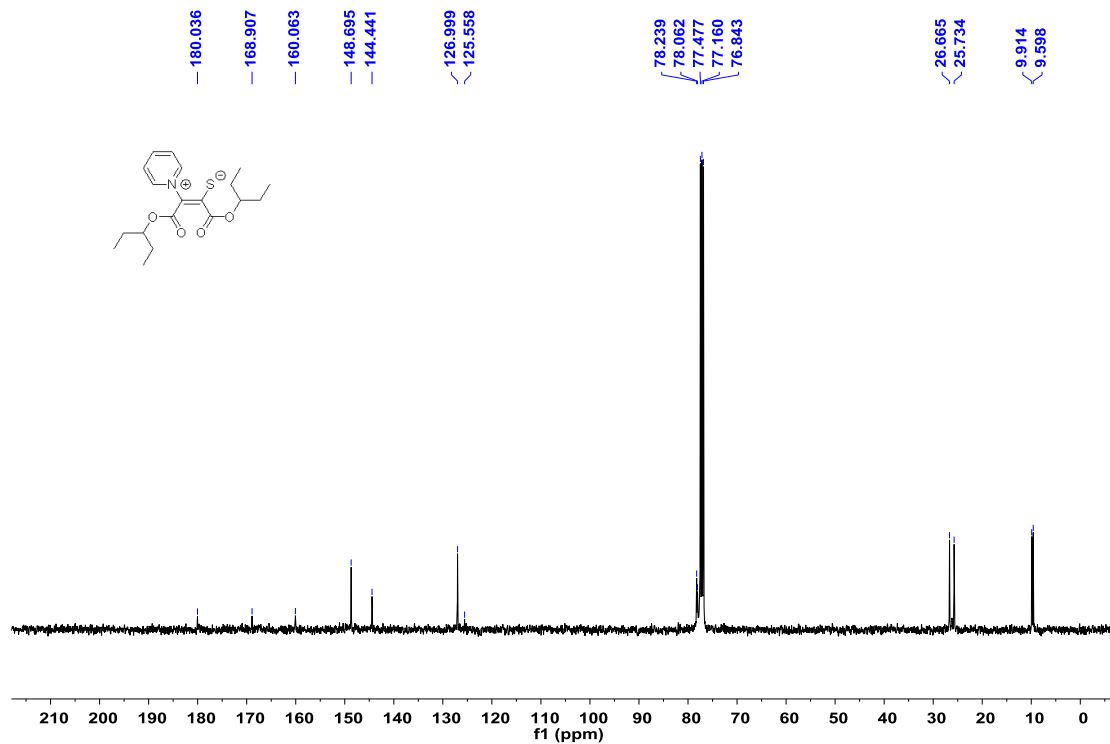

## HRMS

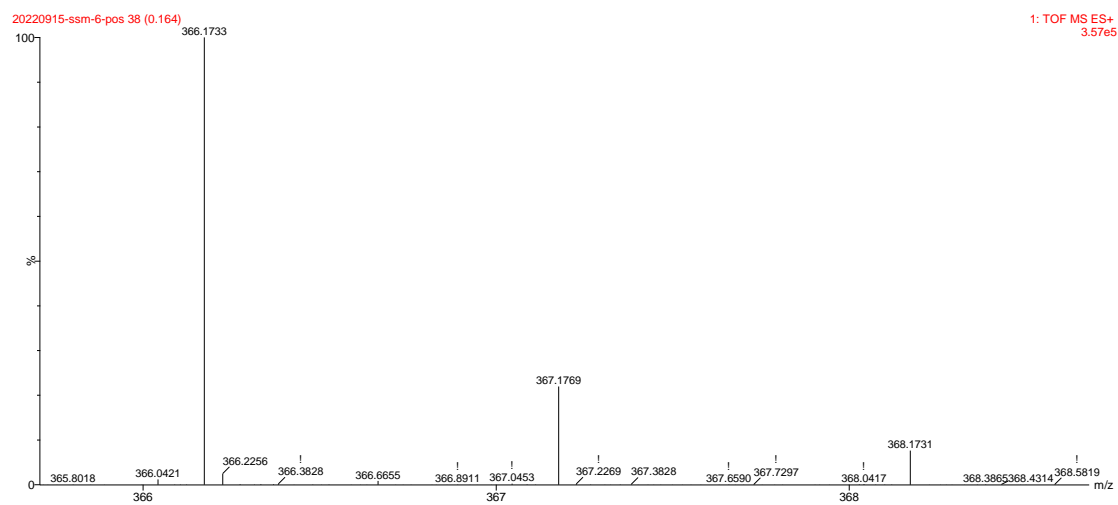

## (Z)-1,4-Di-tert-butoxy-1,4-dioxo-3-(pyridin-1-ium-1-yl)but-2-ene-2-thiolate (2d)

### <sup>1</sup>H NMR (400MHz, CDCl<sub>3</sub>)

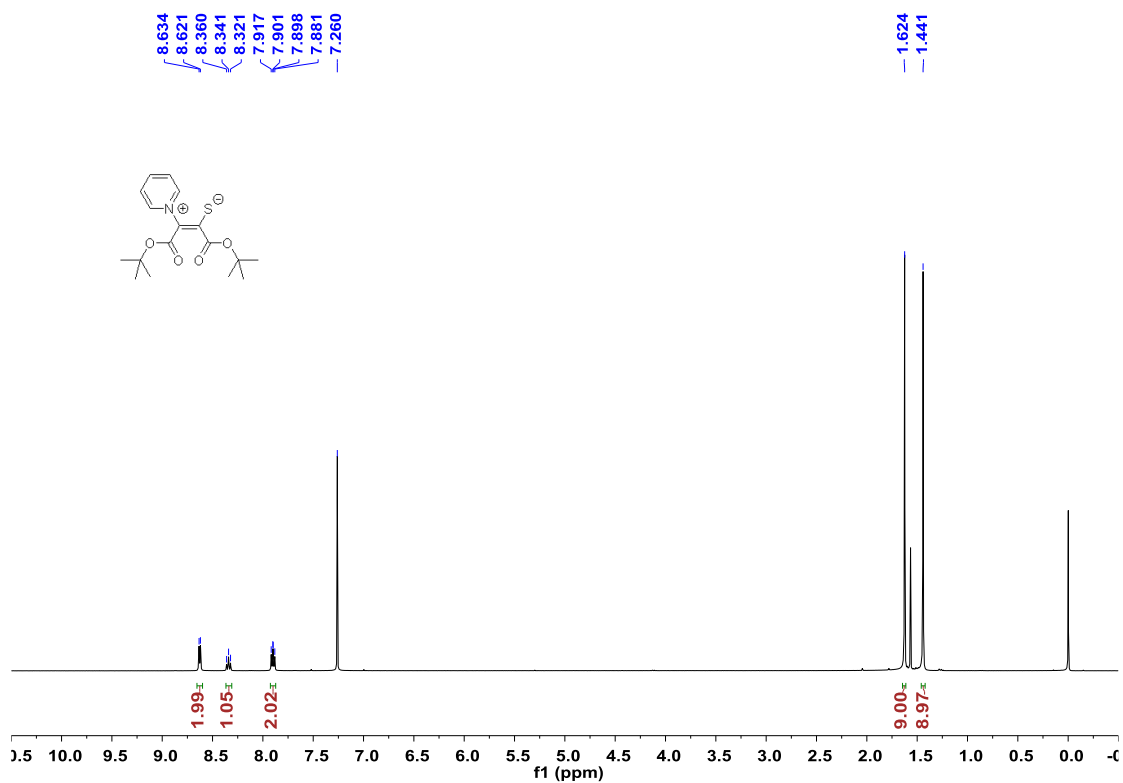

**(Z)-1-(Furan-2-yl)-4-methoxy-1,4-dioxo-3-(pyridin-1-ium-1-yl)but-2-ene-2-thiolate (2f)**

**<sup>1</sup>H NMR (400MHz, CDCl<sub>3</sub>)**

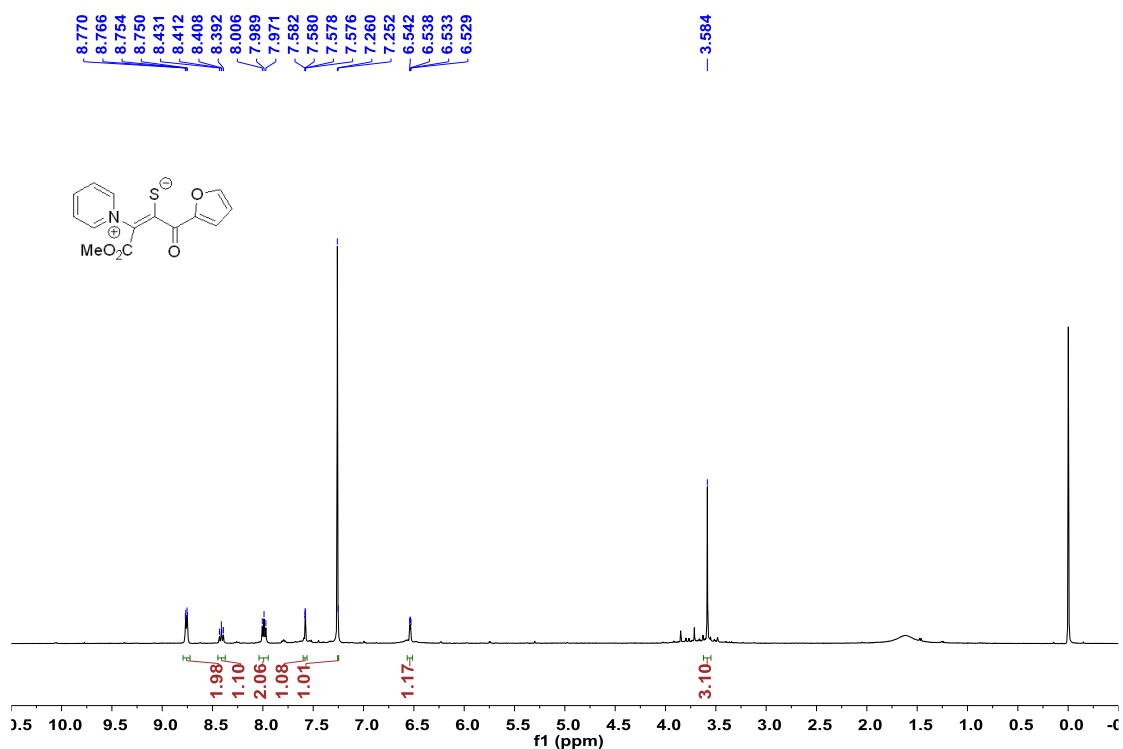

**(Z)-3-(2-Ethylpyridin-1-ium-1-yl)-1,4-dimethoxy-1,4-dioxobut-2-ene-2-thiolate (2j)**

**<sup>1</sup>H NMR (400MHz, CDCl<sub>3</sub>)**

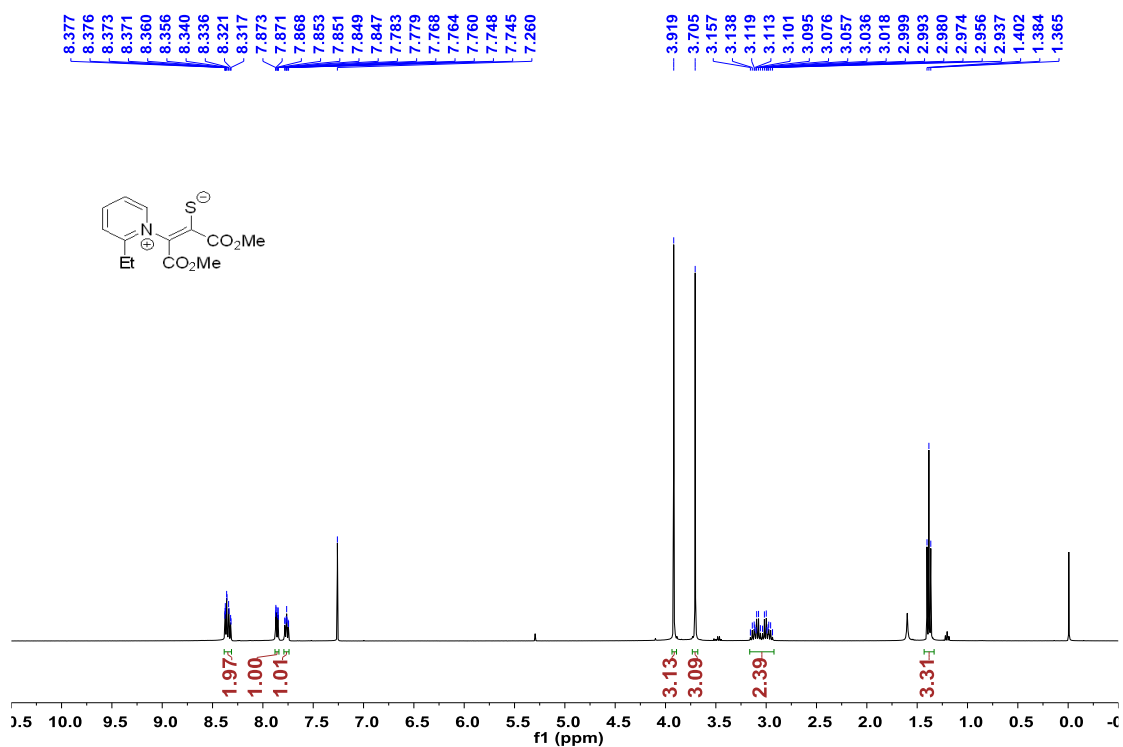

**(Z)-3-(2-(Dimethoxymethyl)pyridin-1-ium-1-yl)-1,4-dimethoxy-1,4-dioxobut-2-ene-2-thiolate (2I)**

**<sup>1</sup>H NMR (400MHz, CDCl<sub>3</sub>)**

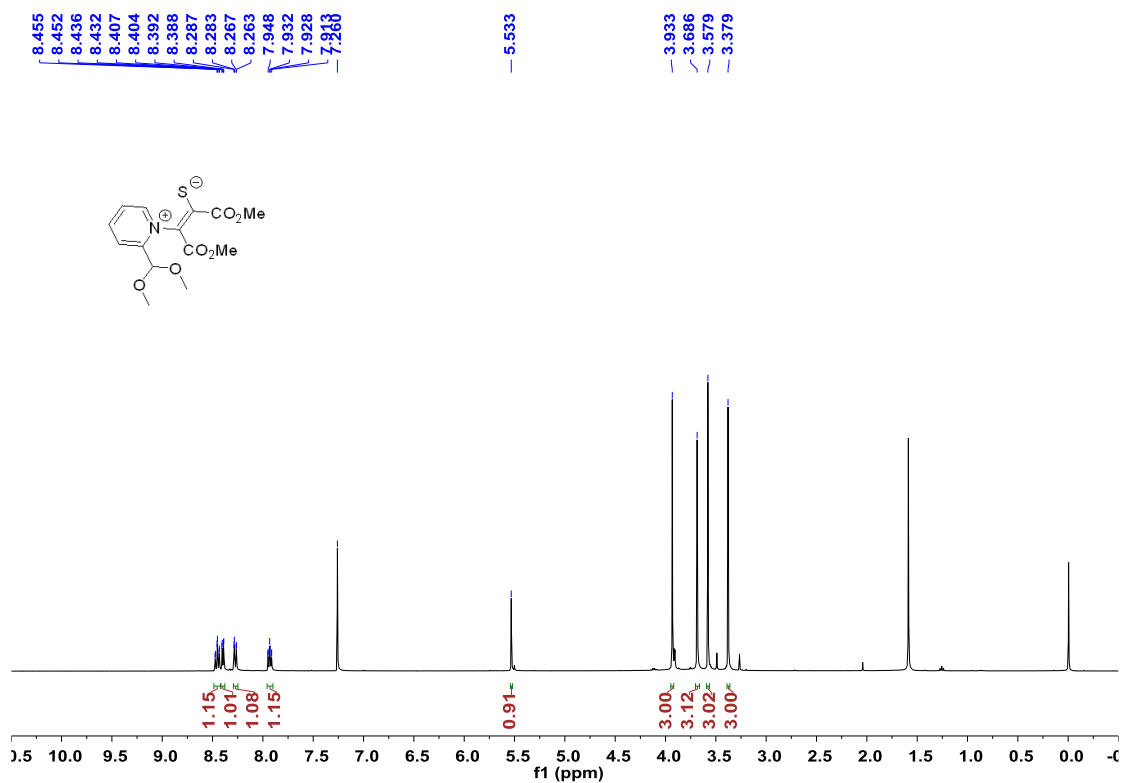

**<sup>13</sup>C NMR (101MHz, CDCl<sub>3</sub>)**

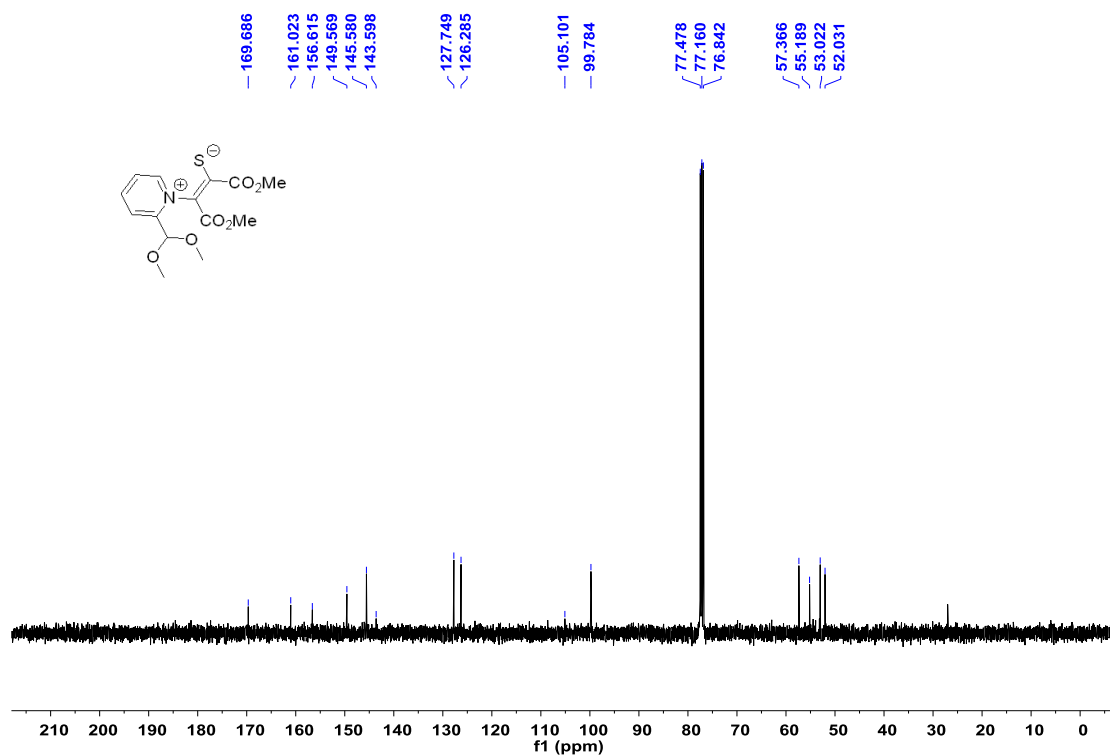

# HRMS

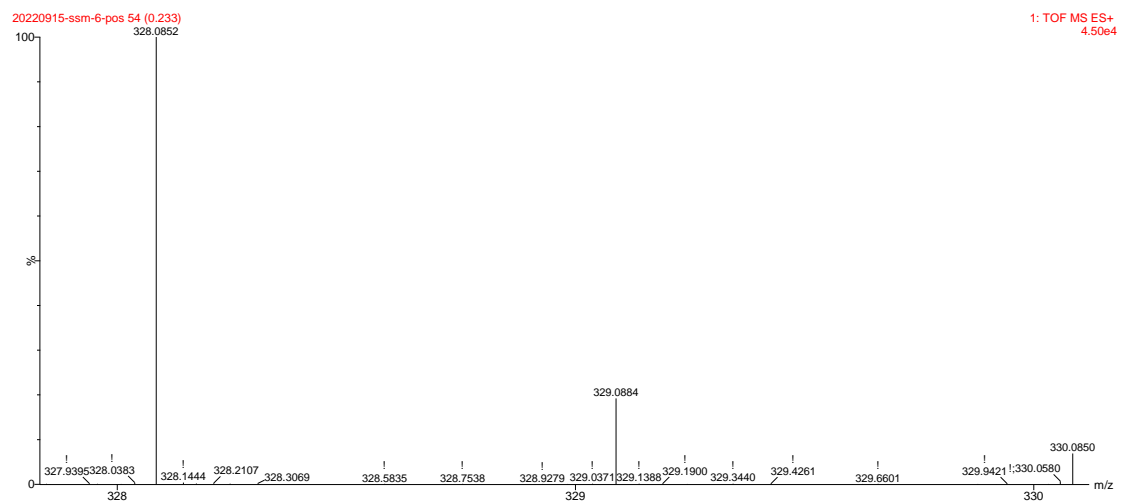



### 4.3. Copies of $^1\text{H}$ , $^{31}\text{P}$ , $^{13}\text{C}$ , $^{19}\text{F}$ NMR and HRMS Spectra of Products 3

#### Dimethyl 1-(diphenylphosphoryl)-1*H*-isothiochromene-3,4-dicarboxylate (3a)

##### $^1\text{H}$ NMR (400MHz, $\text{CDCl}_3$ )

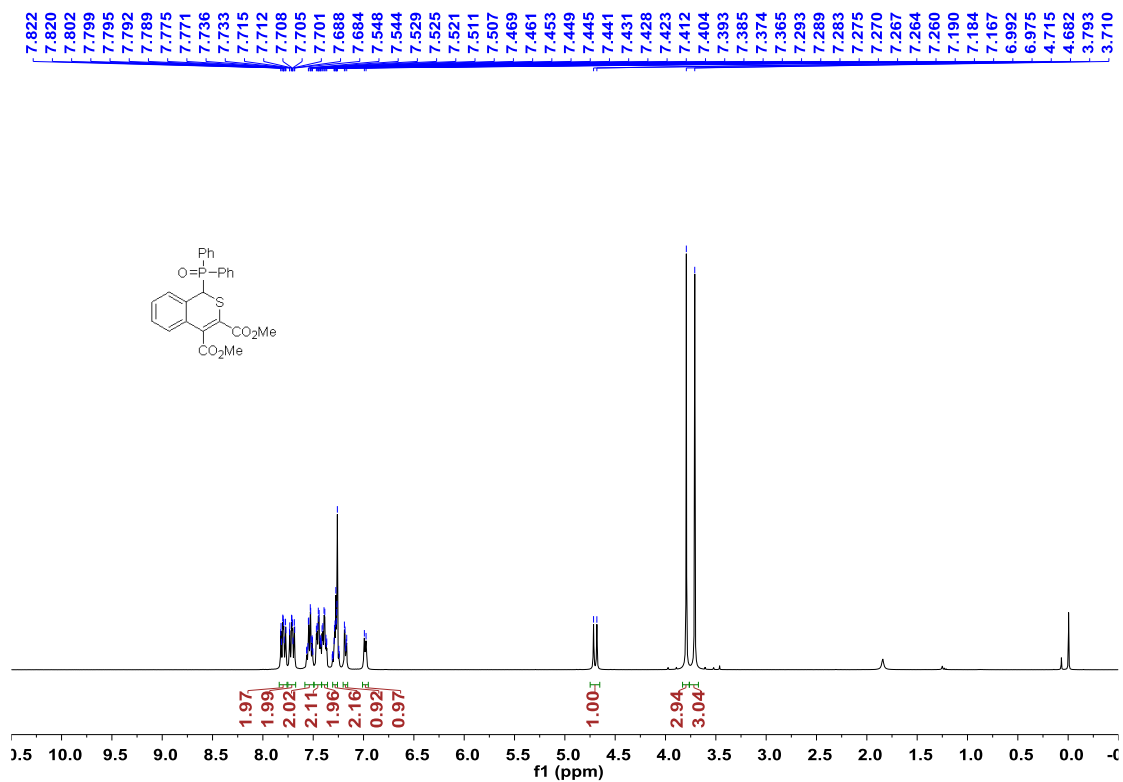

##### $^{31}\text{P}$ NMR (162 MHz, $\text{CDCl}_3$ )

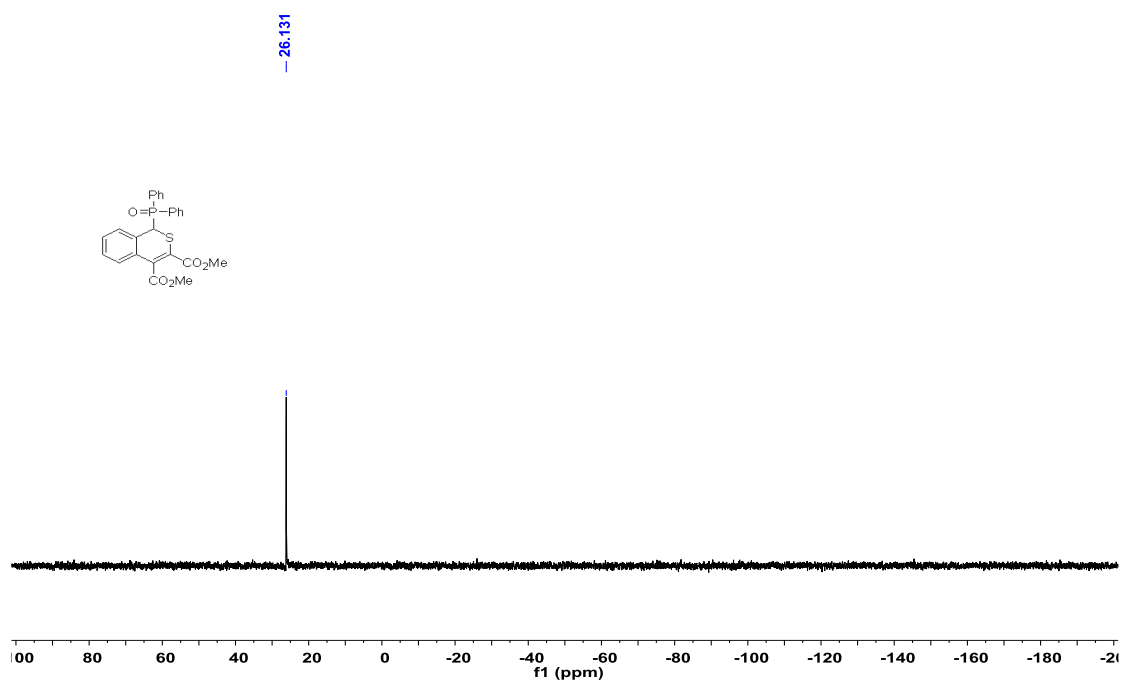

### <sup>13</sup>C NMR (101MHz, CDCl<sub>3</sub>)

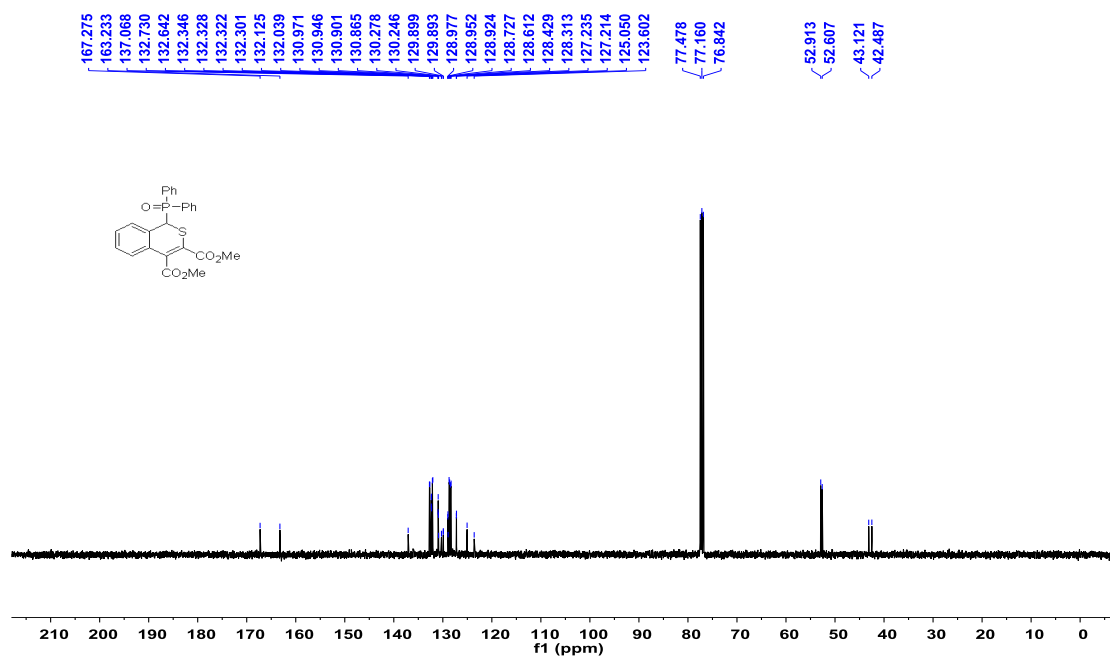

### HRMS

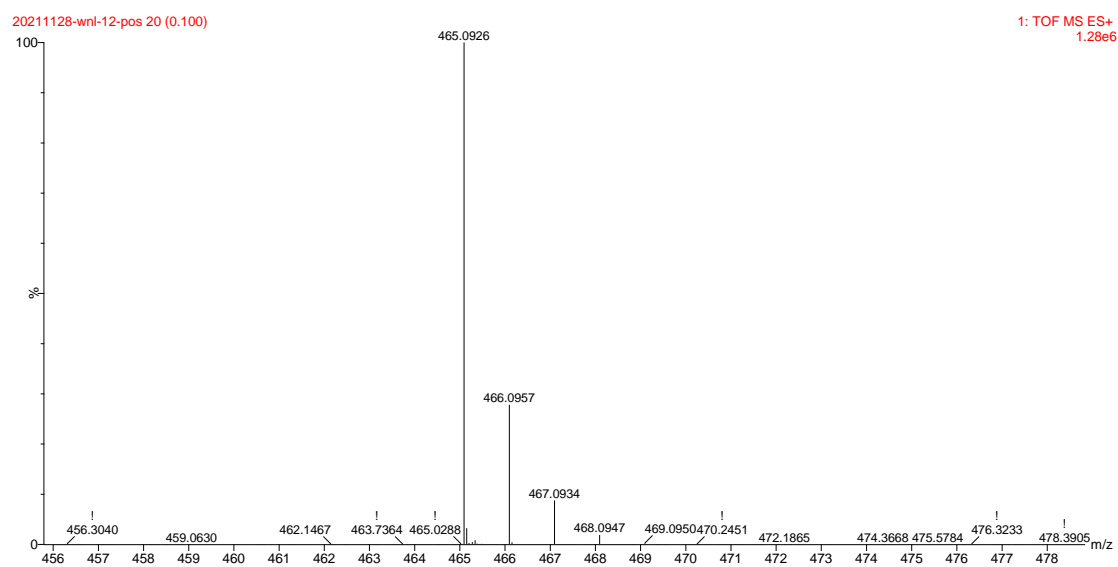

### Dimethyl 1-(diphenylphosphoryl)-6-methyl-1*H*-isothiochromene-3,4-dicarboxylate (3ba)

#### <sup>1</sup>H NMR (400MHz, CDCl<sub>3</sub>)

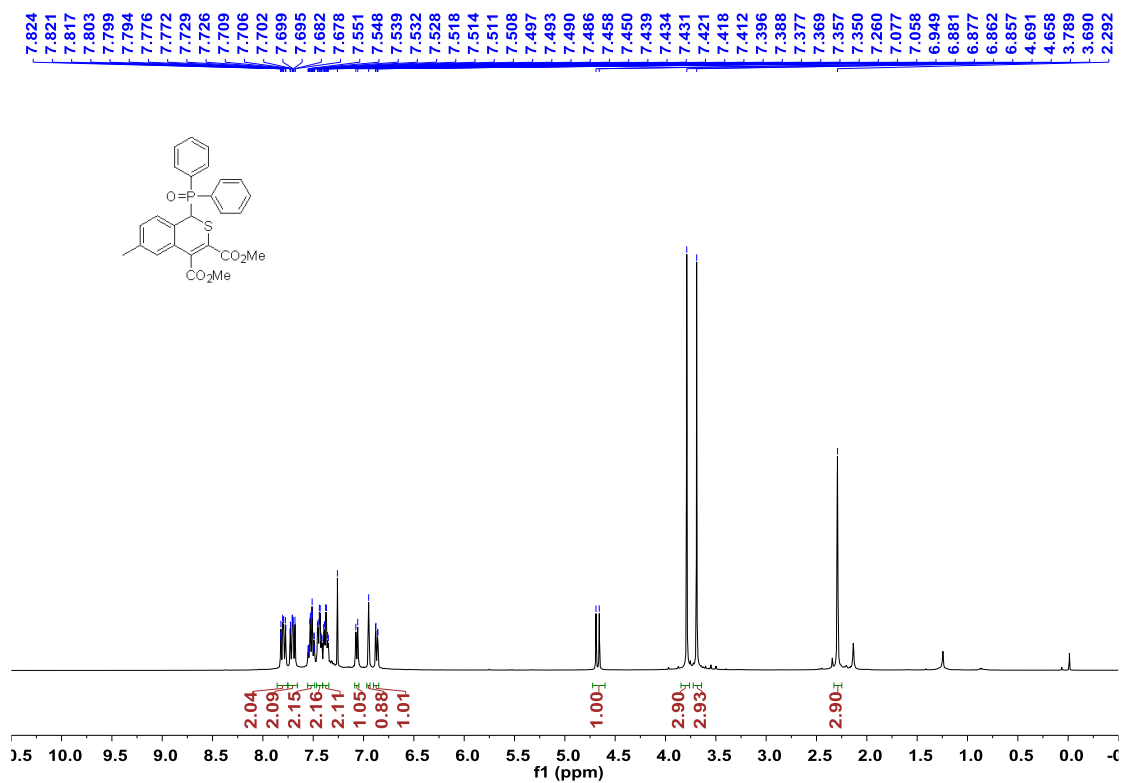

#### <sup>31</sup>P NMR (162 MHz, CDCl<sub>3</sub>)

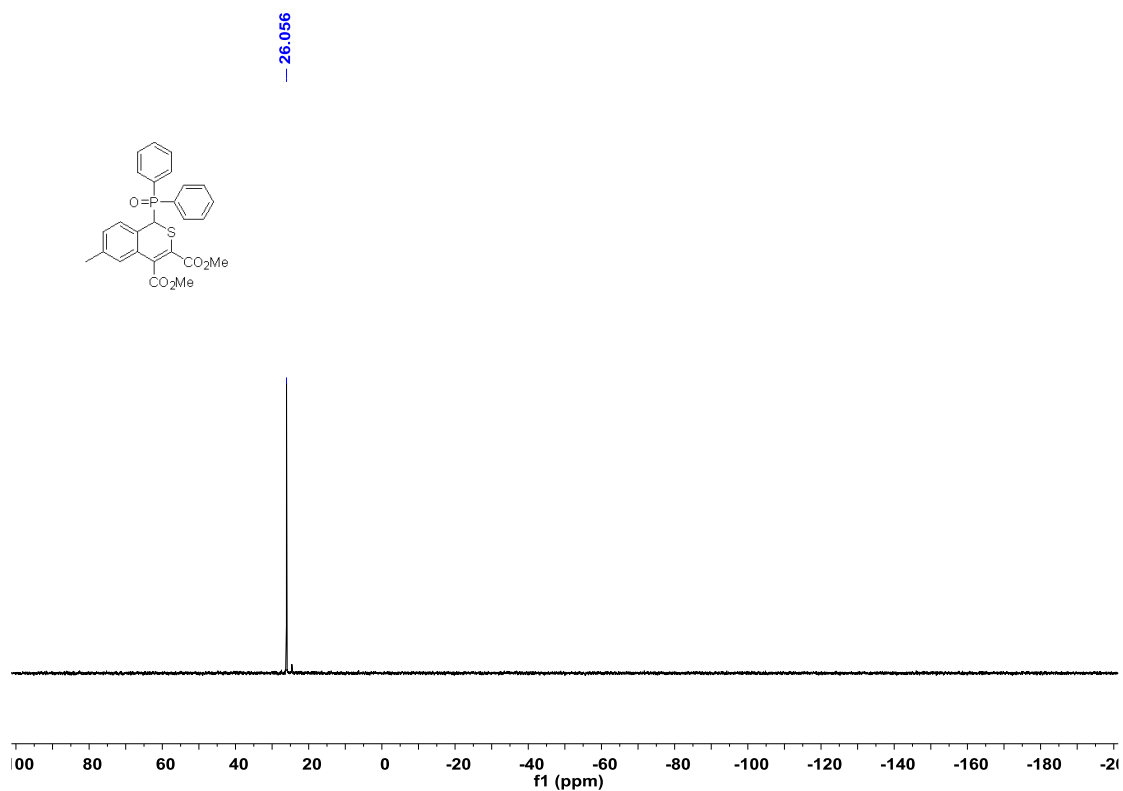

### <sup>13</sup>C NMR (101MHz, CDCl<sub>3</sub>)

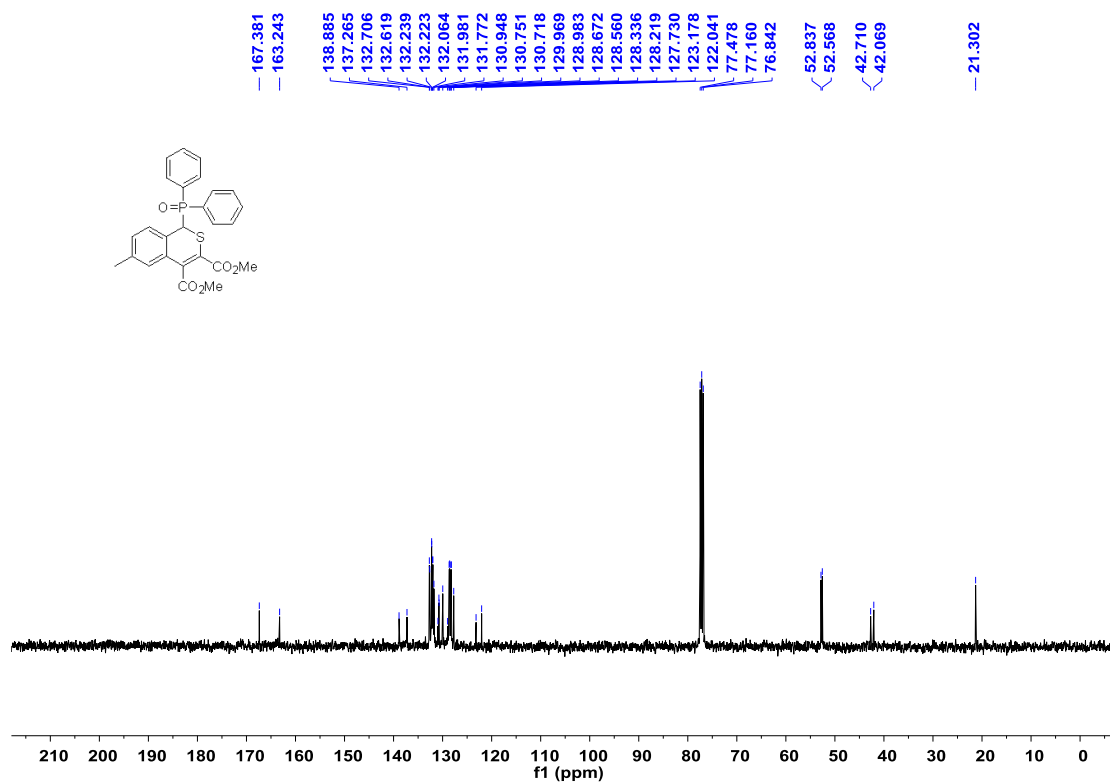

### HRMS

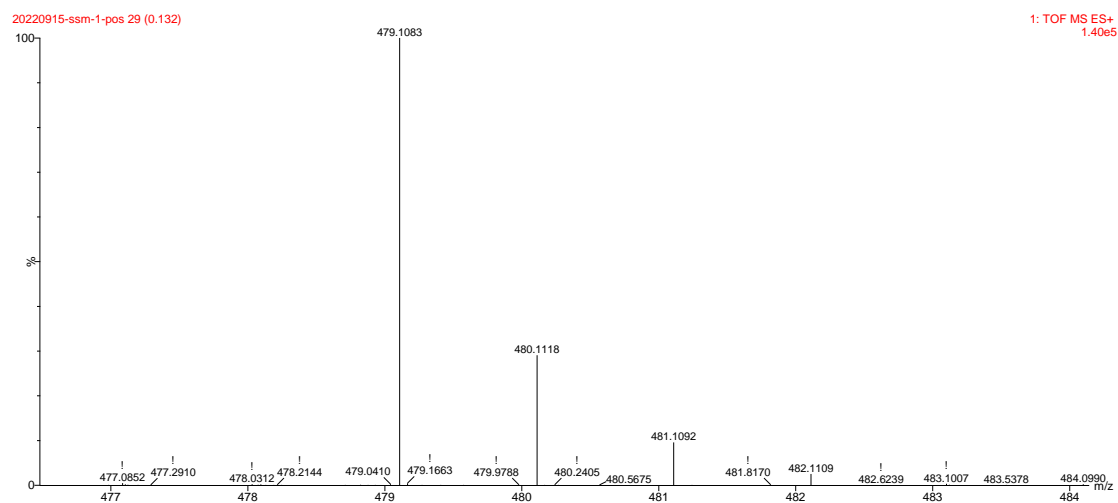

# Dimethyl 6-(*tert*-butyl)-1-(diphenylphosphoryl)-1*H*-isothiochromene-3,4-dicarboxylate (3ca)

## <sup>1</sup>H NMR (400MHz, CDCl<sub>3</sub>)

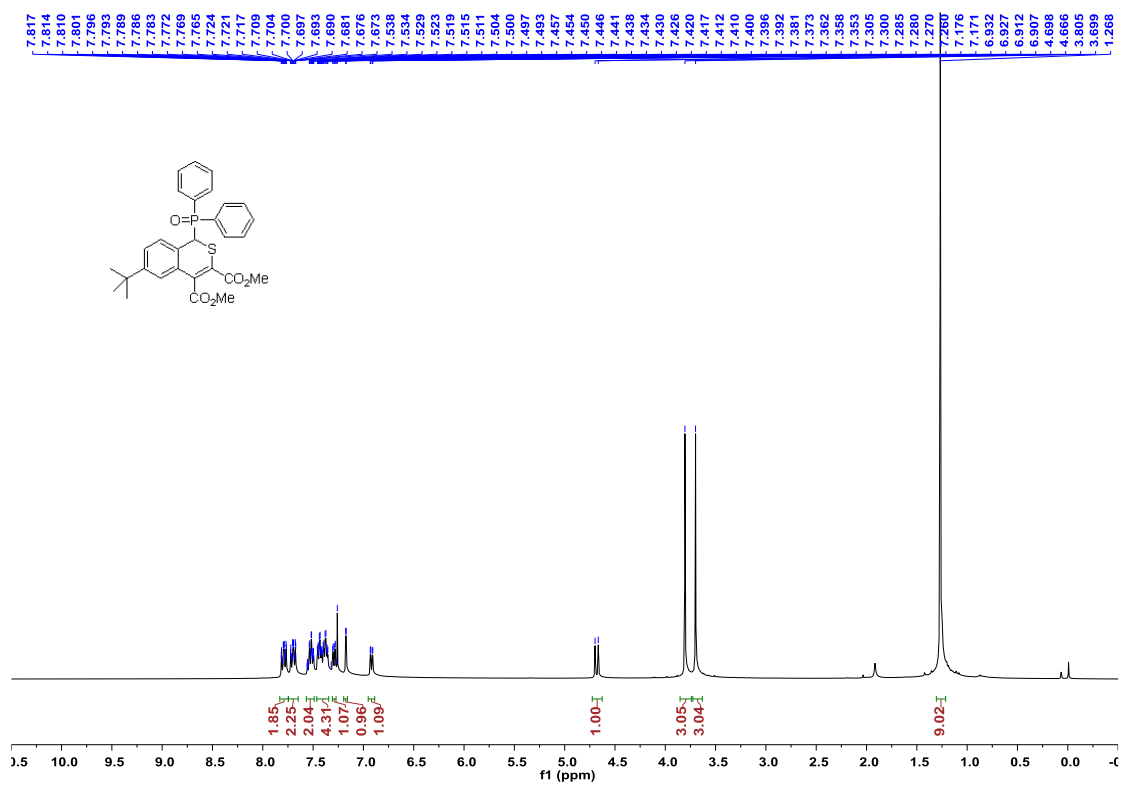

## <sup>31</sup>P NMR (162 MHz, CDCl<sub>3</sub>)

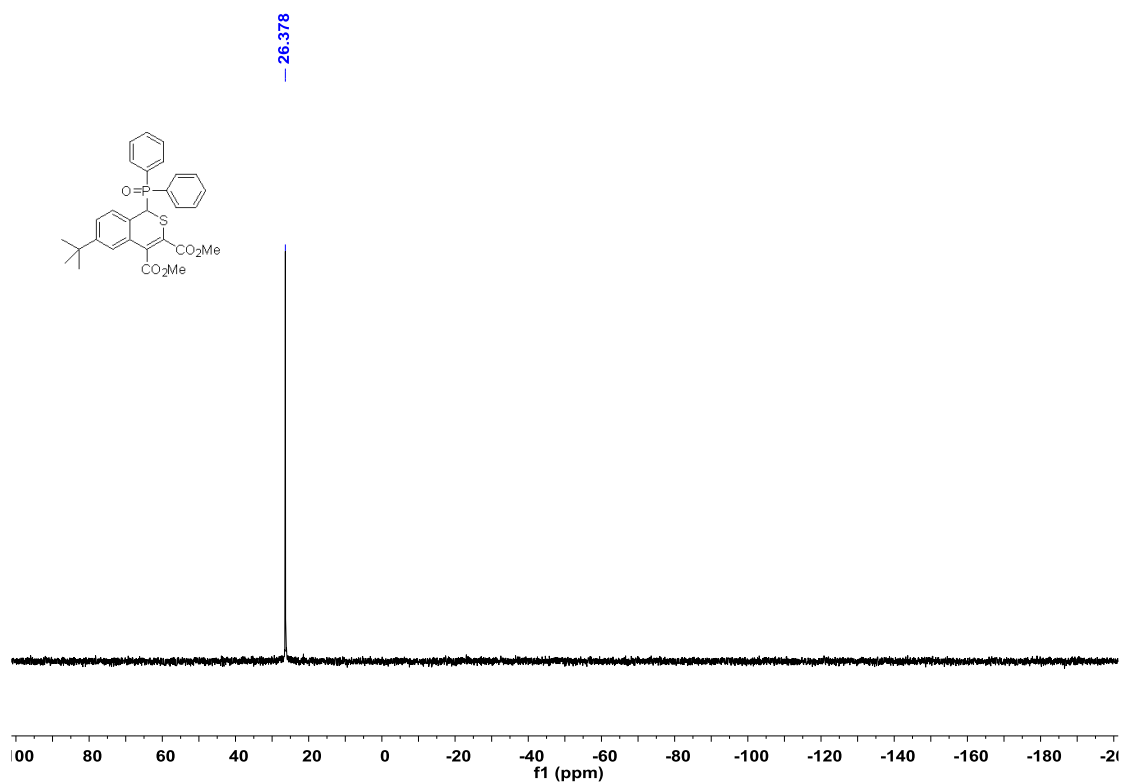

### <sup>13</sup>C NMR (101MHz, CDCl<sub>3</sub>)

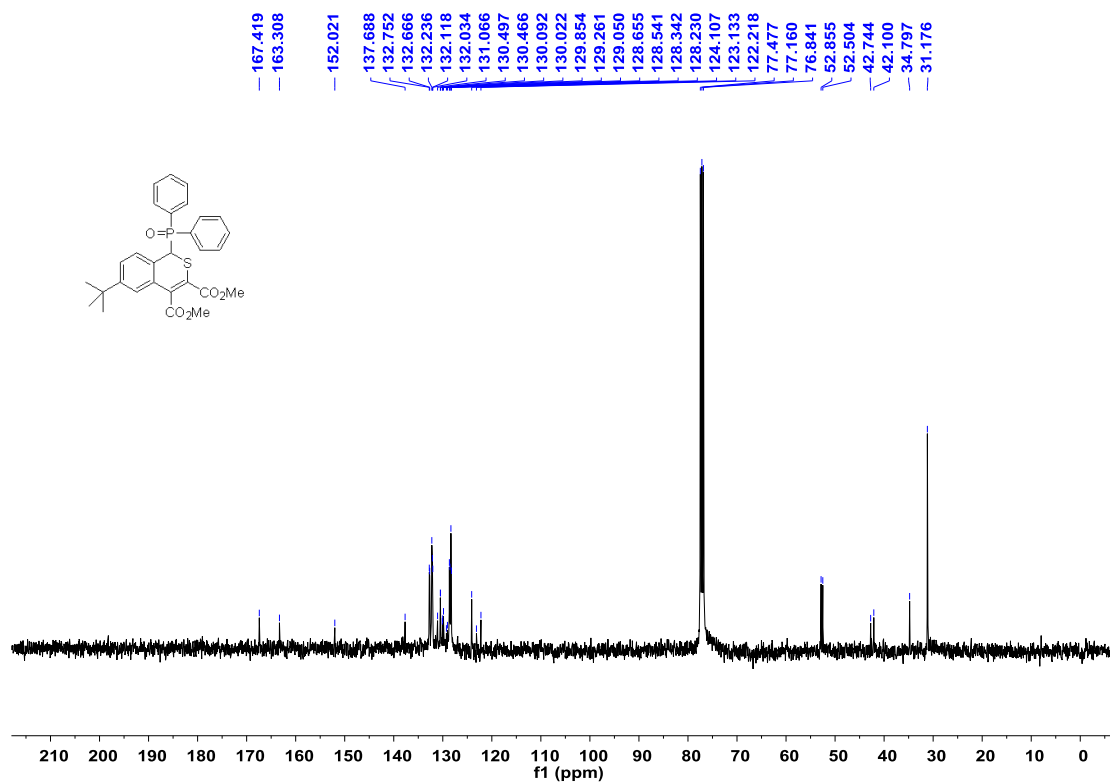

### HRMS

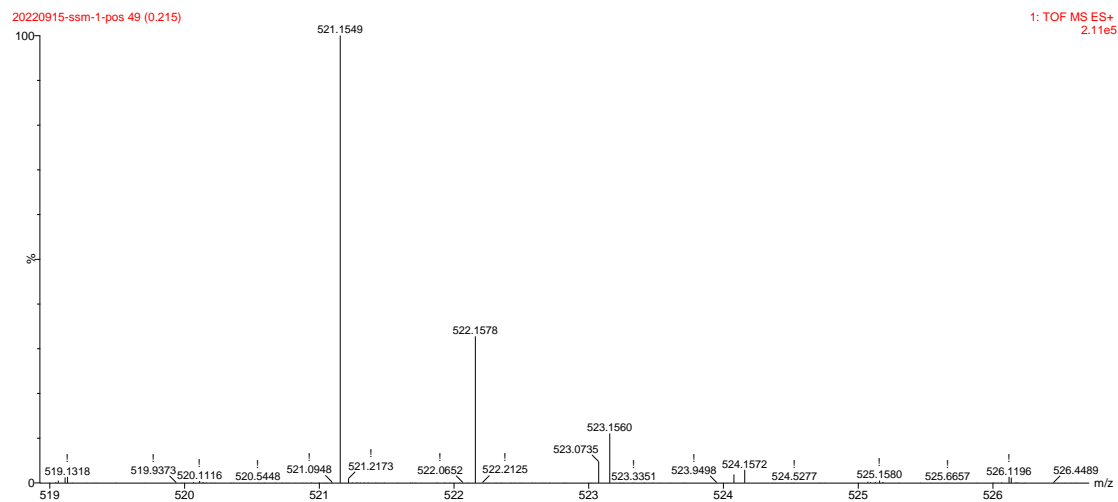

### Dimethyl 1-(diphenylphosphoryl)-6-methoxy-1*H*-isothiochromene-3,4-dicarboxylate (3da)

#### <sup>1</sup>H NMR (400MHz, CDCl<sub>3</sub>)

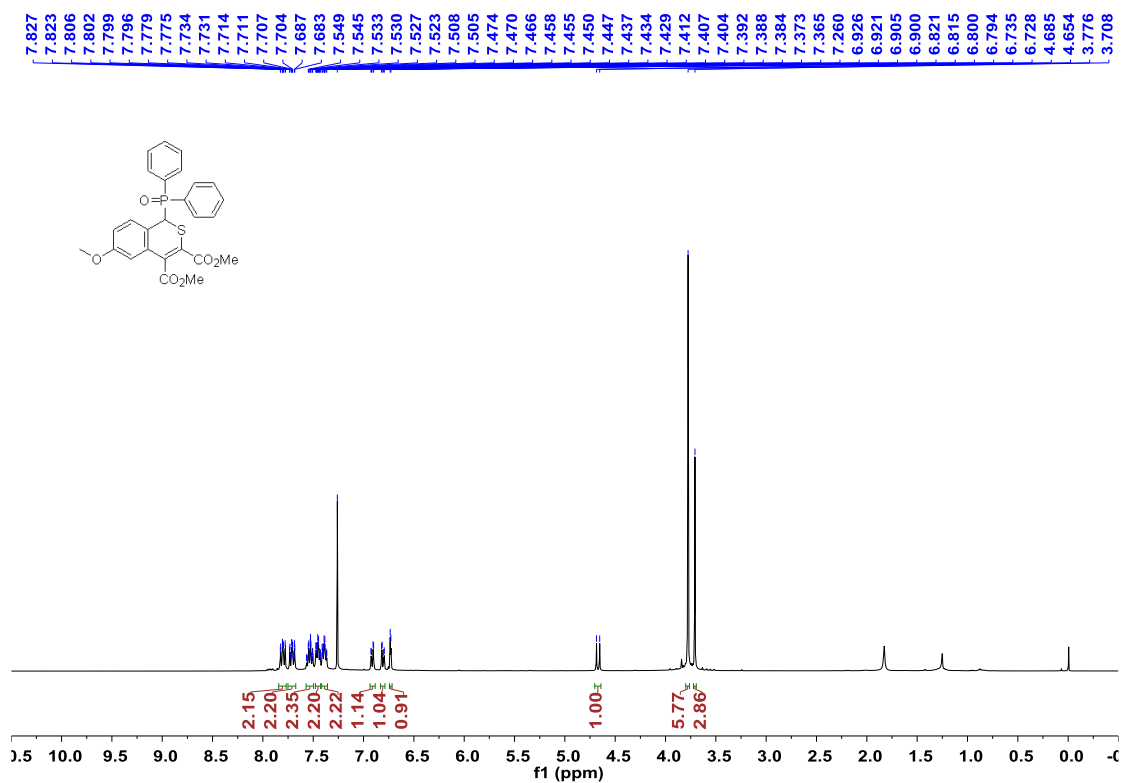

#### <sup>31</sup>P NMR (162 MHz, CDCl<sub>3</sub>)

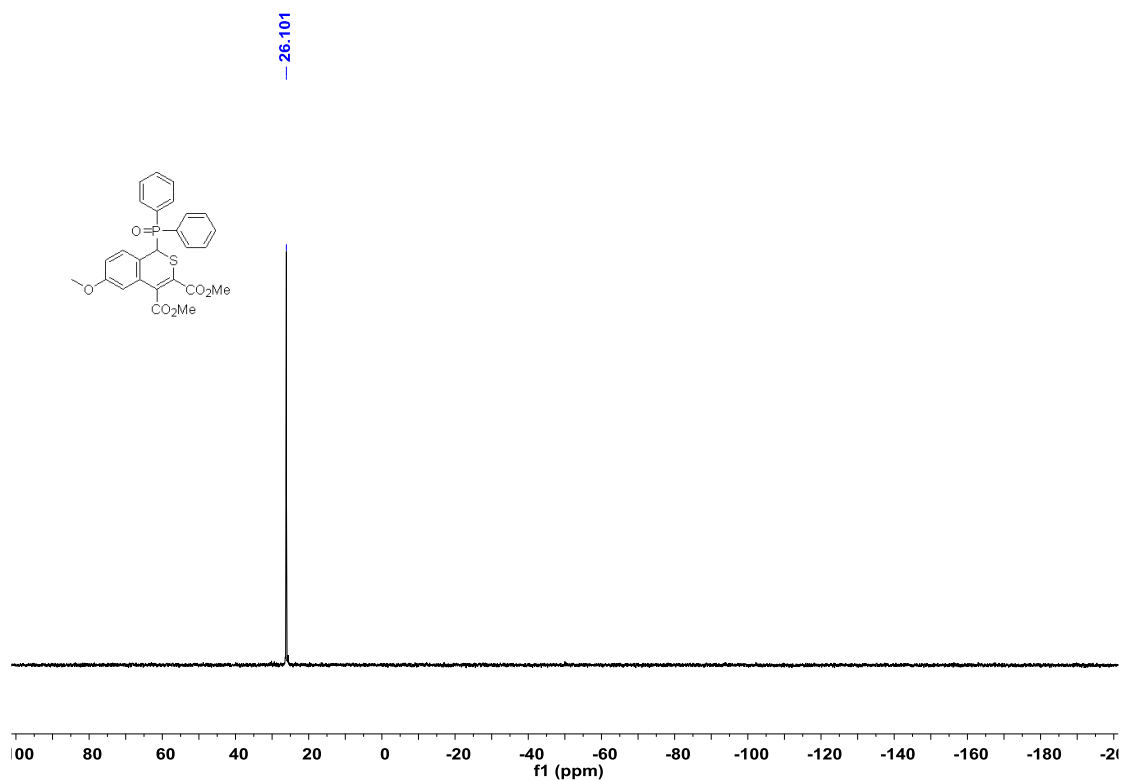

### <sup>13</sup>C NMR (101MHz, CDCl<sub>3</sub>)

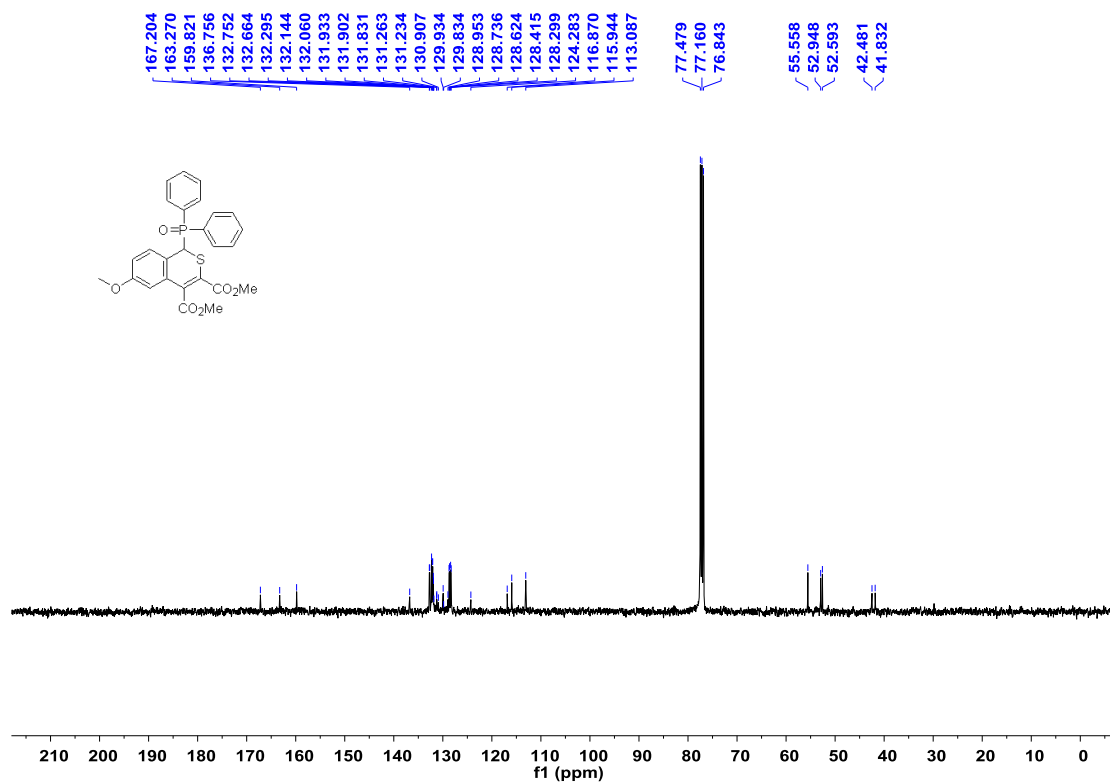

### HRMS

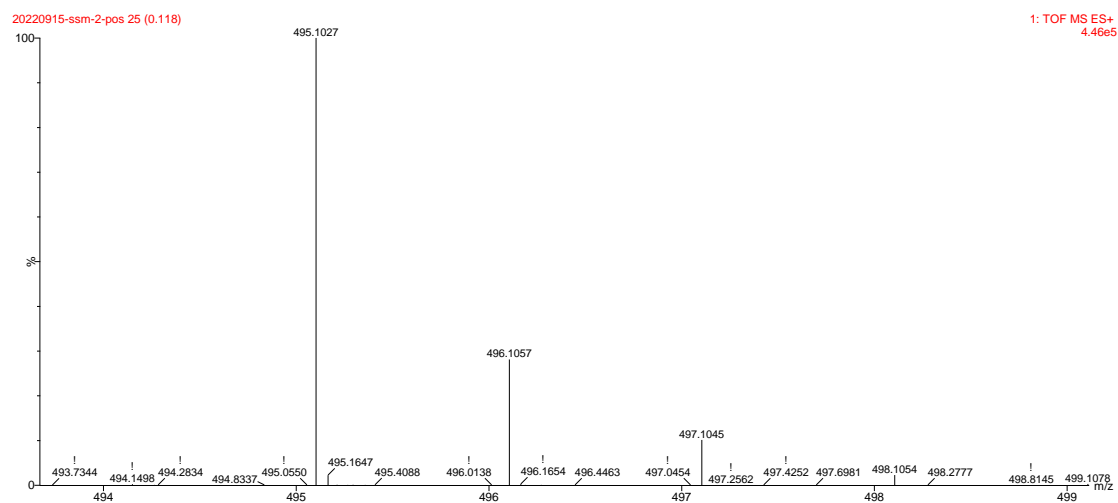



## Dimethyl 6-chloro-1-(diphenylphosphoryl)-1H-isothiochromene-3,4-dicarboxylate (3ea)

### <sup>1</sup>H NMR (400MHz, CDCl<sub>3</sub>)

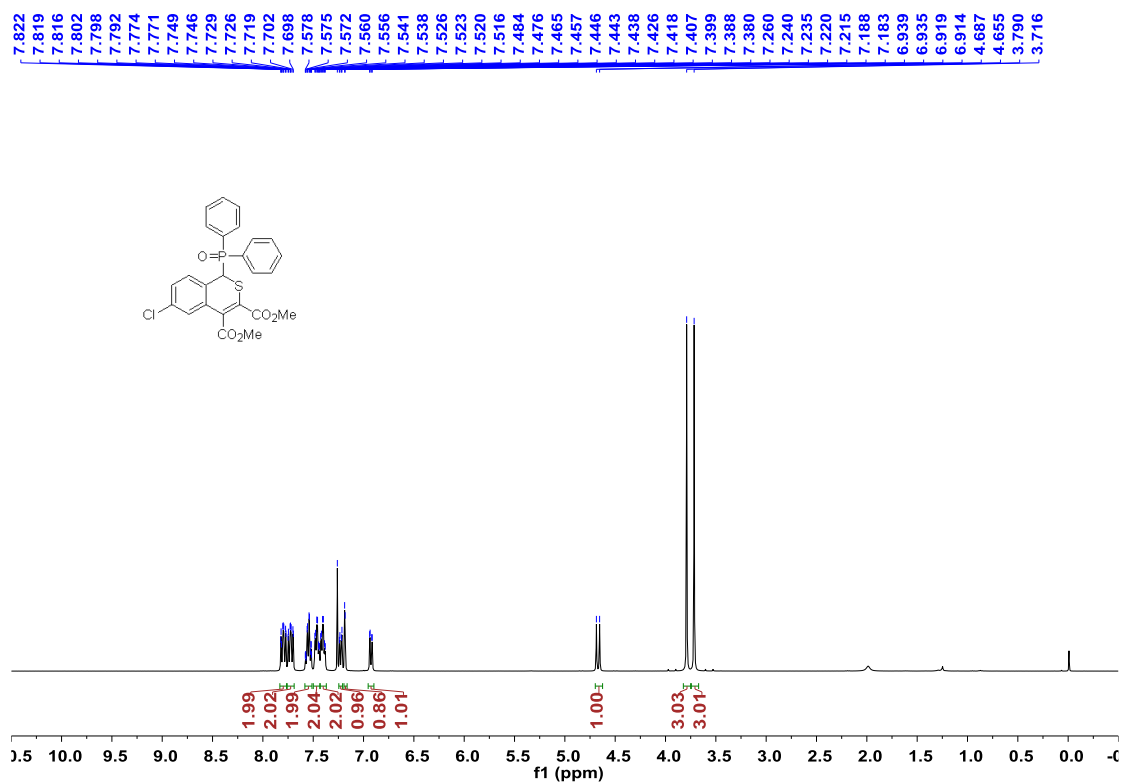

### <sup>31</sup>P NMR (162 MHz, CDCl<sub>3</sub>)

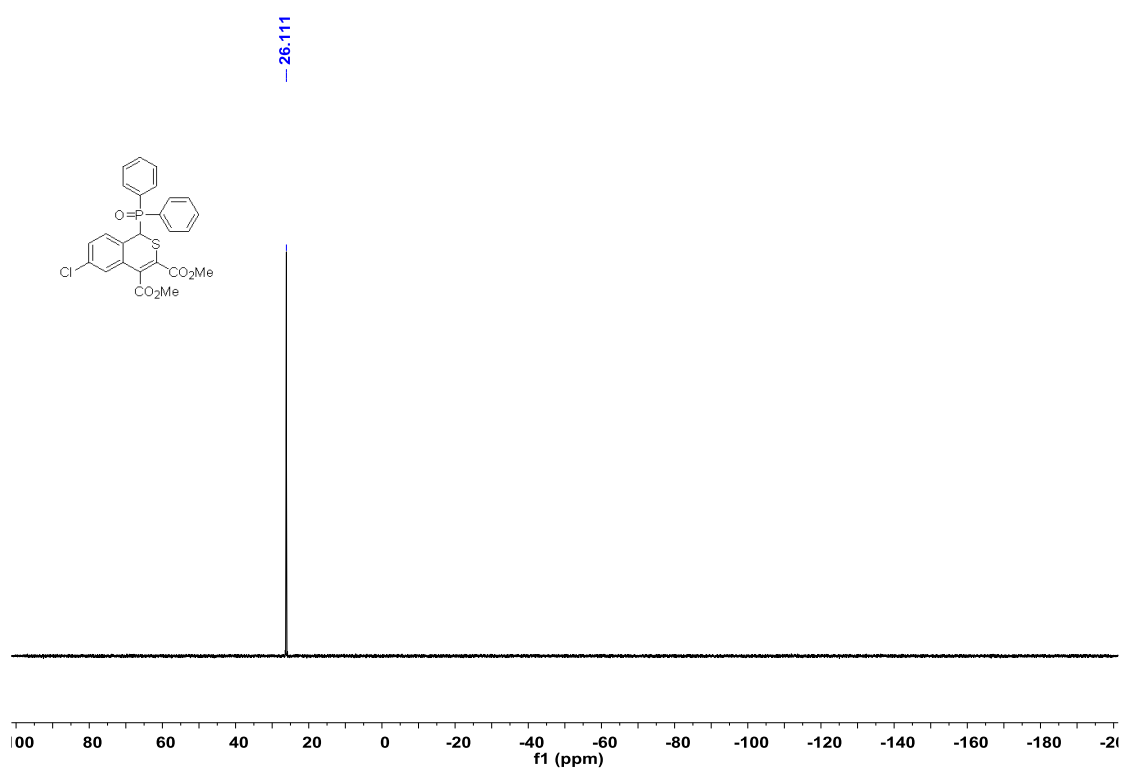

### <sup>13</sup>C NMR (101MHz, CDCl<sub>3</sub>)

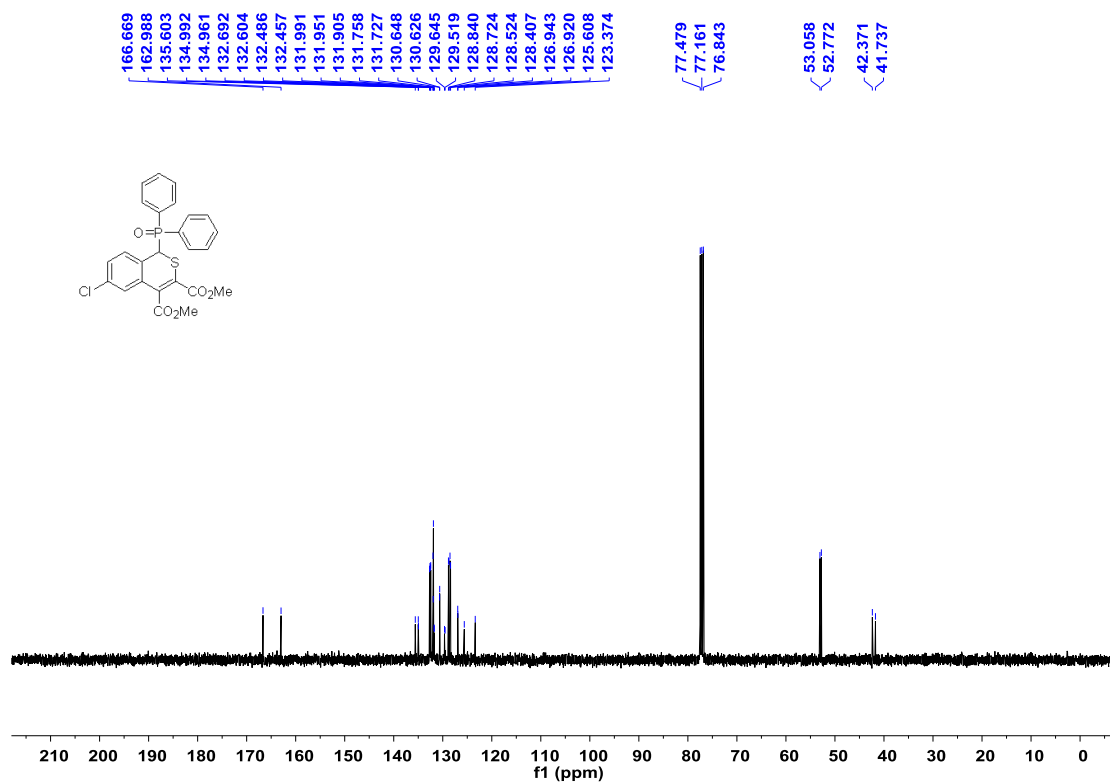

### HRMS

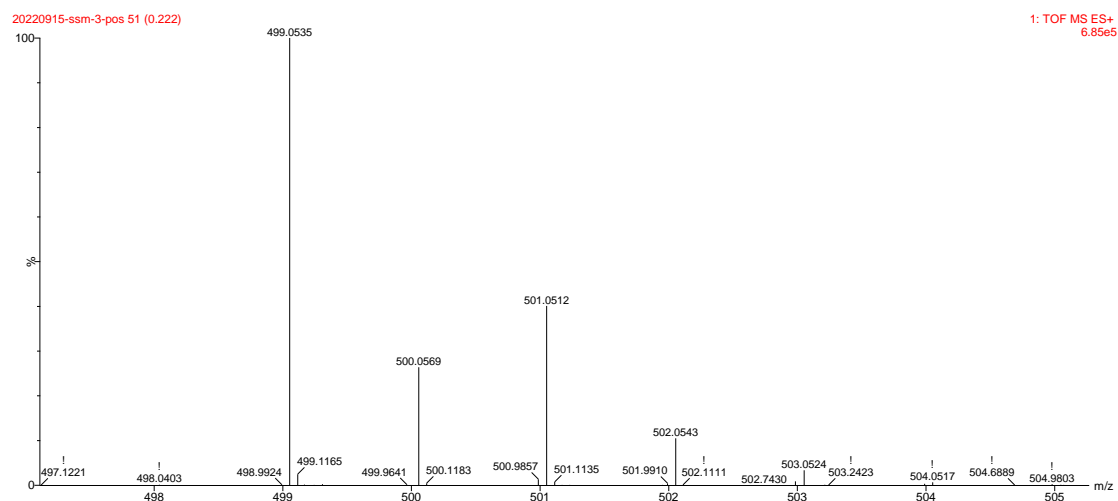

**Dimethyl 1-(diphenylphosphoryl)-6-(trifluoromethyl)-1*H*-isothiochromene-3,4-dicarboxylate (3fa)**

**<sup>1</sup>H NMR (400MHz, CDCl<sub>3</sub>)**

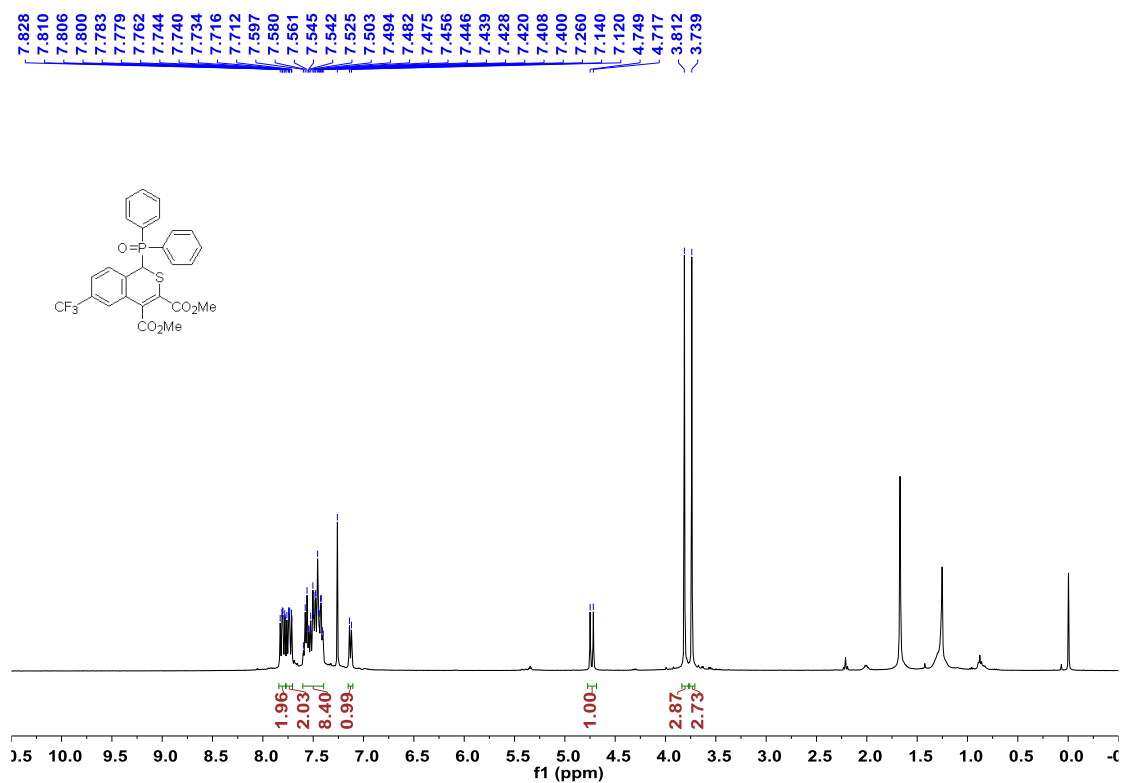

**<sup>31</sup>P NMR (162 MHz, CDCl<sub>3</sub>)**

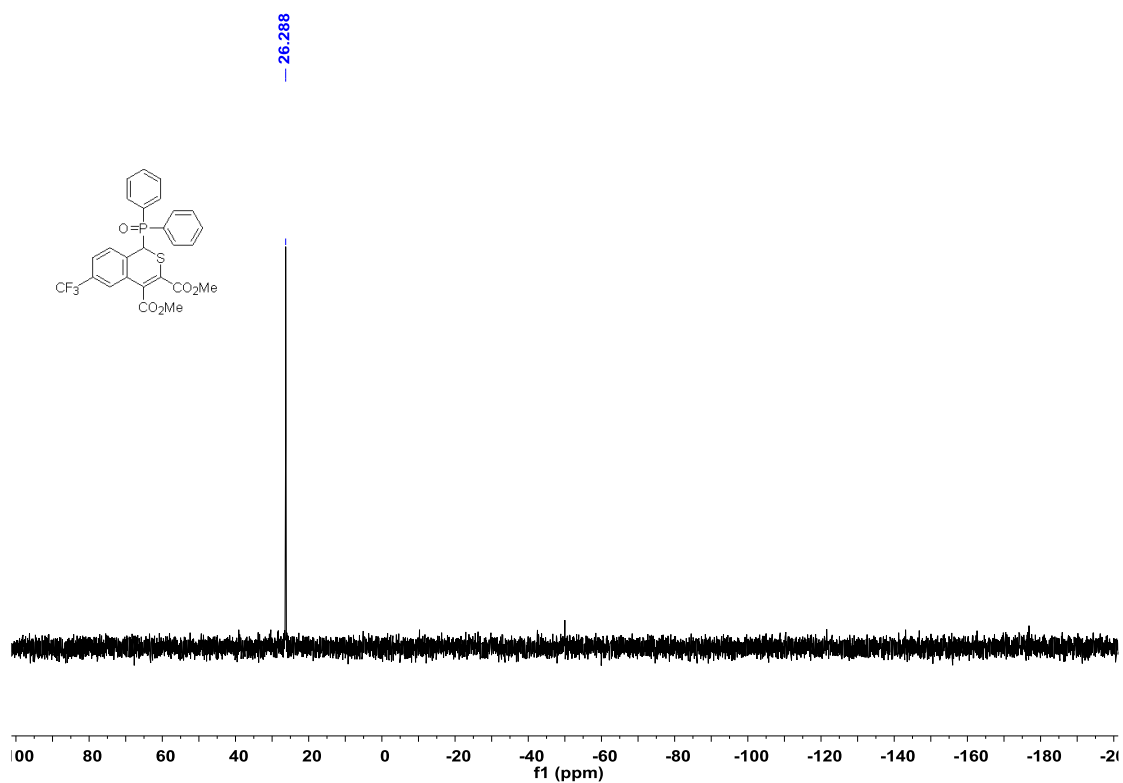

**<sup>13</sup>C NMR (101MHz, CDCl<sub>3</sub>)**

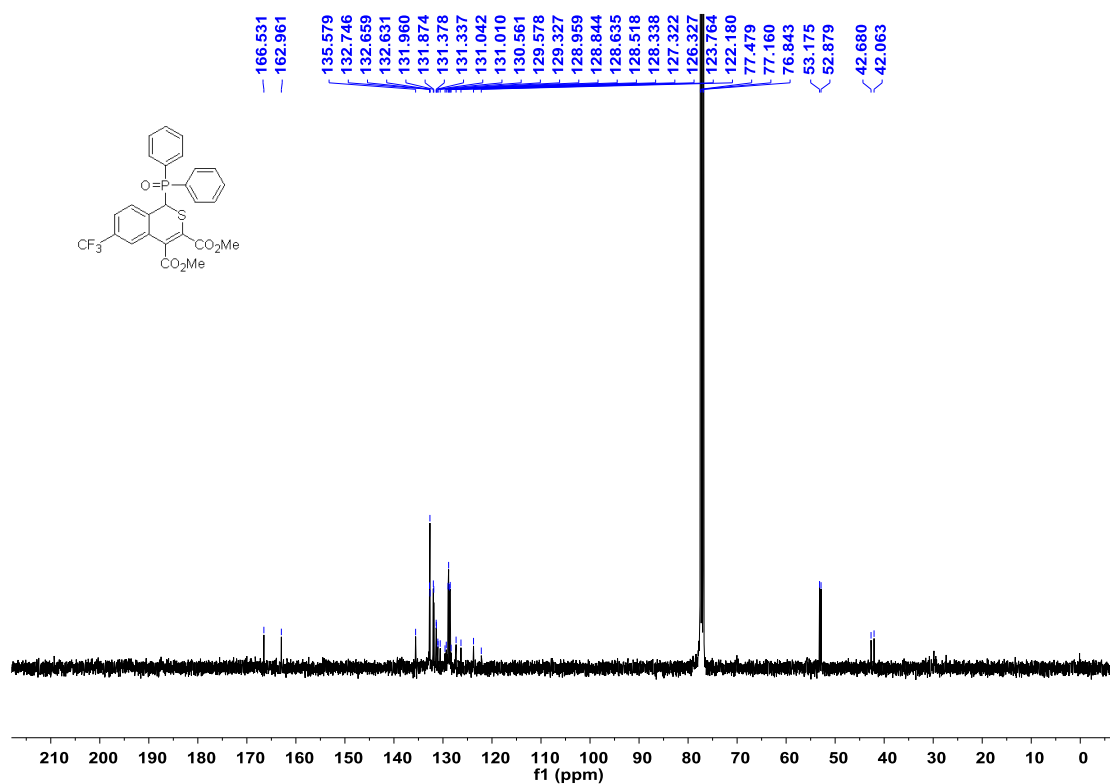

**<sup>19</sup>F NMR (376MHz, CDCl<sub>3</sub>)**

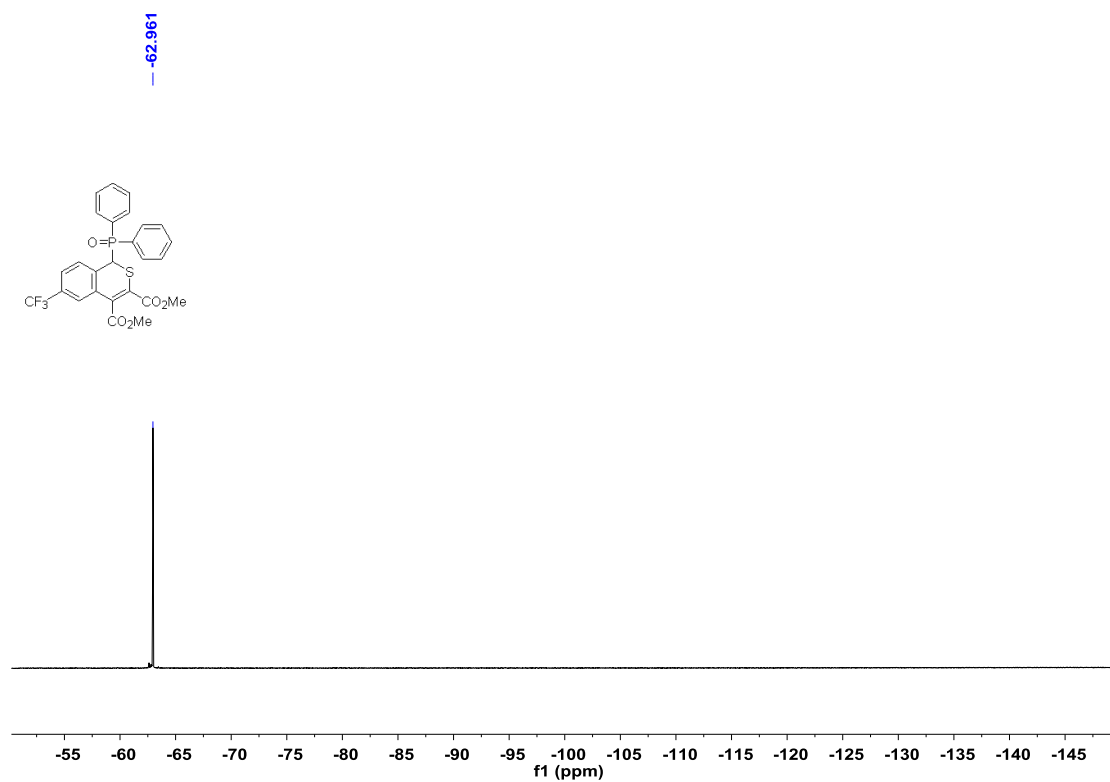

# HRMS

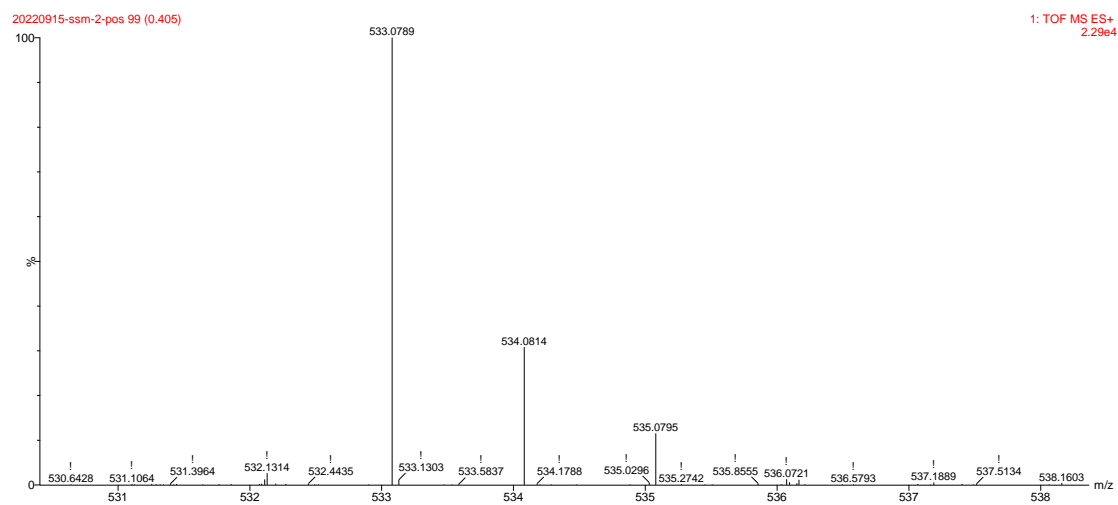

### Dimethyl 1-(di-*p*-tolylphosphoryl)-1*H*-isothiochromene-3,4-dicarboxylate (3ha)

#### <sup>1</sup>H NMR (400MHz, CDCl<sub>3</sub>)

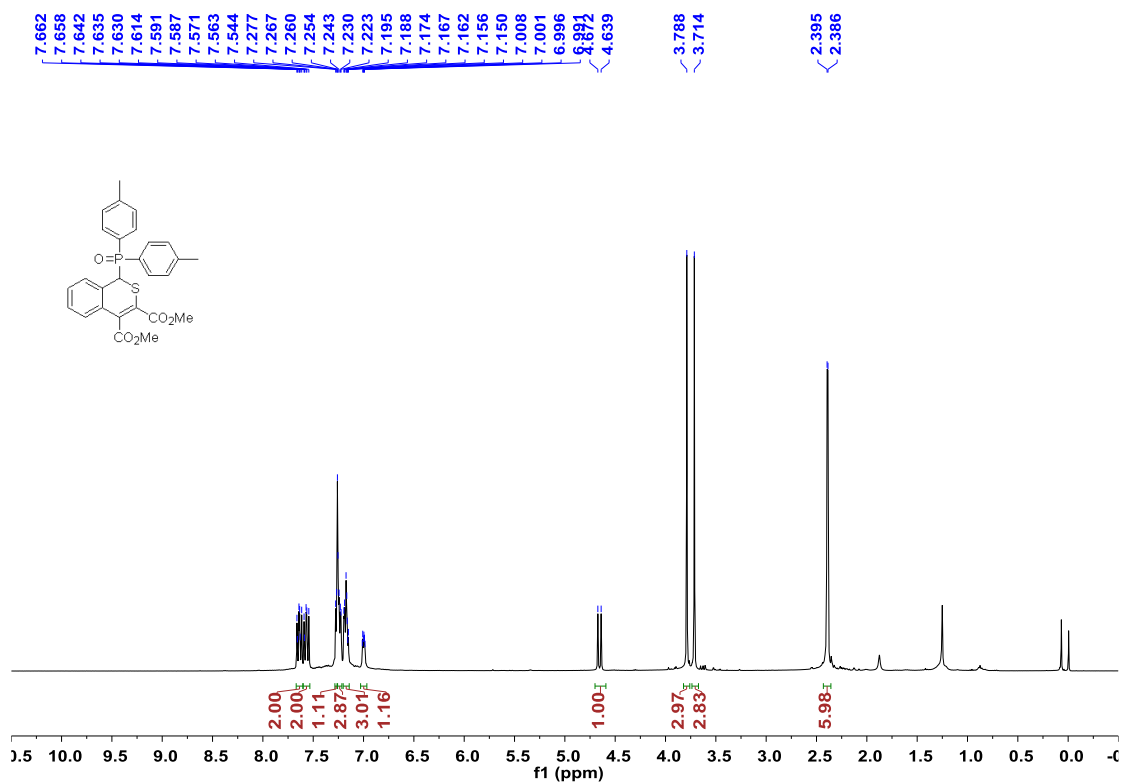

#### <sup>31</sup>P NMR (162 MHz, CDCl<sub>3</sub>)

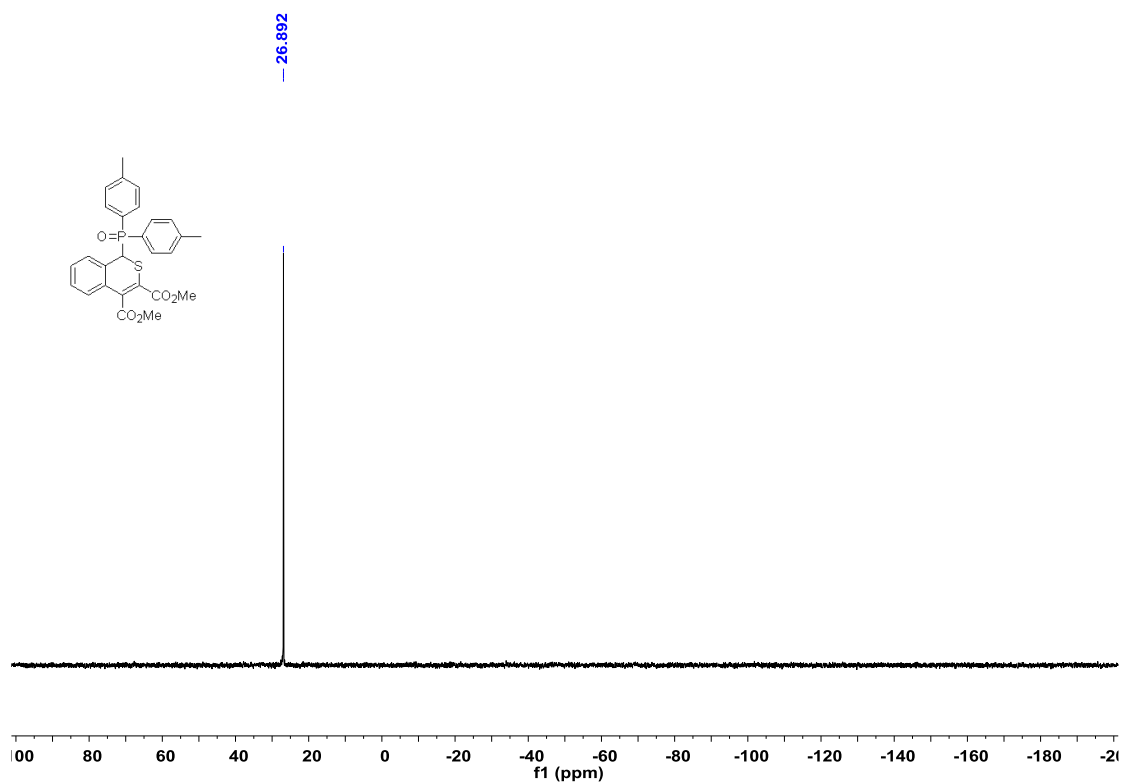

### <sup>13</sup>C NMR (101MHz, CDCl<sub>3</sub>)

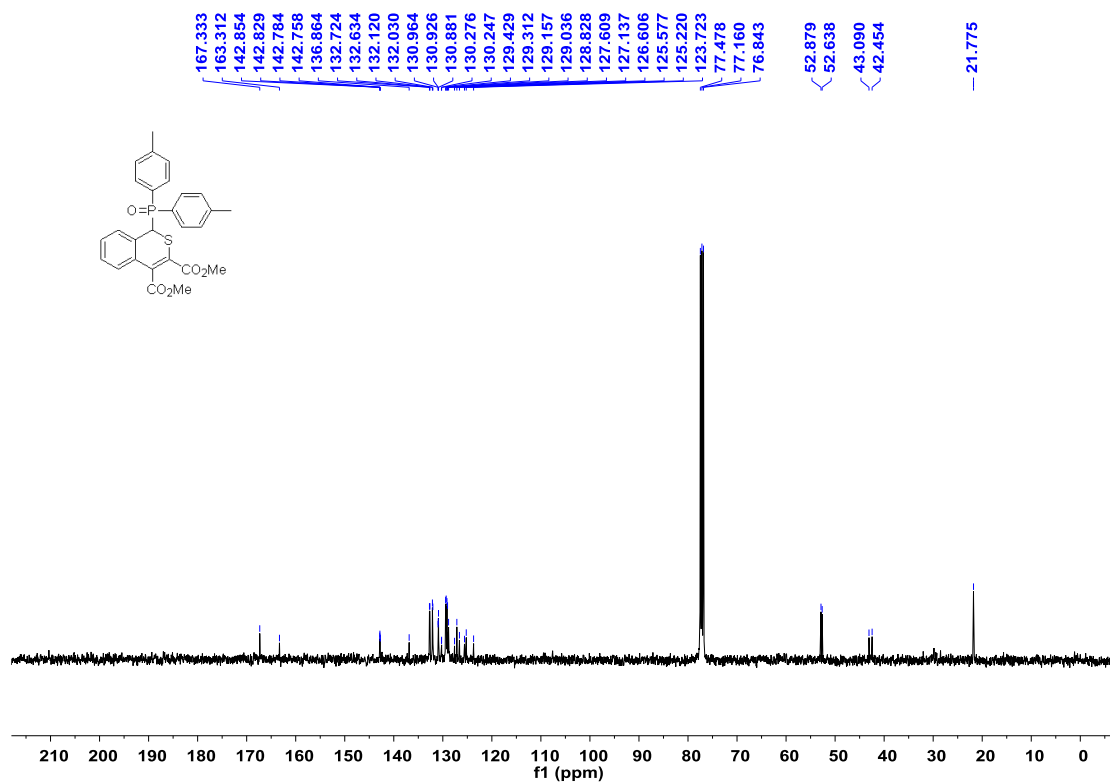

### HRMS

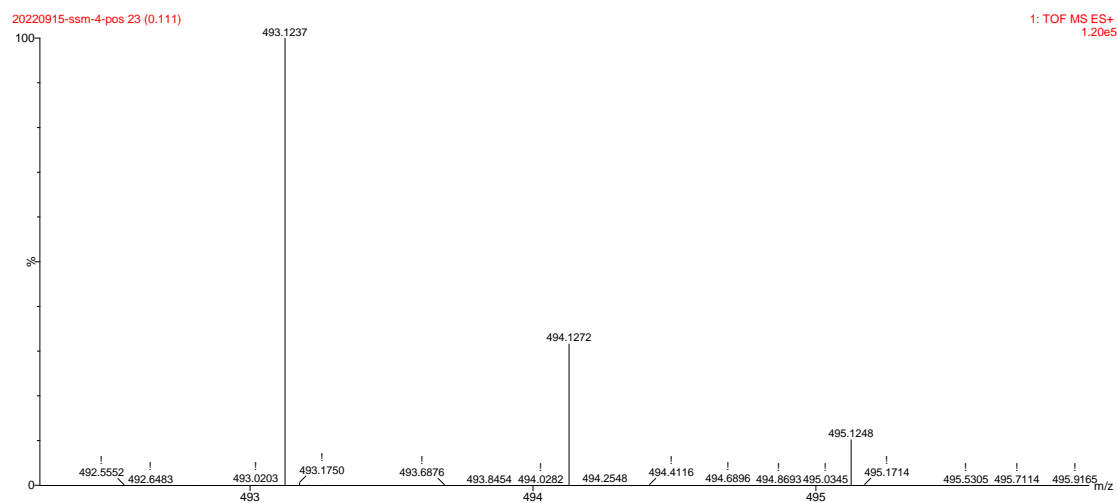

# Dimethyl 1-(bis(4-chlorophenyl)phosphoryl)-1*H*-isothiochromene-3,4-dicarboxylate (3ia)

## <sup>1</sup>H NMR (400MHz, CDCl<sub>3</sub>)

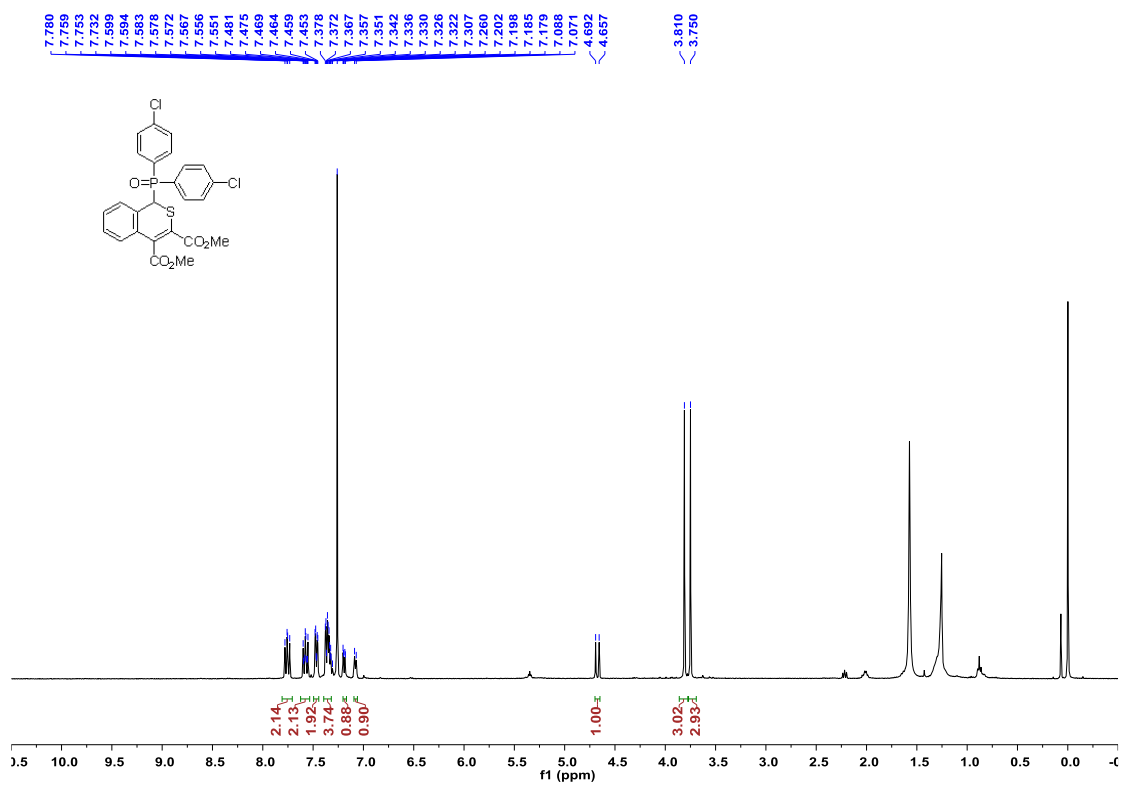

## <sup>31</sup>P NMR (162 MHz, CDCl<sub>3</sub>)

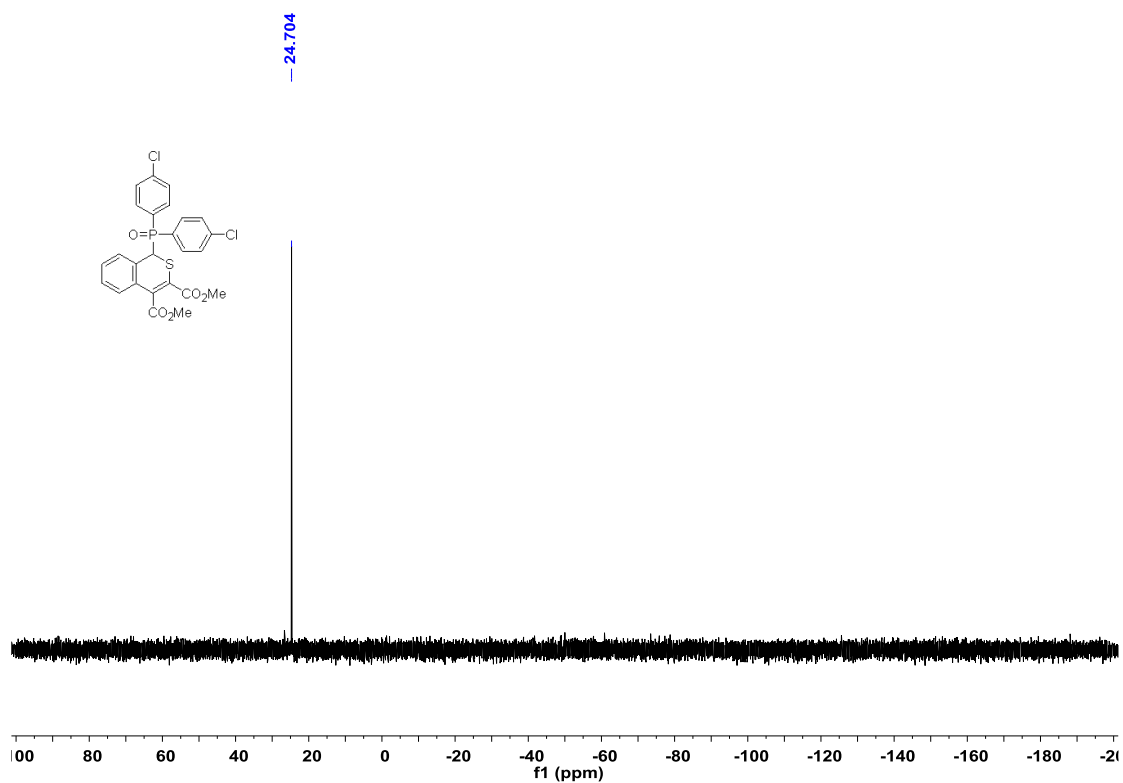



### <sup>13</sup>C NMR (101MHz, CDCl<sub>3</sub>)

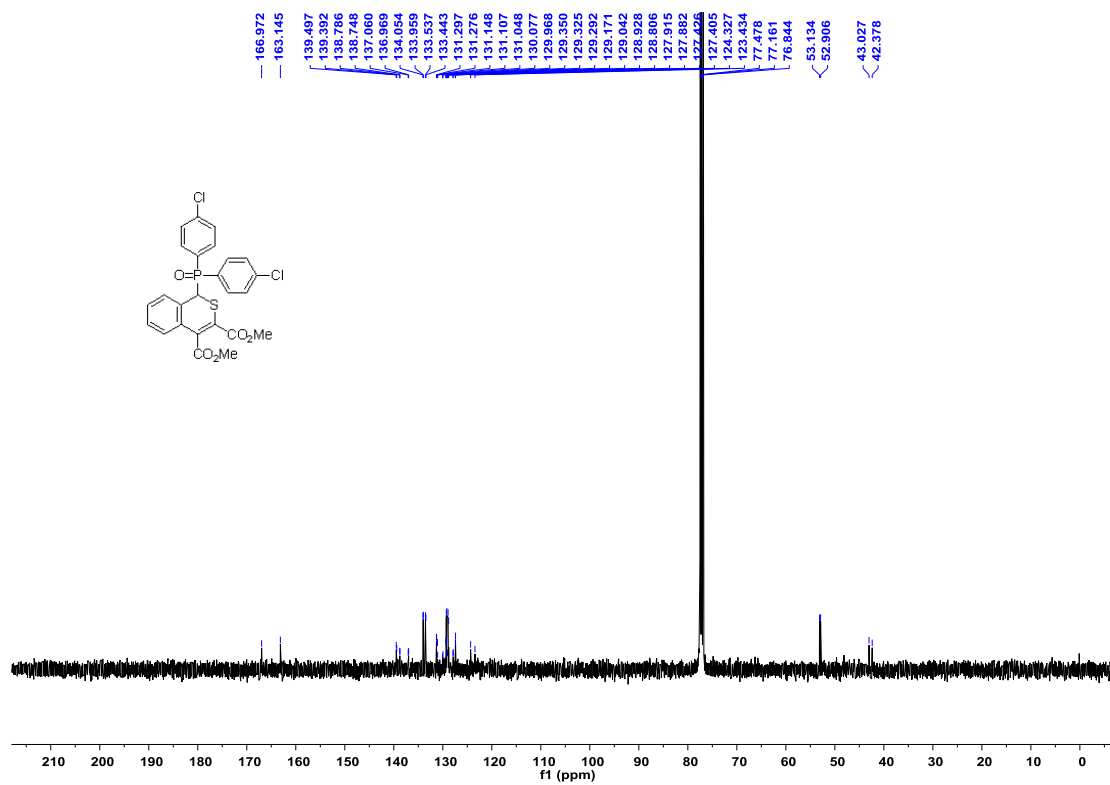

### HRMS

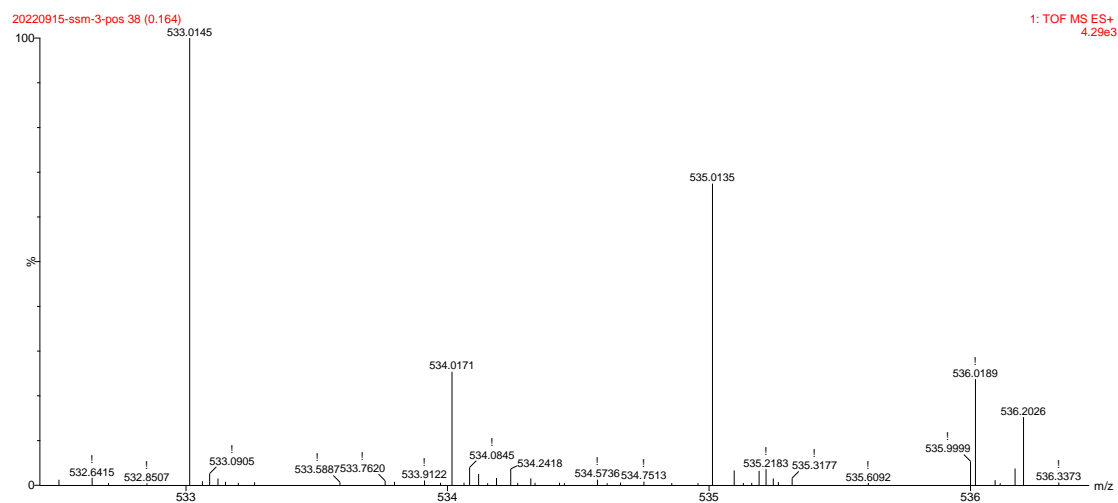

# Diethyl 1-(diphenylphosphoryl)-1*H*-isothiochromene-3,4-dicarboxylate (3ab)

## <sup>1</sup>H NMR (400MHz, CDCl<sub>3</sub>)

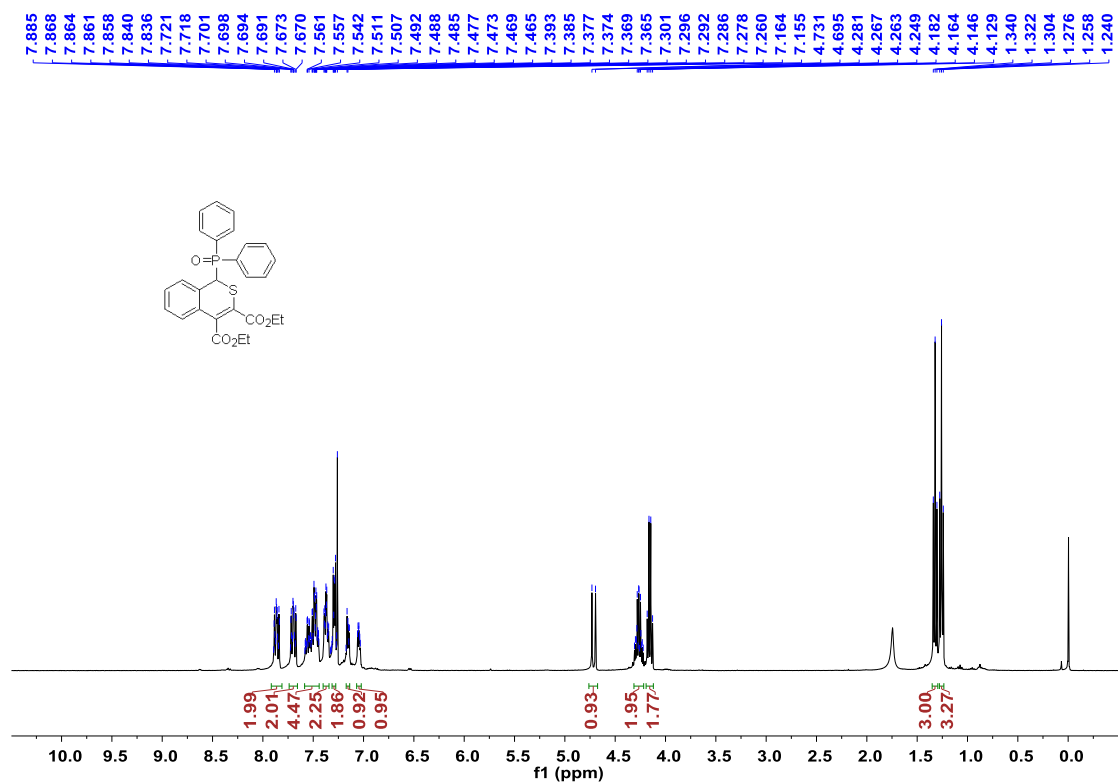

## <sup>31</sup>P NMR (162 MHz, CDCl<sub>3</sub>)

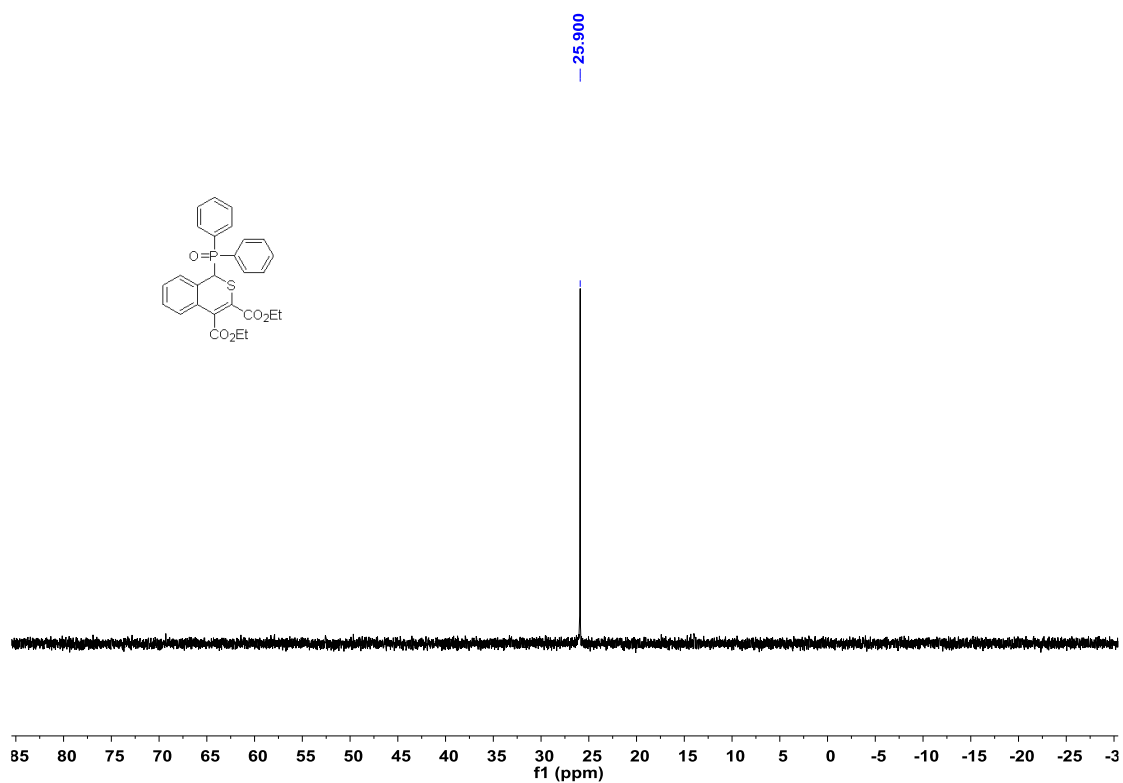

**<sup>13</sup>C NMR (101MHz, CDCl<sub>3</sub>)**

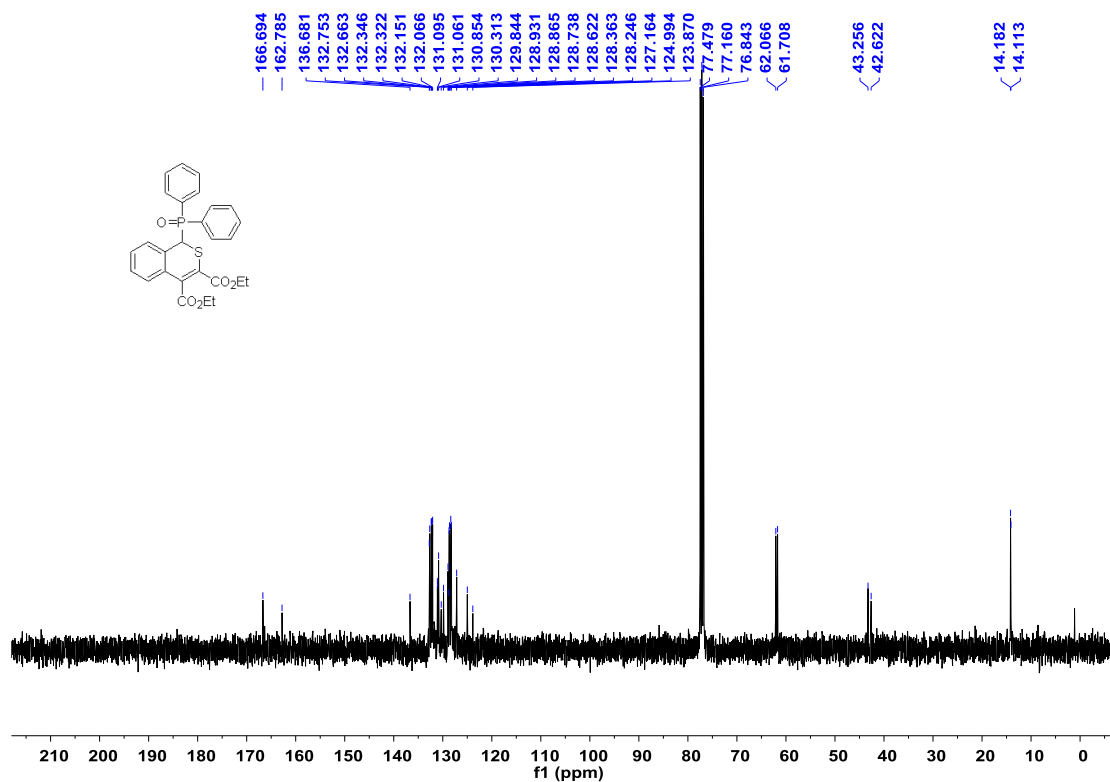

**HRMS**

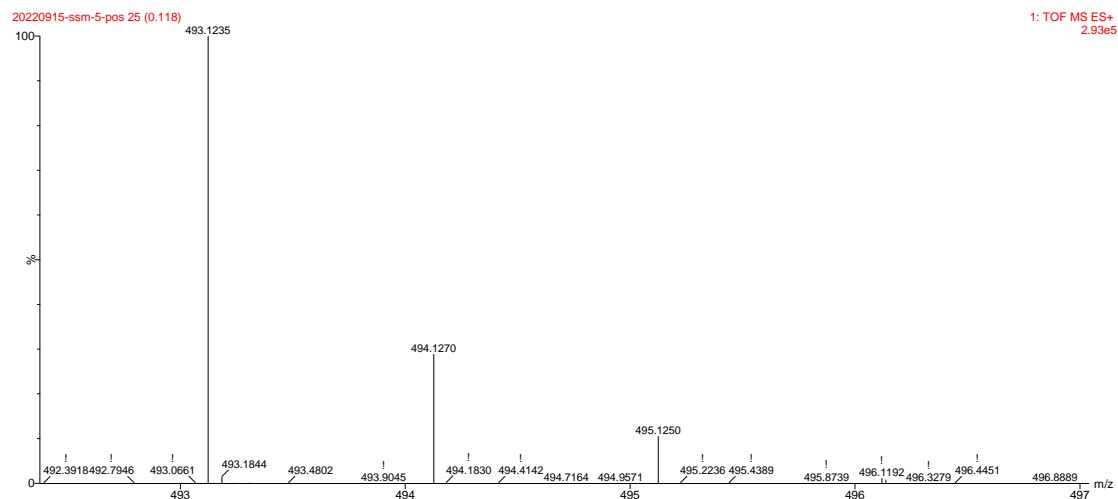

**Di(pentan-3-yl) 1-(diphenylphosphoryl)-1*H*-isothiochromene-3,4-dicarboxylate (3ac)**

**<sup>1</sup>H NMR (400MHz, CDCl<sub>3</sub>)**

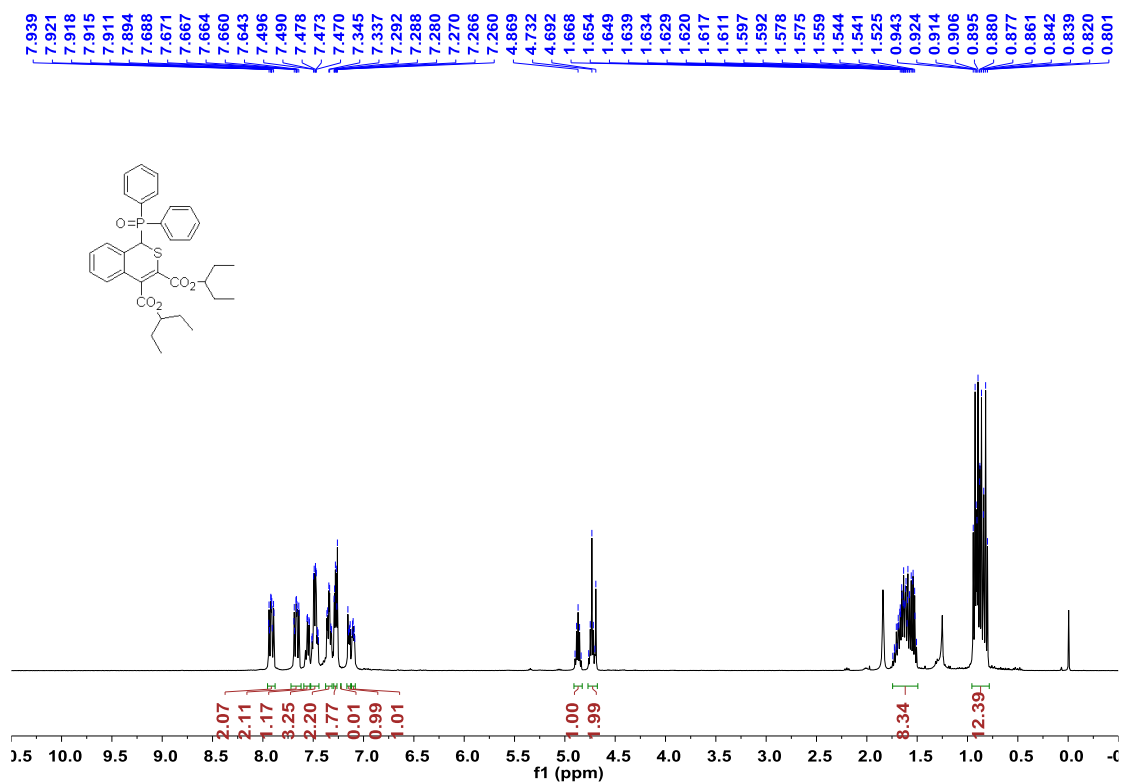

**<sup>31</sup>P NMR (162 MHz, CDCl<sub>3</sub>)**

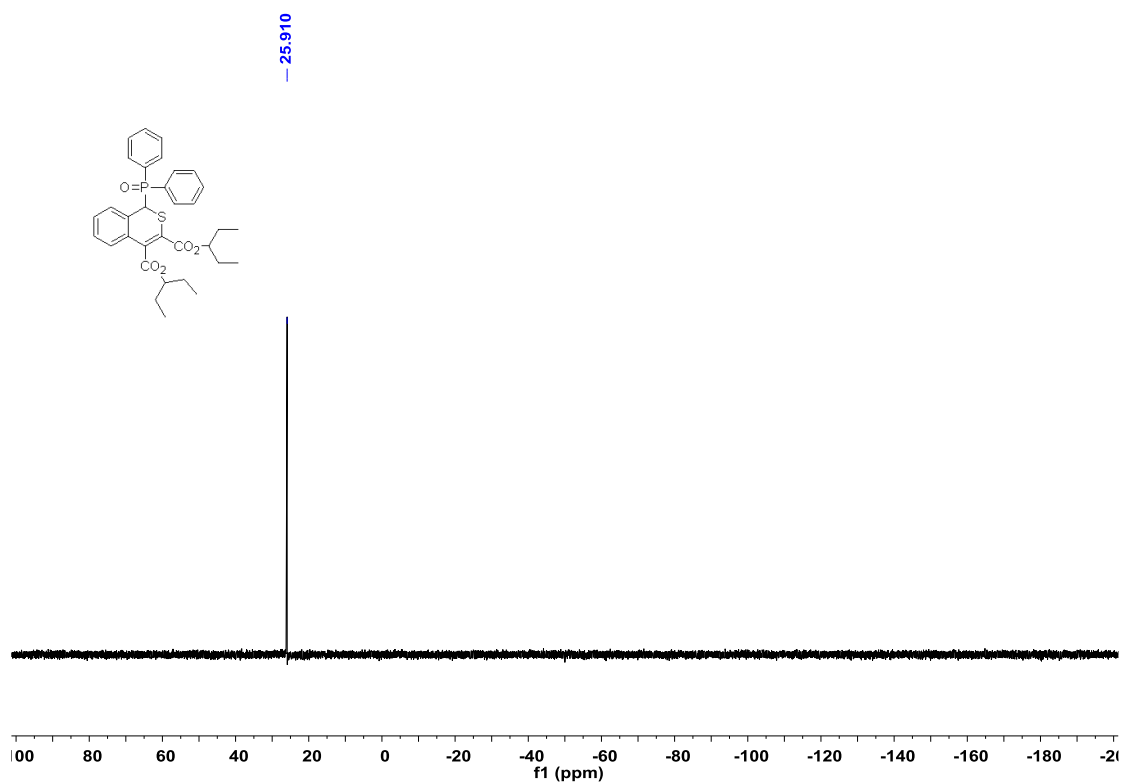

### <sup>13</sup>C NMR (101MHz, CDCl<sub>3</sub>)

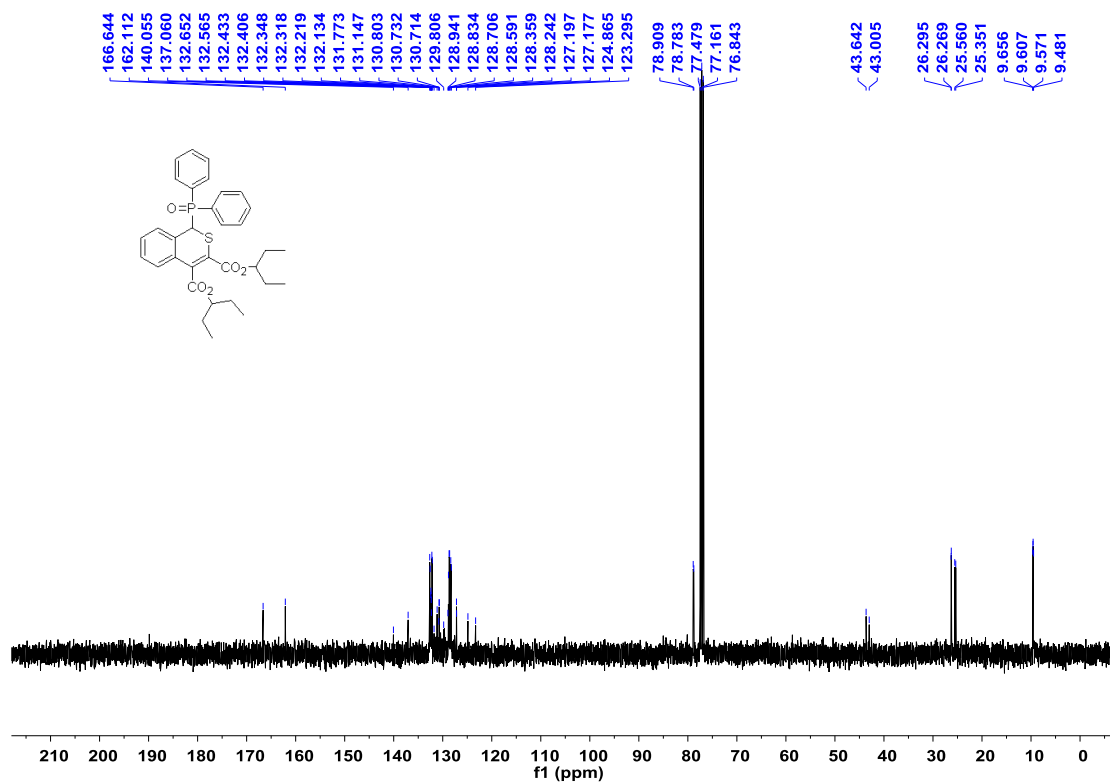

### HRMS

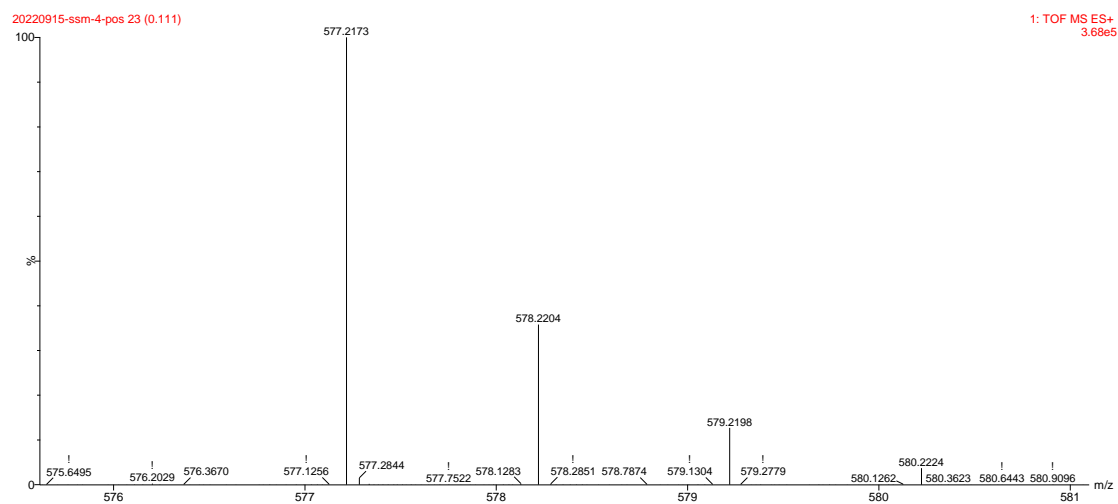

# Di-*tert*-butyl 1-(diphenylphosphoryl)-1*H*-isothiochromene-3,4-dicarboxylate (3ad)

## <sup>1</sup>H NMR (400MHz, CDCl<sub>3</sub>)

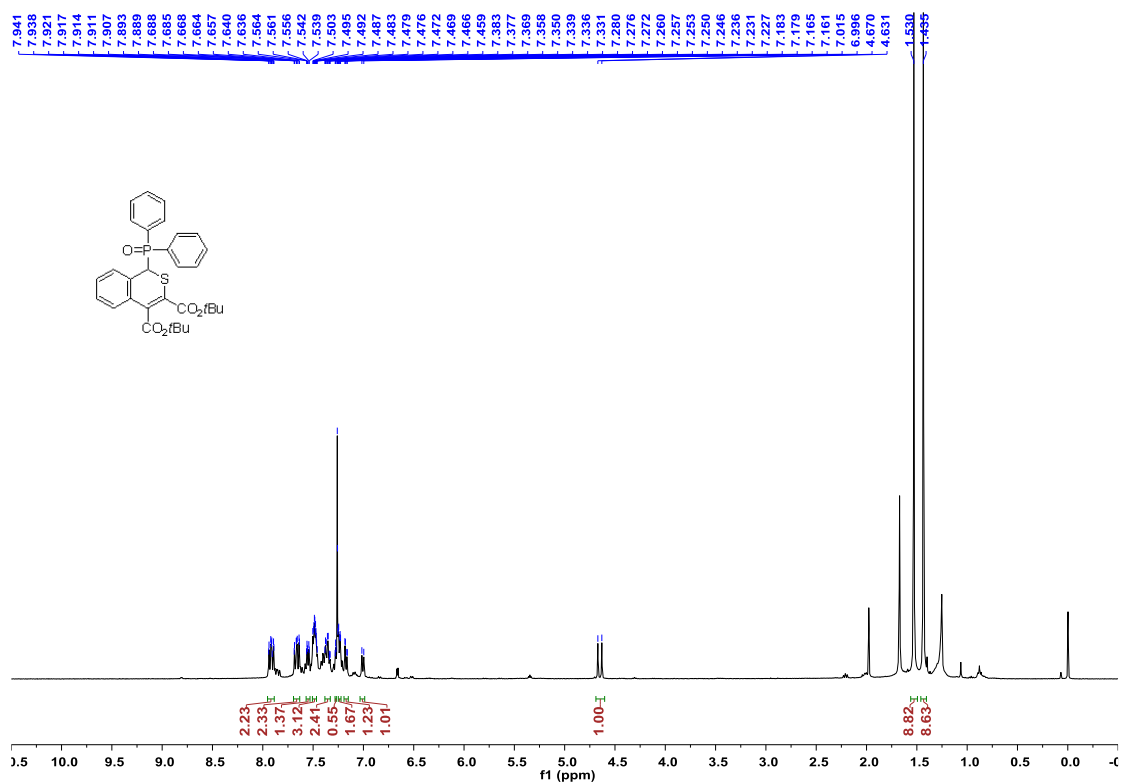

## <sup>31</sup>P NMR (162 MHz, CDCl<sub>3</sub>)

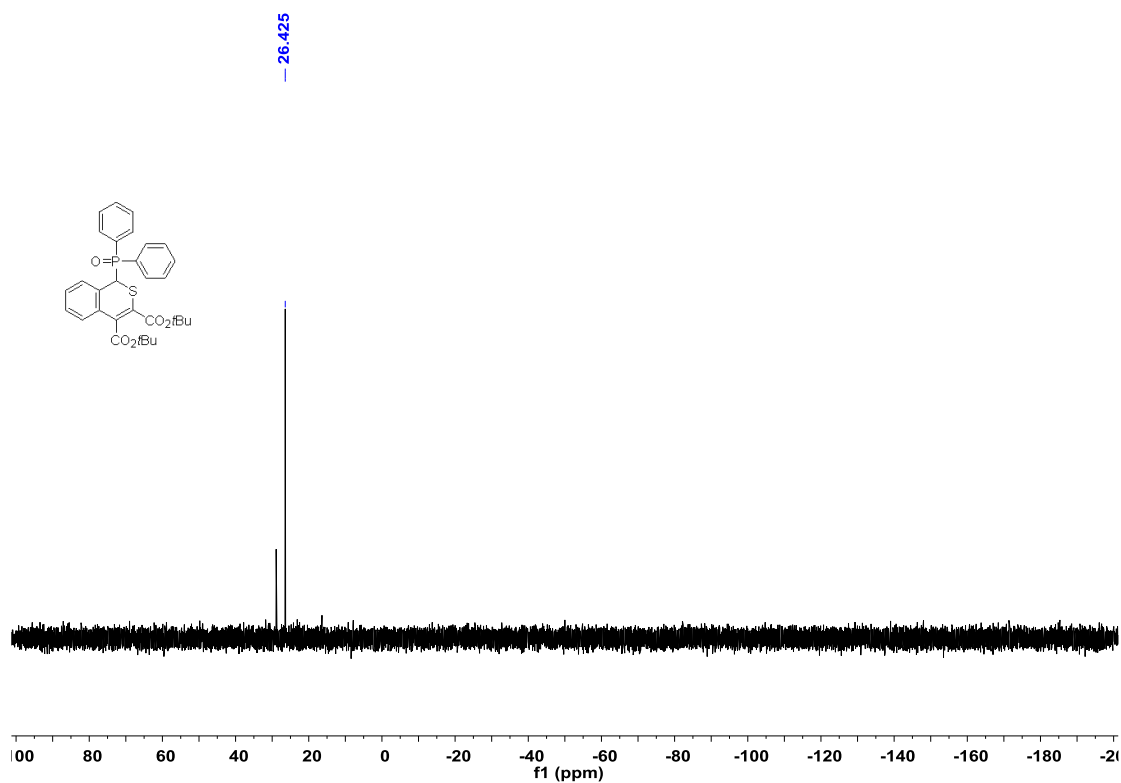

### <sup>13</sup>C NMR (101MHz, CDCl<sub>3</sub>)

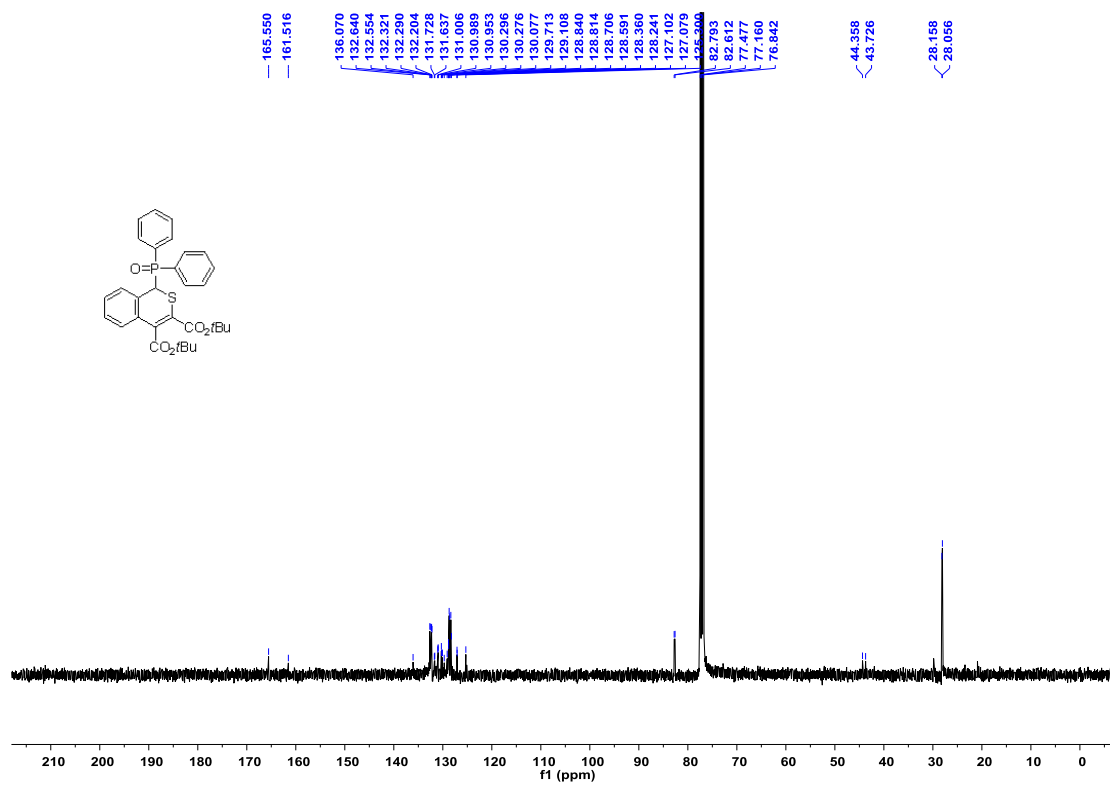

### HRMS

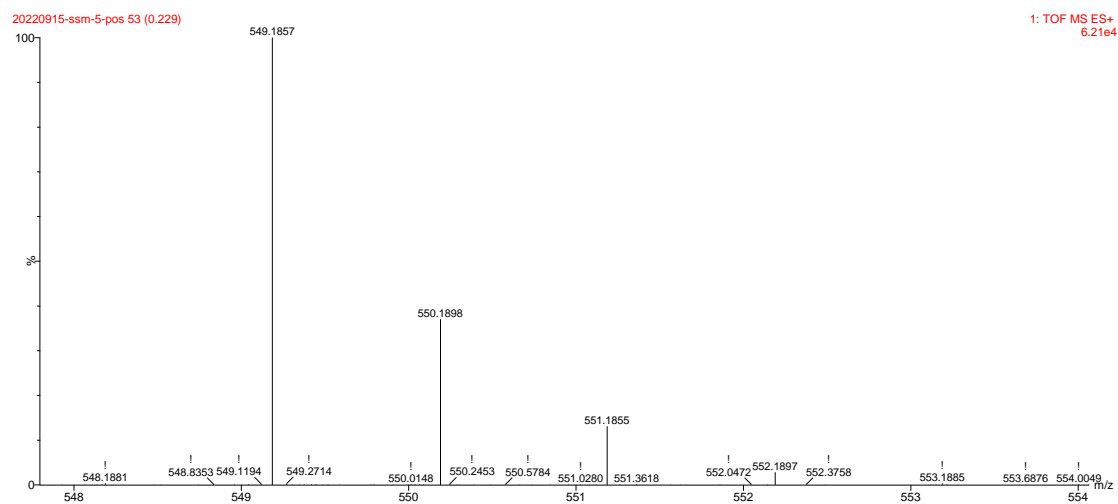

### Methyl 3-benzoyl-1-(diphenylphosphoryl)-1H-isothiochromene-4-carboxylate (3ae)

<sup>1</sup>H NMR (400MHz, CDCl<sub>3</sub>)

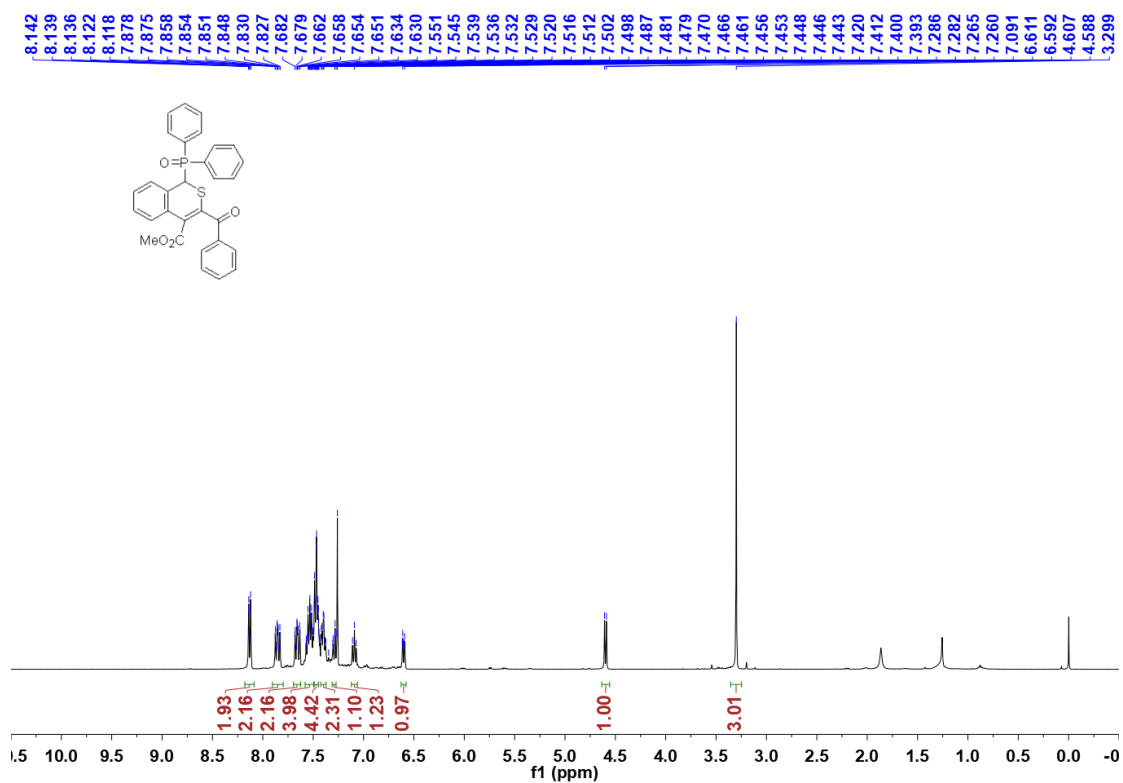

<sup>31</sup>P NMR (162 MHz, CDCl<sub>3</sub>)

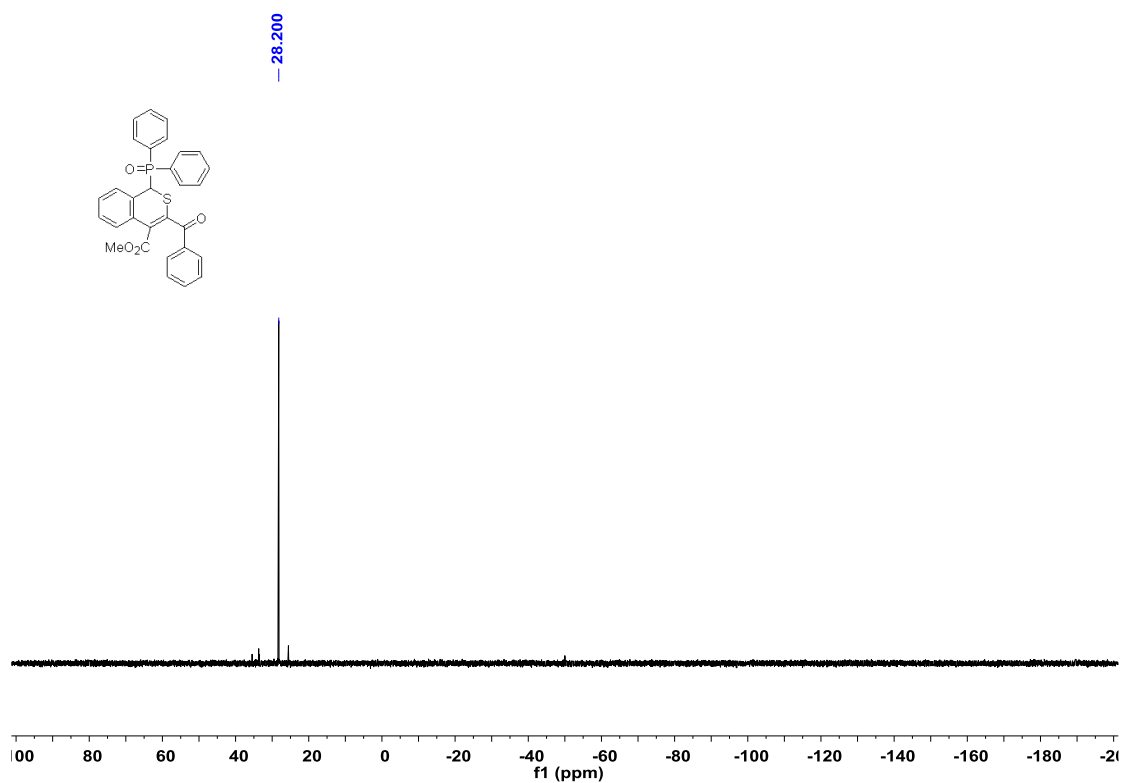



### <sup>13</sup>C NMR (101MHz, CDCl<sub>3</sub>)

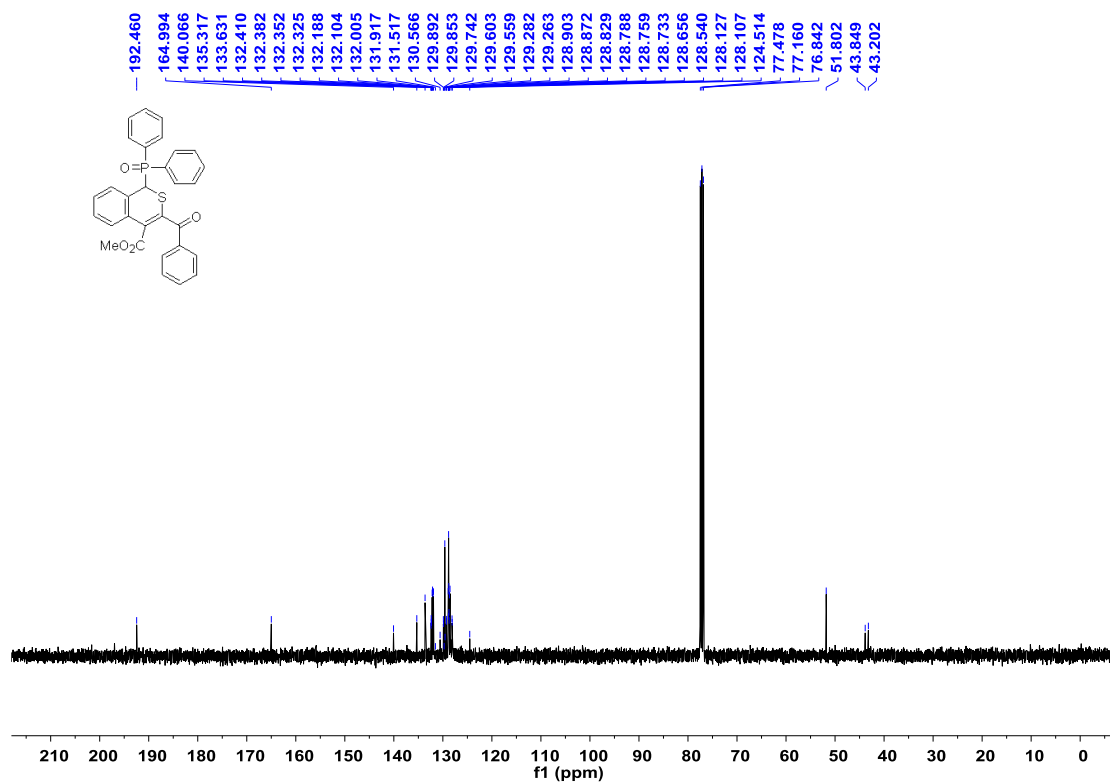

### HRMS

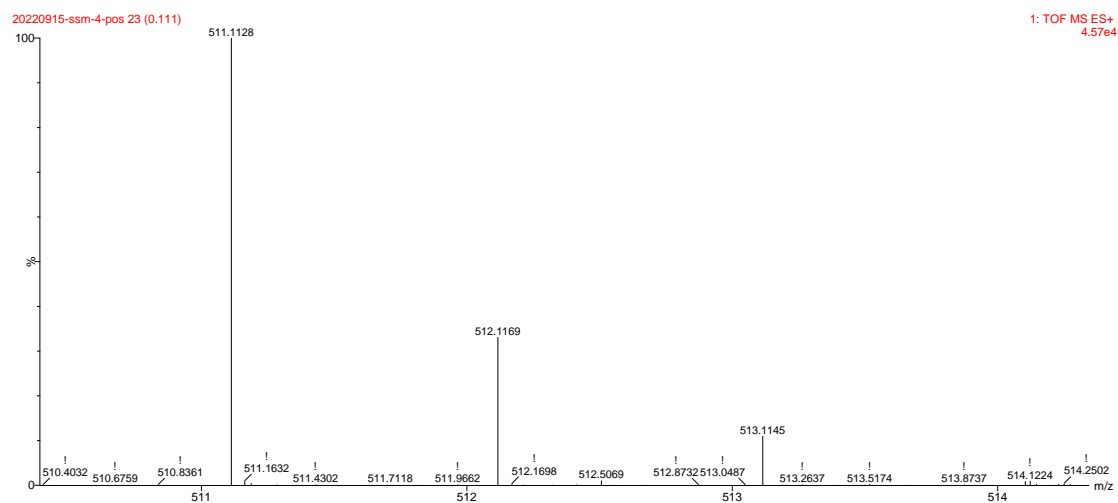

# Methyl 1-(diphenylphosphoryl)-3-(furan-2-carbonyl)-1*H*-isothiochromene-4-carboxylate (3af)

## <sup>1</sup>H NMR (400MHz, CDCl<sub>3</sub>)

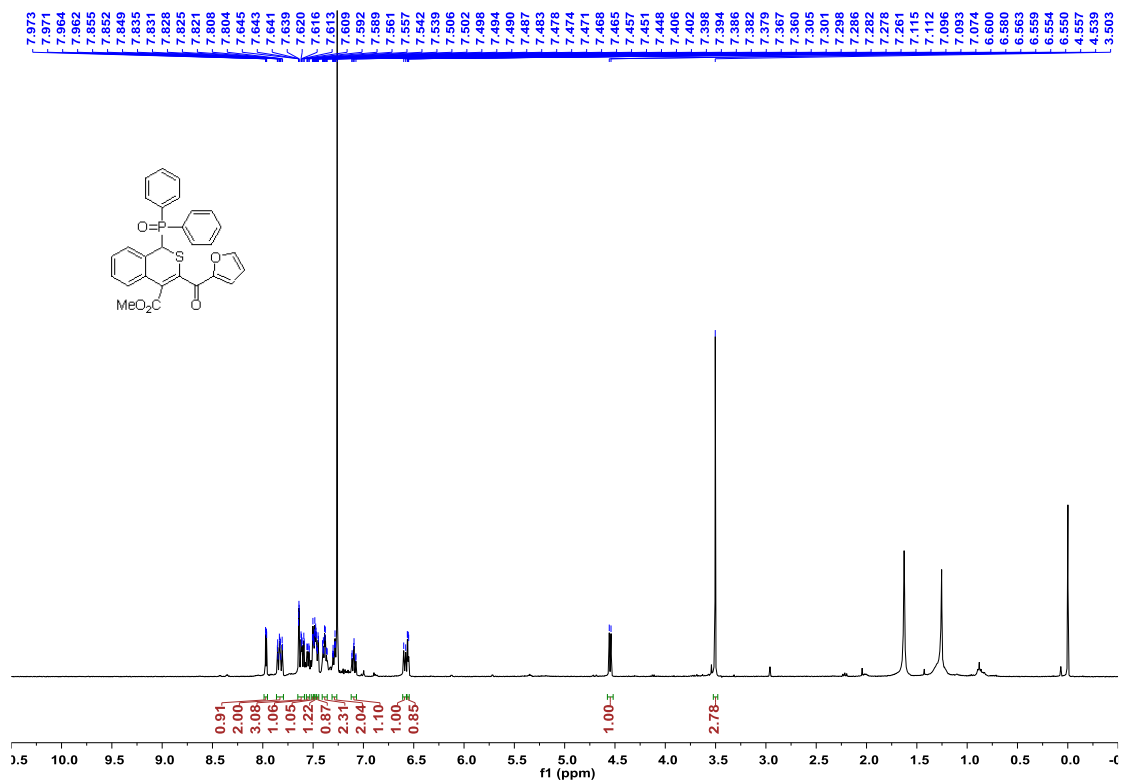

## <sup>31</sup>P NMR (162 MHz, CDCl<sub>3</sub>)

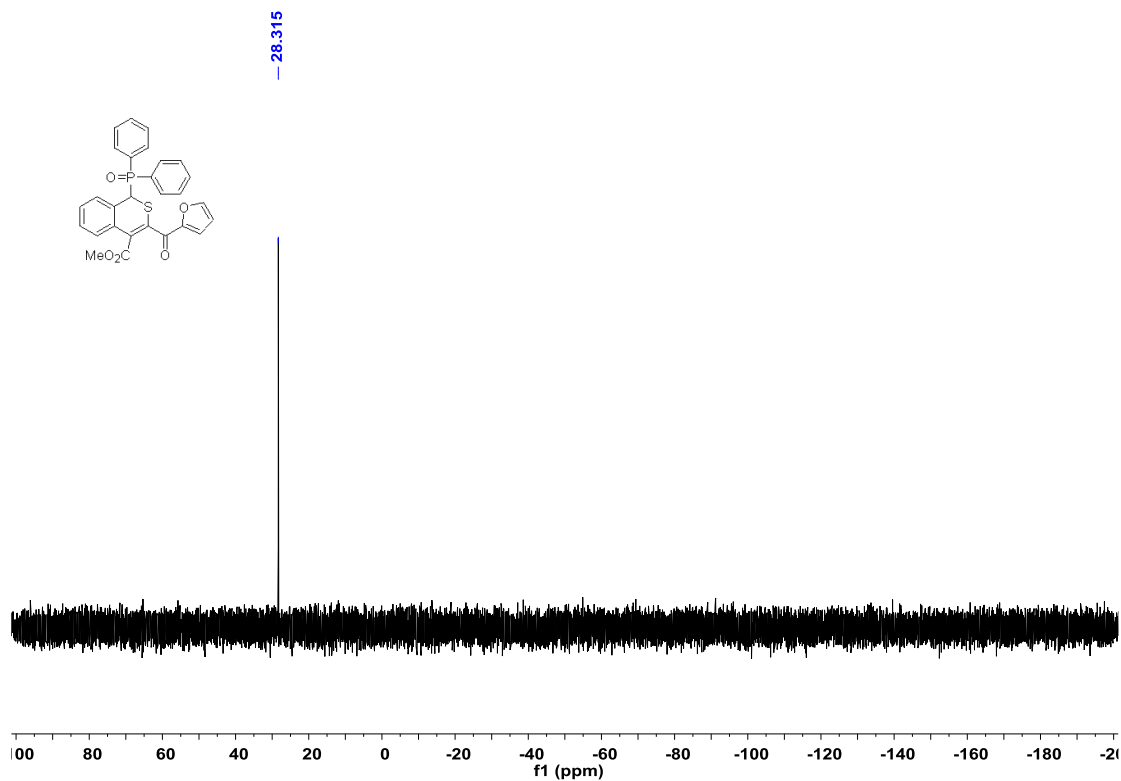

### <sup>13</sup>C NMR (101MHz, CDCl<sub>3</sub>)

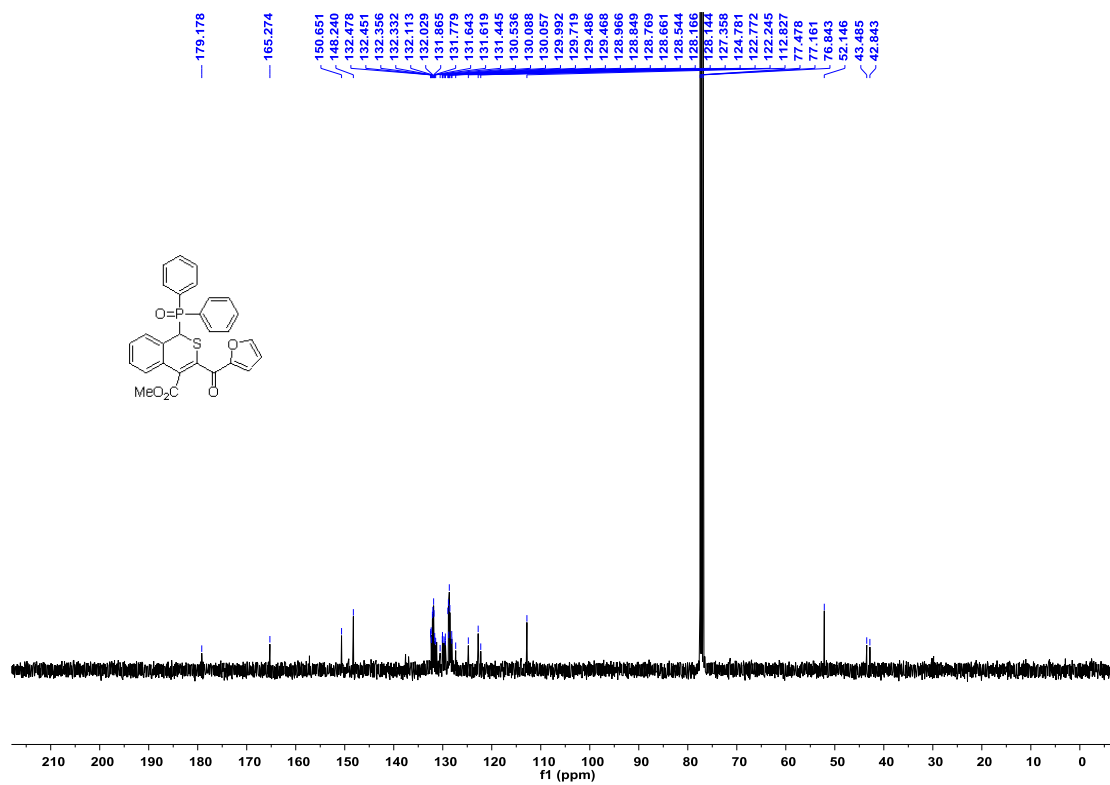

### HRMS

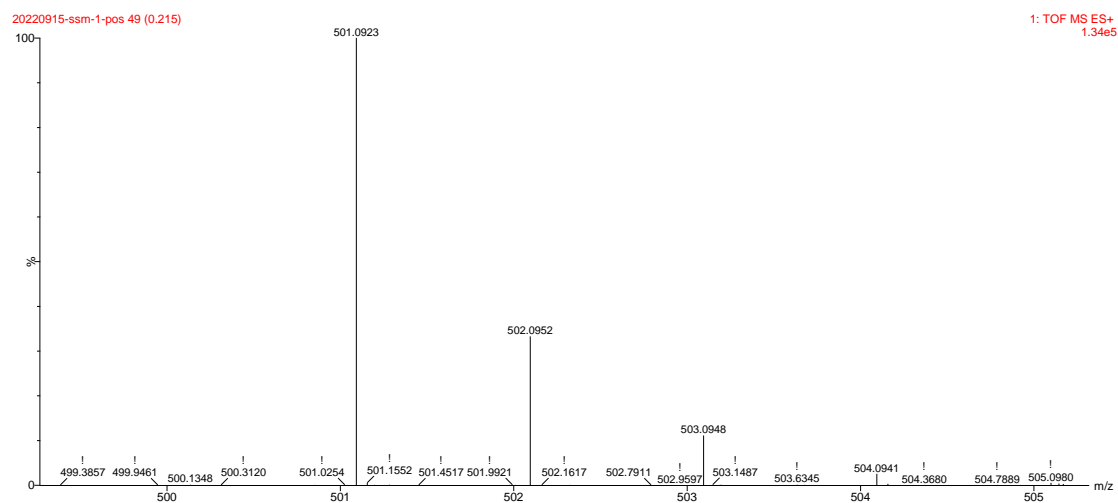

#### 4.4. Copies of $^1\text{H}$ , $^{13}\text{C}$ , $^{19}\text{F}$ NMR and HRMS Spectra of Products 4

##### Dimethyl 1-phenylindolizine-2,3-dicarboxylate (4aa)

##### $^1\text{H}$ NMR (400MHz, $\text{CDCl}_3$ )

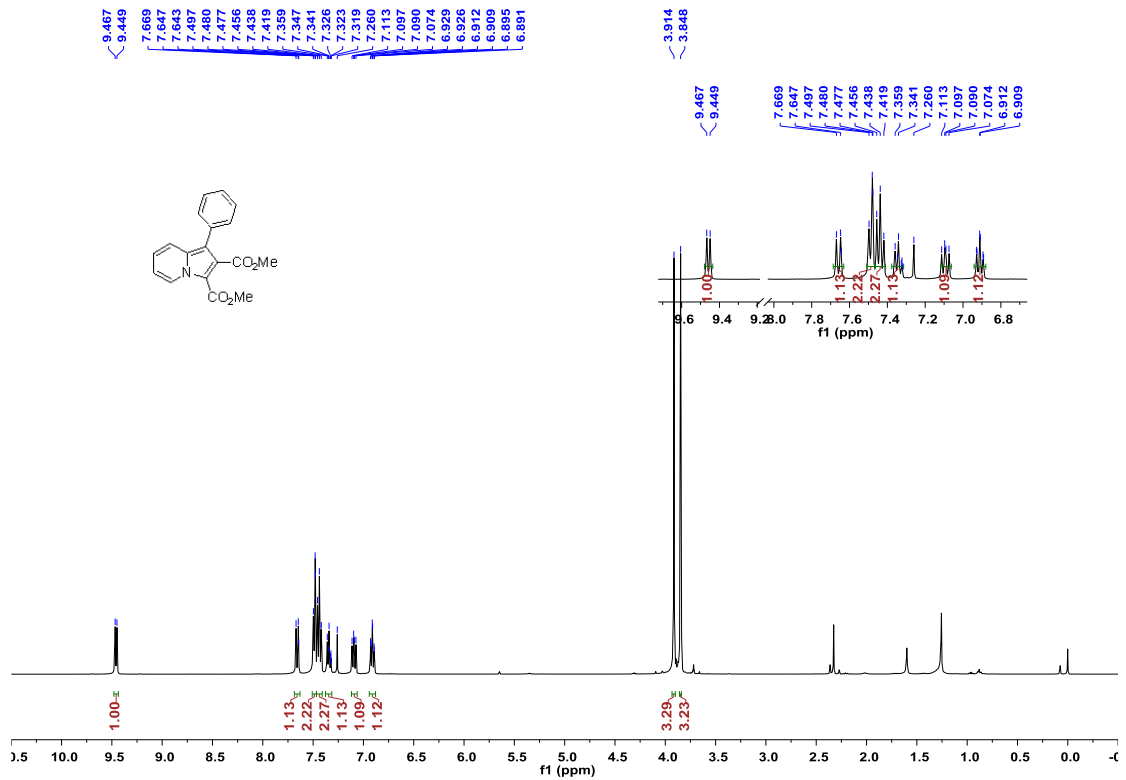

##### $^{13}\text{C}$ NMR (101MHz, $\text{CDCl}_3$ )

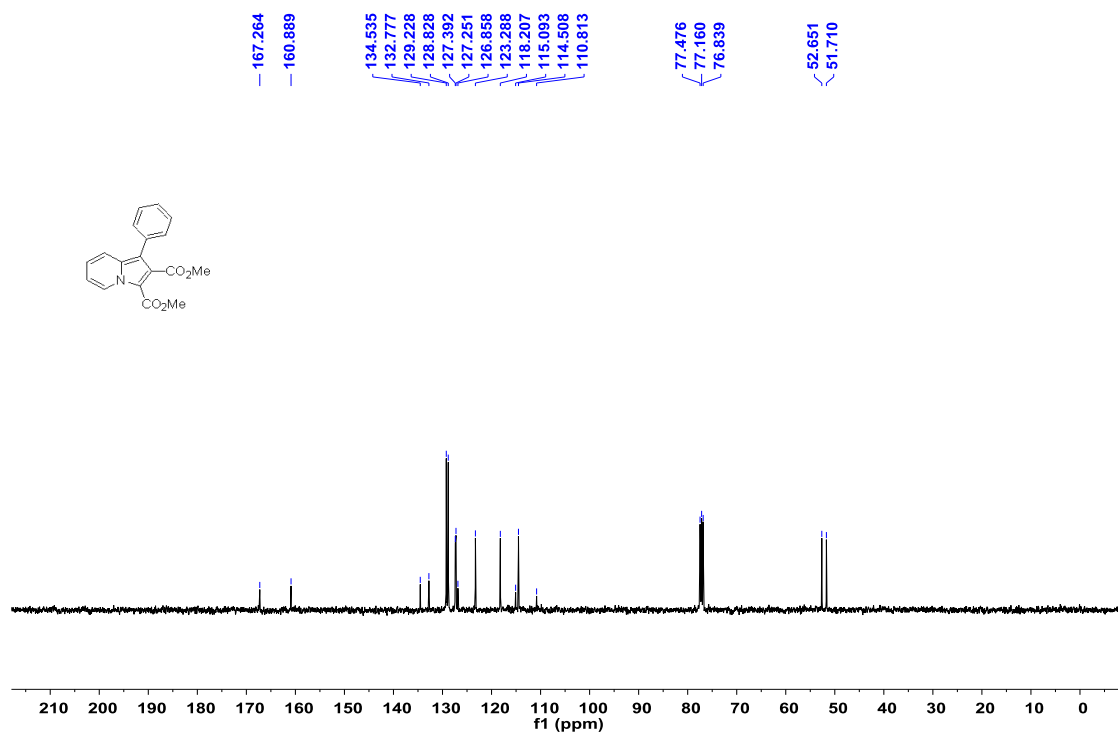

## Dimethyl 5-methyl-1-phenylindolizine-2,3-dicarboxylate (4g)

### $^1\text{H NMR}$ (400MHz, $\text{CDCl}_3$ )

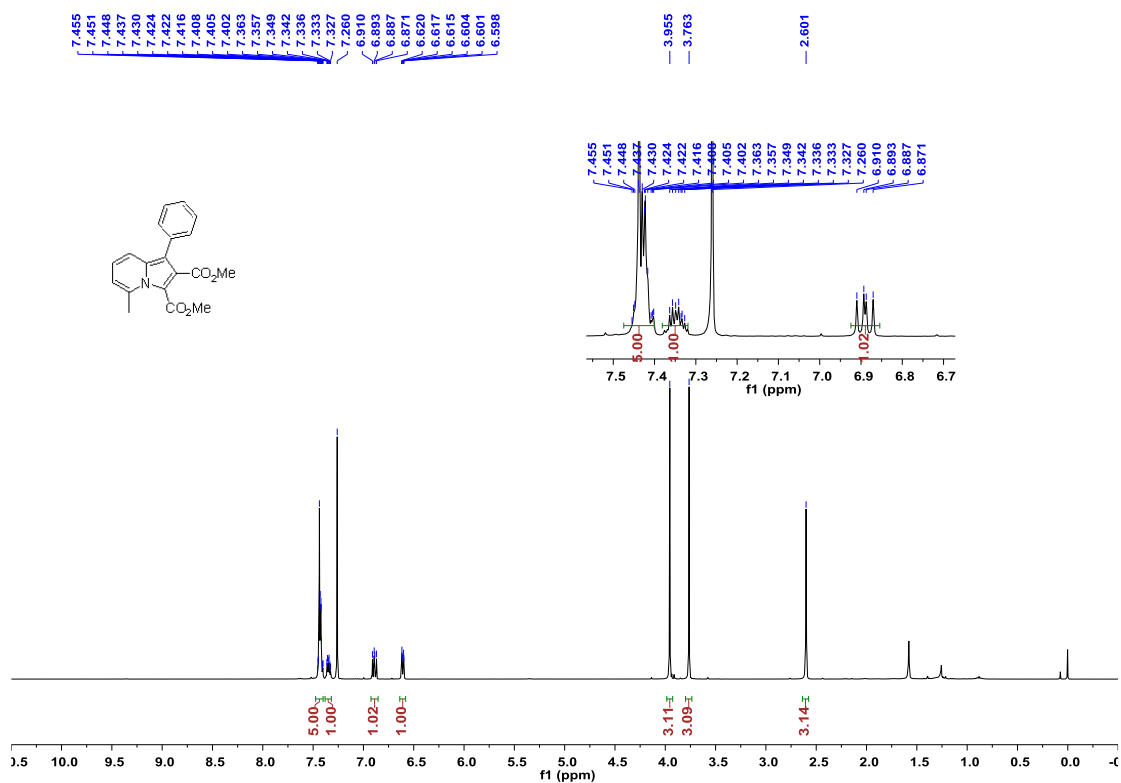

### $^{13}\text{C NMR}$ (101MHz, $\text{CDCl}_3$ )

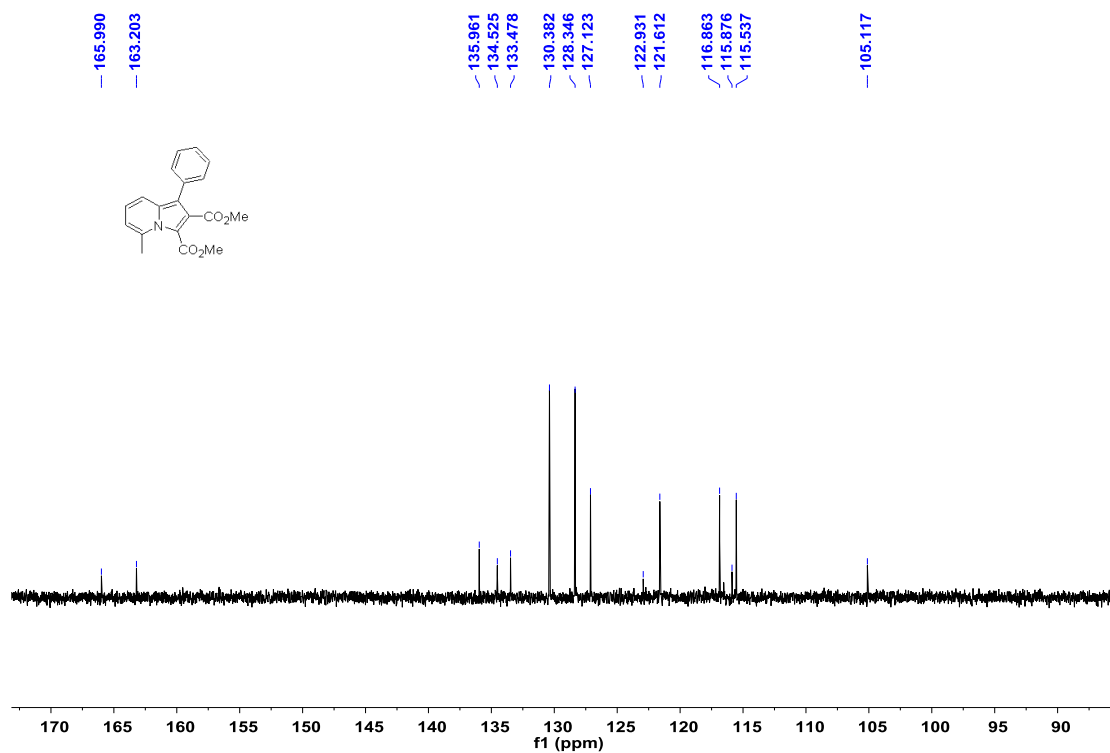

# HRMS

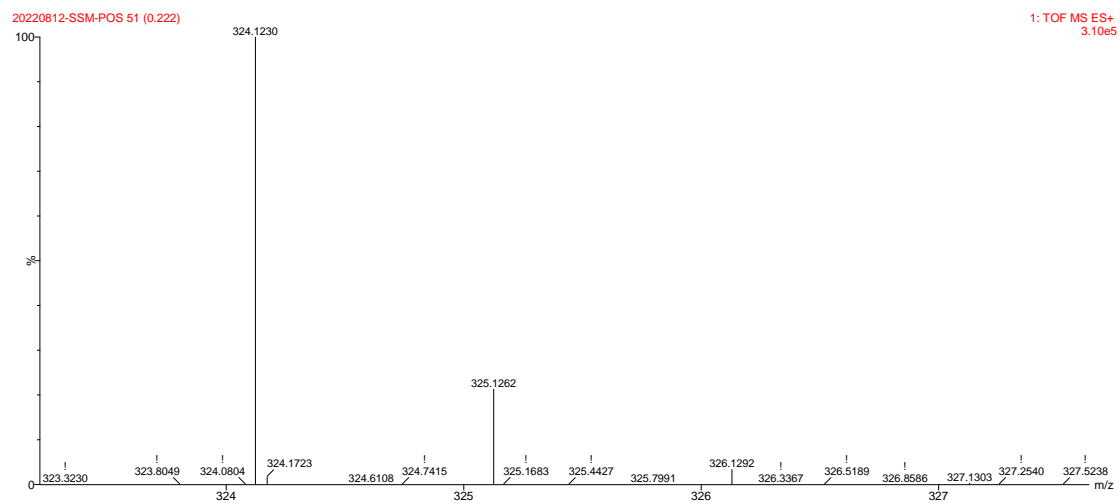

**Dimethyl 8-methyl-1-phenylindolizine-2,3-dicarboxylate (4ah) and dimethyl 6-methyl-1-phenylindolizine-2,3-dicarboxylate (4ah')**

**<sup>1</sup>H NMR (400MHz, CDCl<sub>3</sub>)**

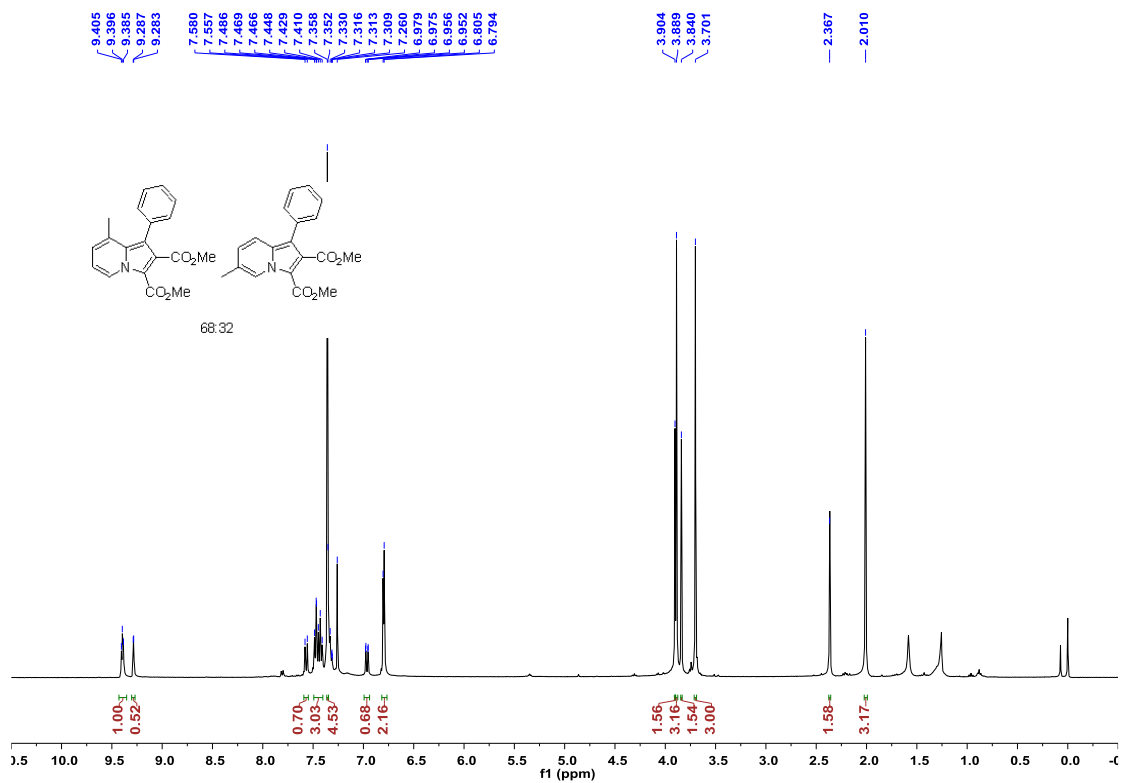

**<sup>13</sup>C NMR (101MHz, CDCl<sub>3</sub>)**

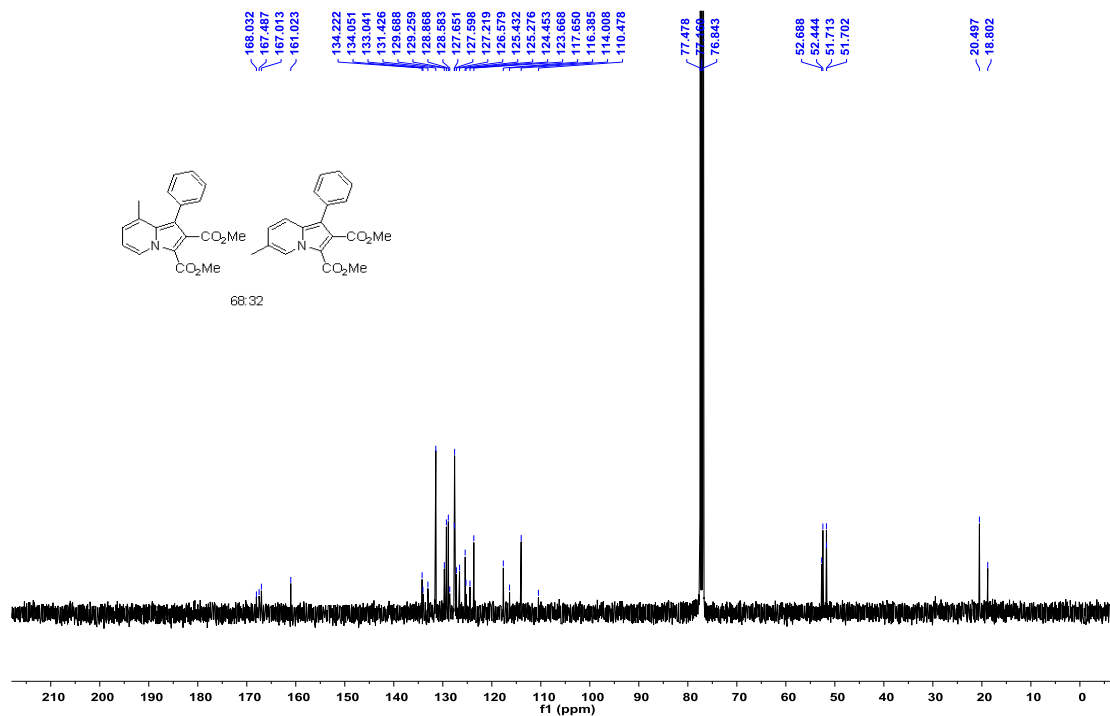

# HRMS

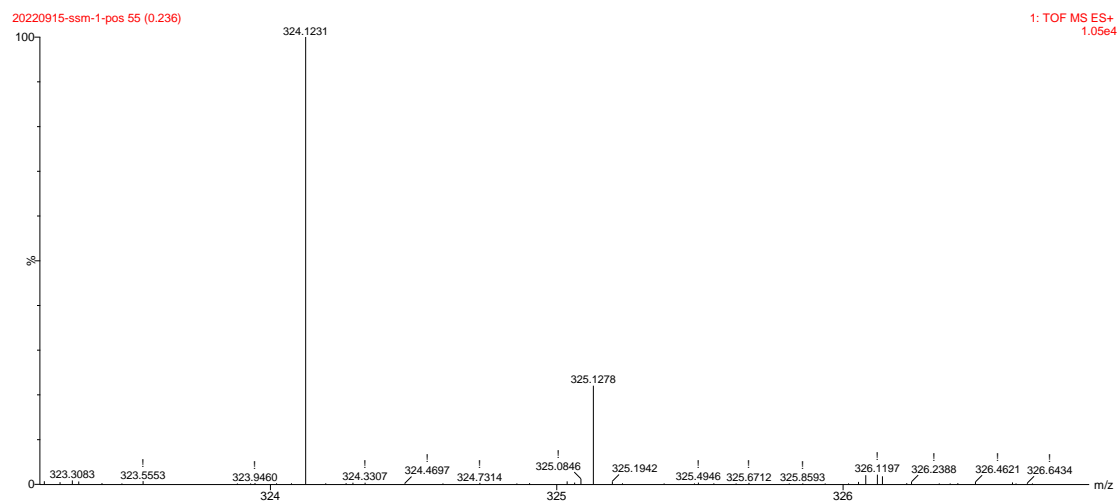



# Dimethyl 7-methyl-1-phenylindolizine-2,3-dicarboxylate (4ai)

## <sup>1</sup>H NMR (400MHz, CDCl<sub>3</sub>)

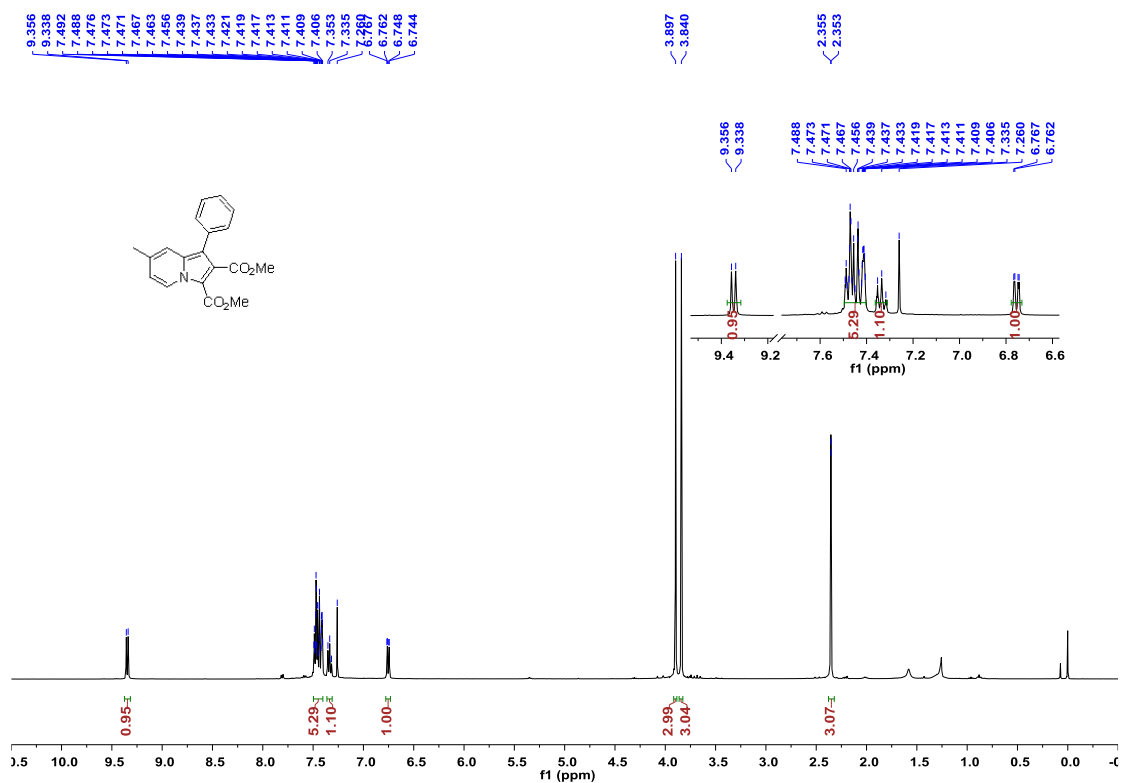

## <sup>13</sup>C NMR (101MHz, CDCl<sub>3</sub>)

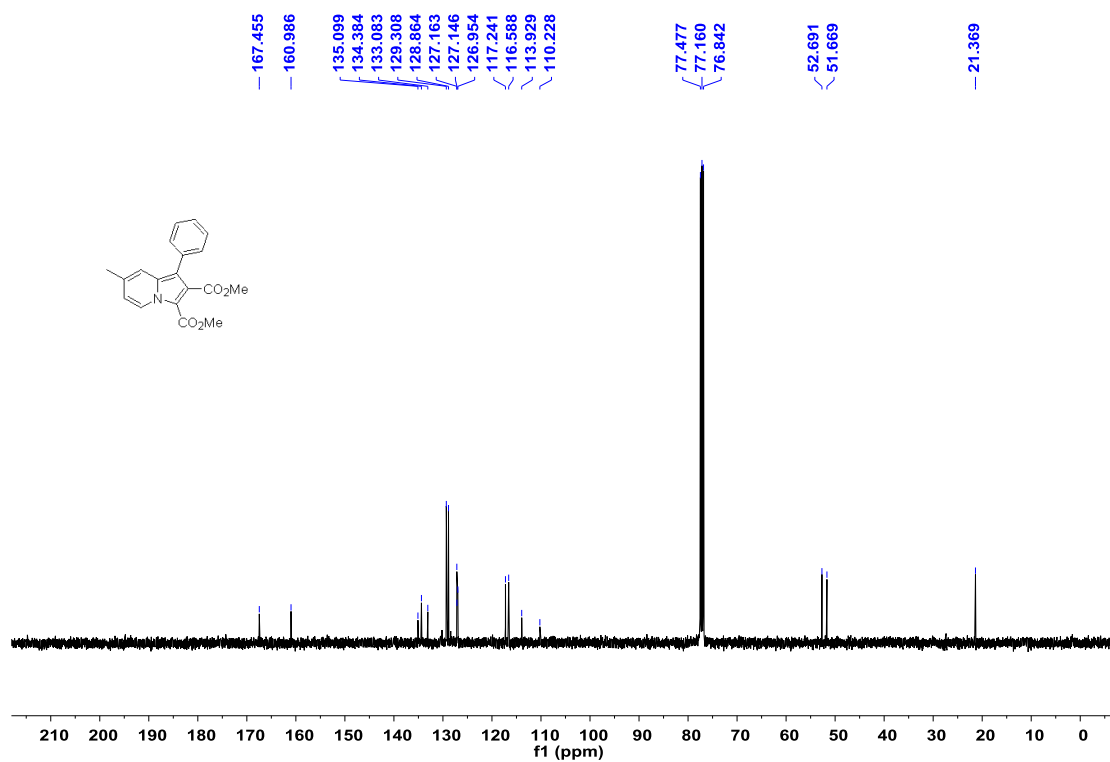

# HRMS

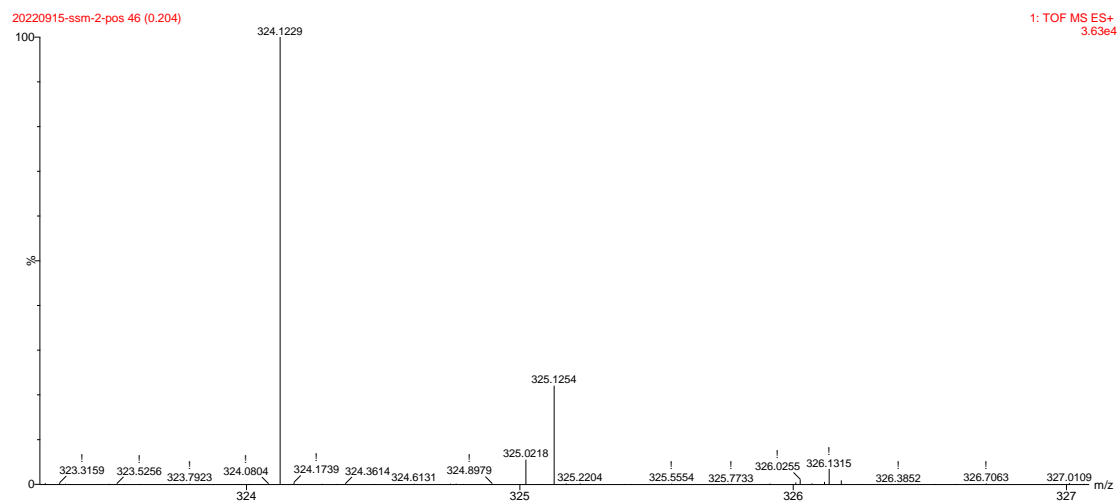

## Dimethyl 5-ethyl-1-phenylindolizine-2,3-dicarboxylate (4a)

### <sup>1</sup>H NMR (400MHz, CDCl<sub>3</sub>)

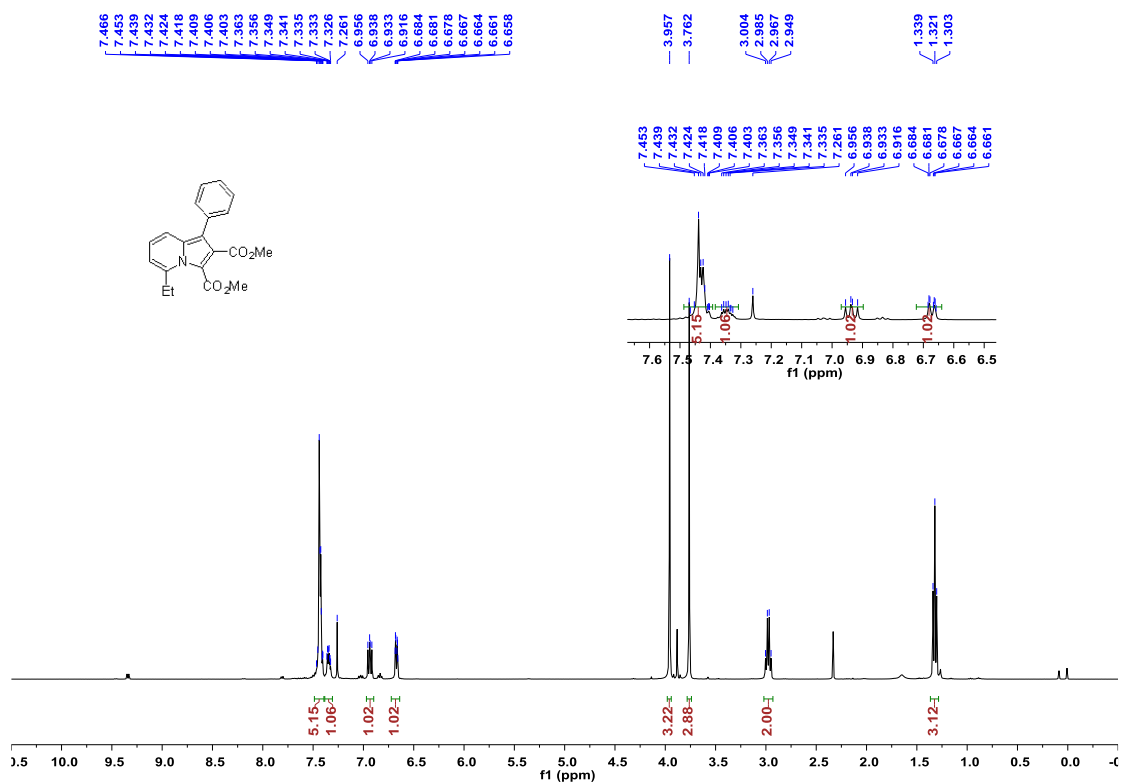

### <sup>13</sup>C NMR (101MHz, CDCl<sub>3</sub>)

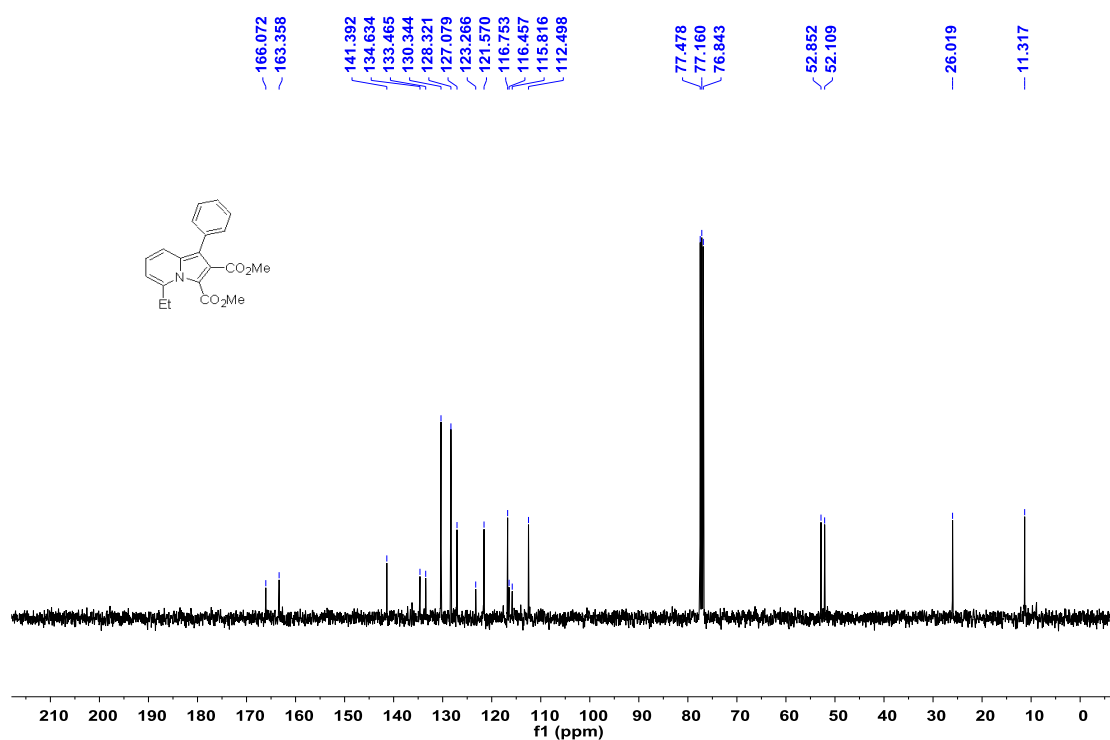

# HRMS

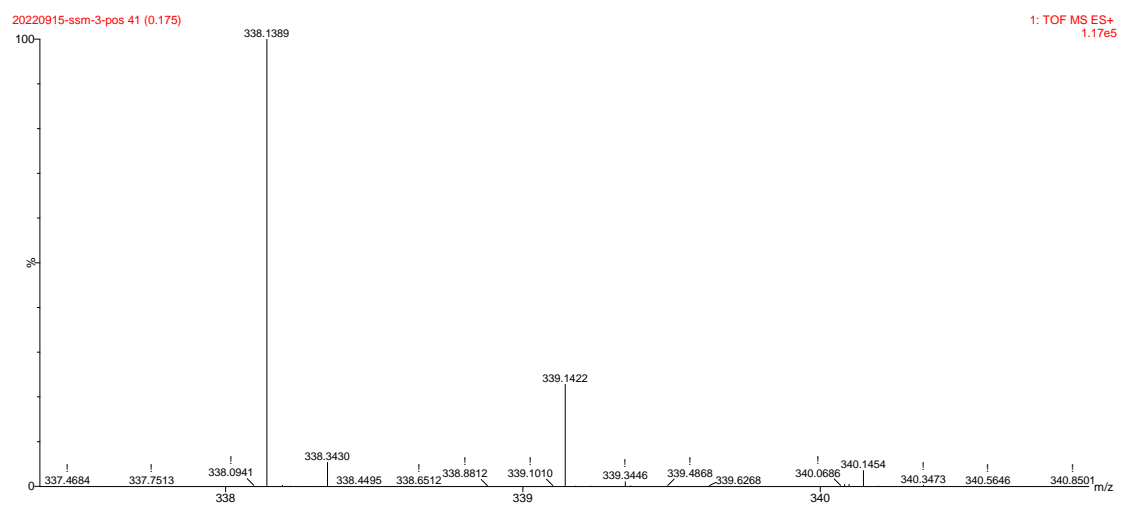

# Dimethyl 5-methyl-1-(*p*-tolyl)indolizine-2,3-dicarboxylate (4bg)

## <sup>1</sup>H NMR (400MHz, CDCl<sub>3</sub>)

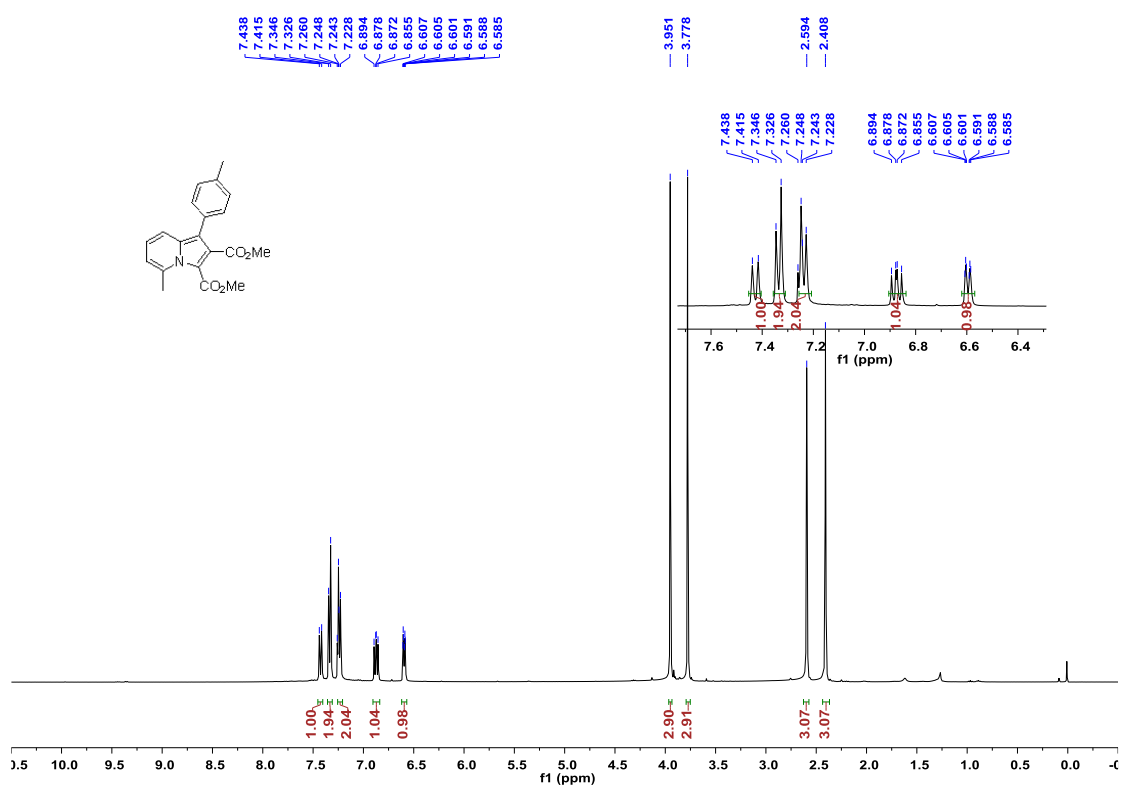

## <sup>13</sup>C NMR (101MHz, CDCl<sub>3</sub>)

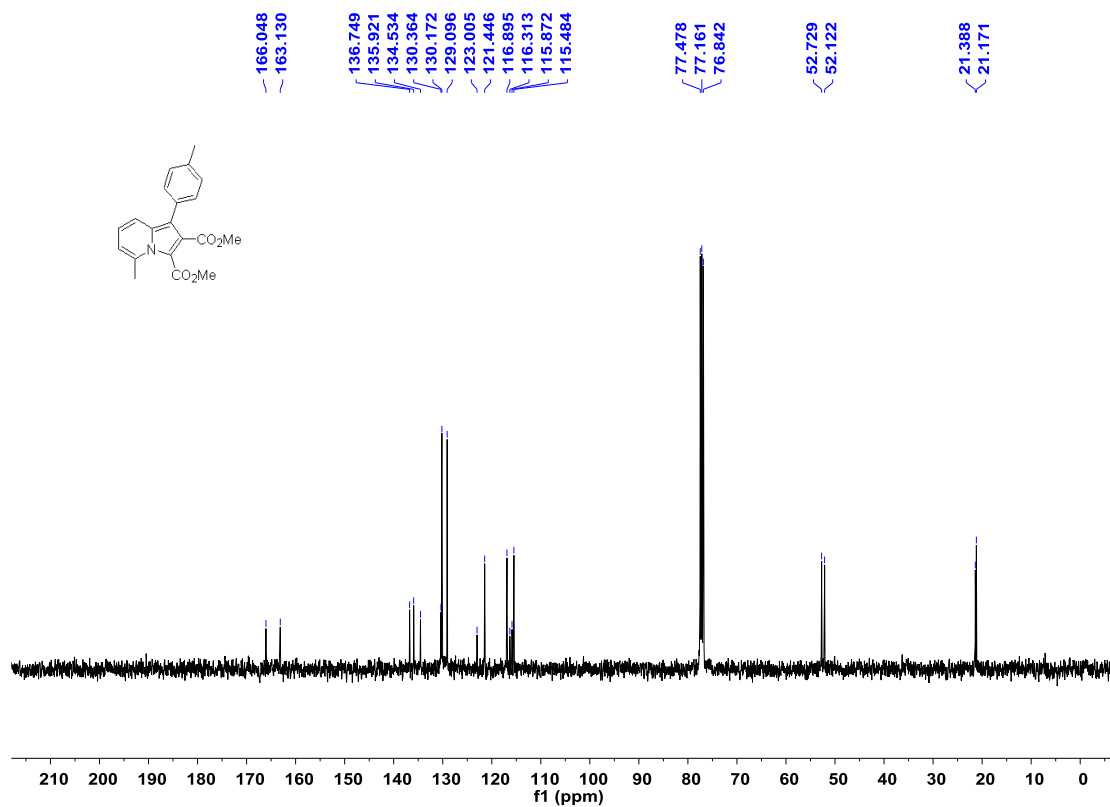

# HRMS

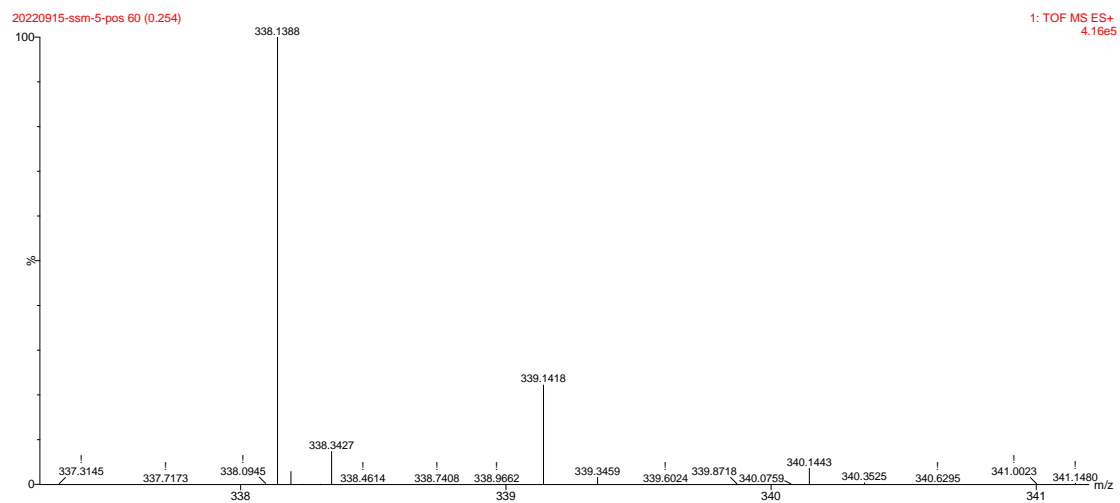

**Dimethyl 1-(4-(*tert*-butyl)phenyl)-5-methylindolizine-2,3-dicarboxylate (4c)**

**<sup>1</sup>H NMR (400MHz, CDCl<sub>3</sub>)**

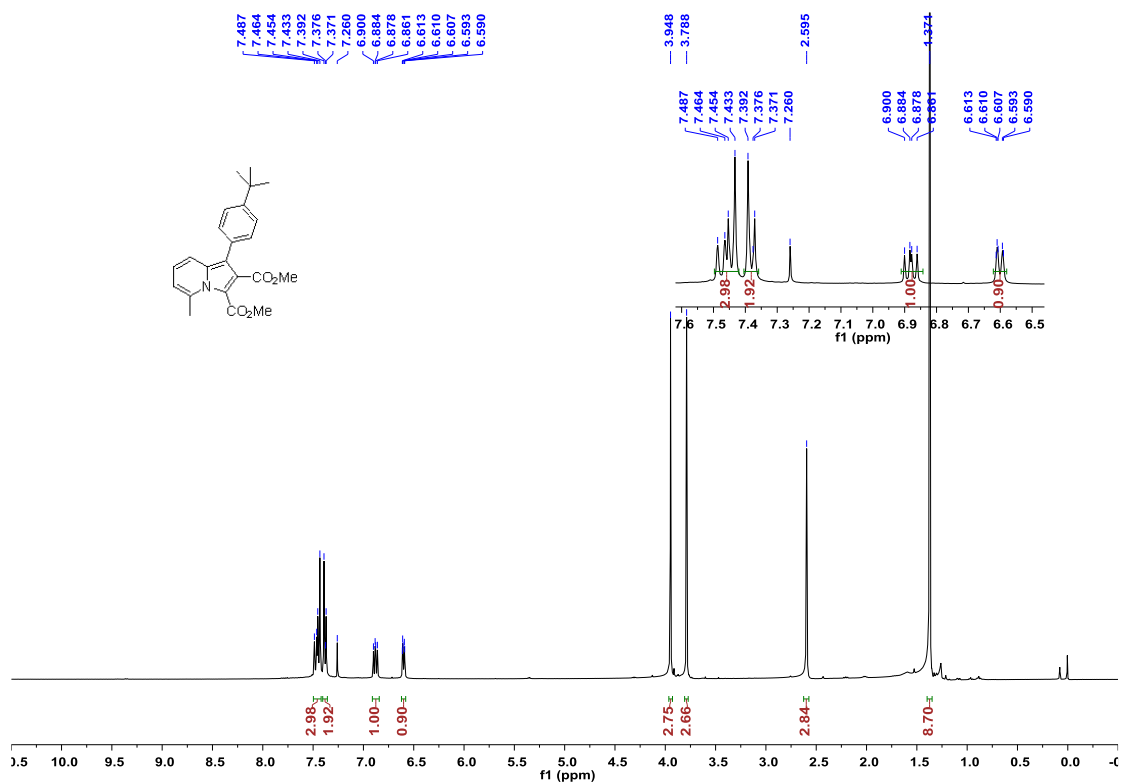

**<sup>13</sup>C NMR (101MHz, CDCl<sub>3</sub>)**

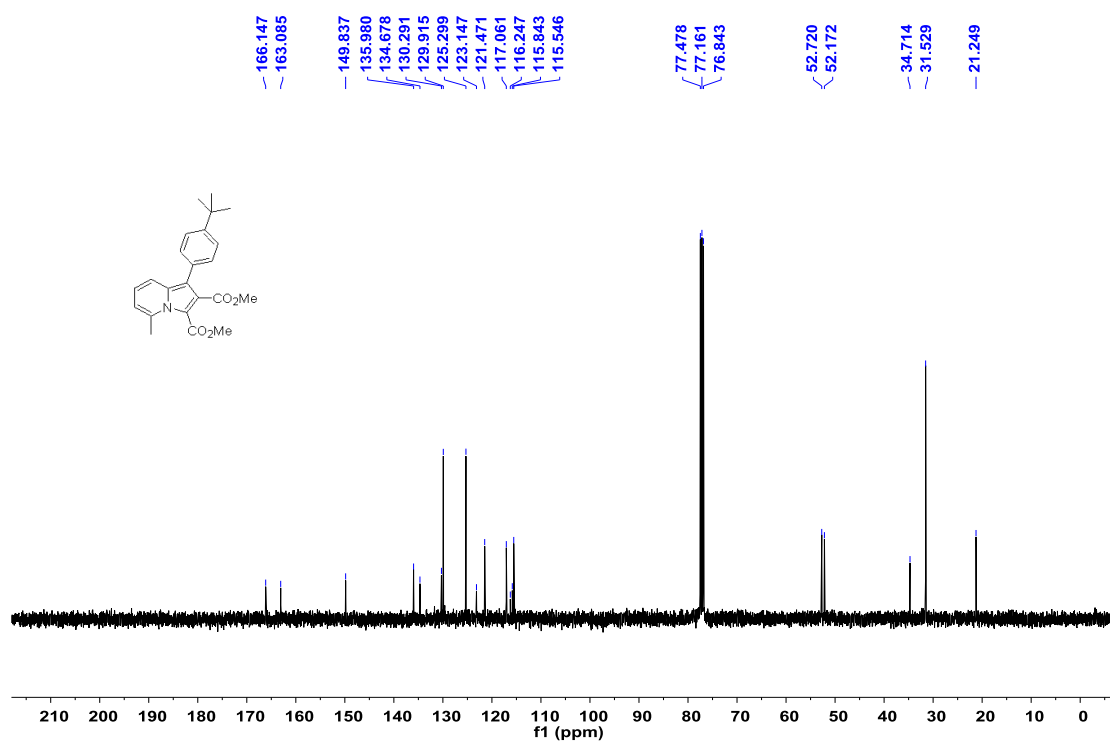

# HRMS

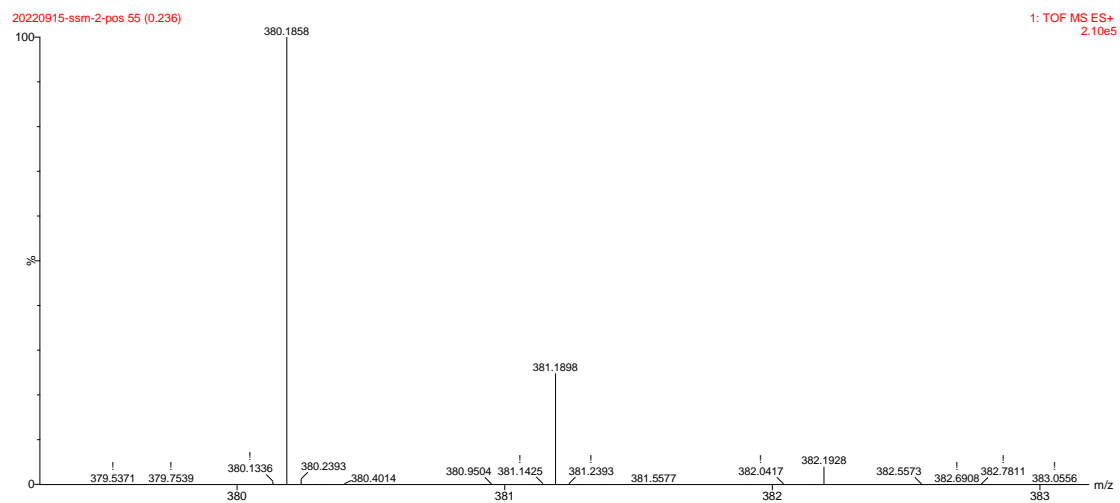



## Dimethyl 1-(4-methoxyphenyl)-5-methylindolizine-2,3-dicarboxylate (4dg)

### <sup>1</sup>H NMR (400MHz, CDCl<sub>3</sub>)

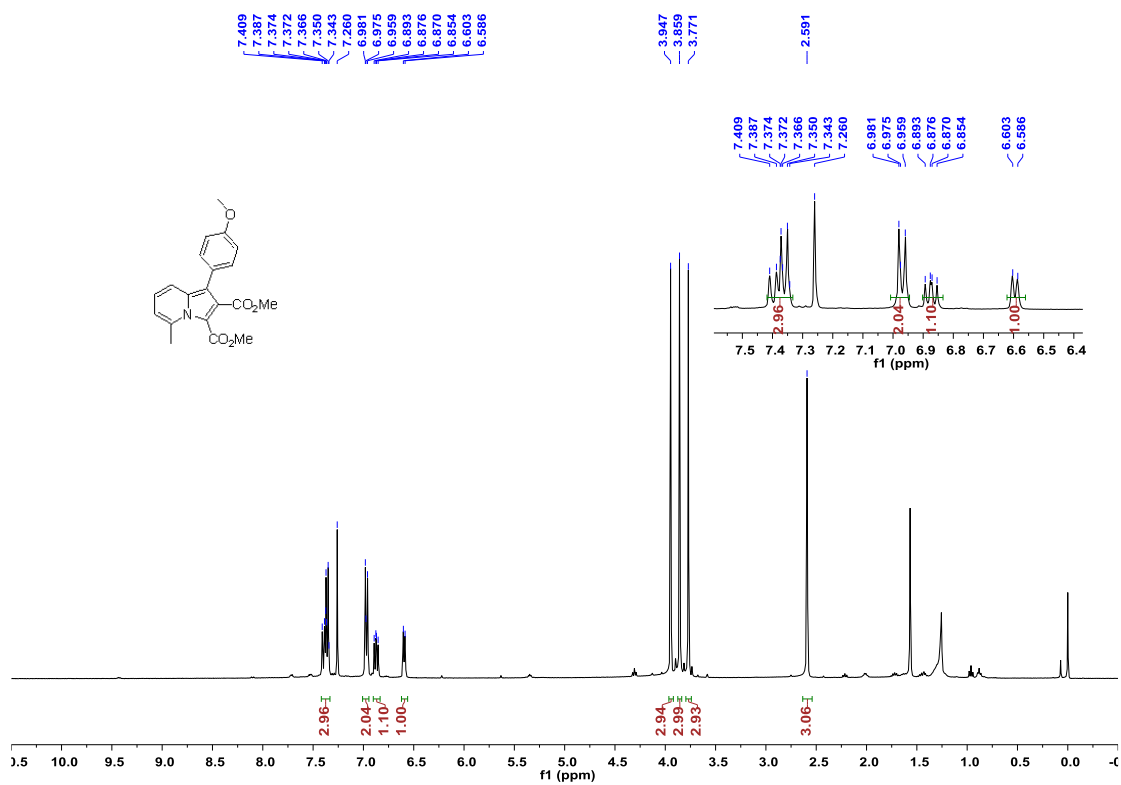

### <sup>13</sup>C NMR (101MHz, CDCl<sub>3</sub>)

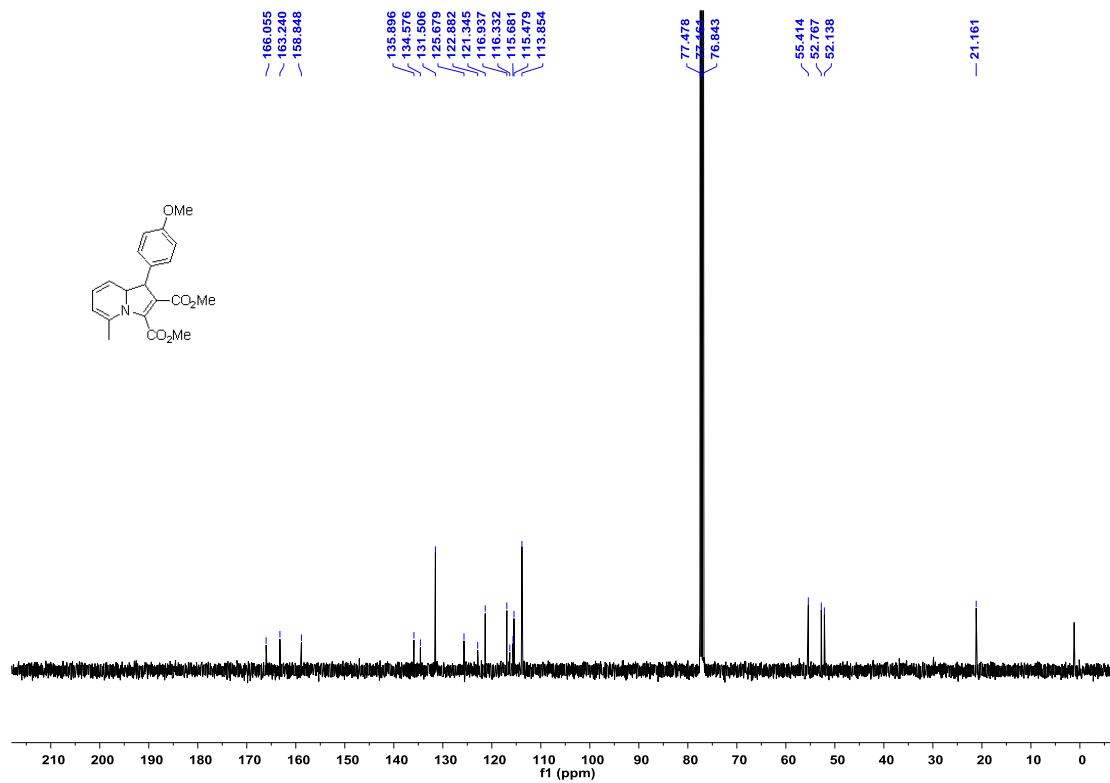

# HRMS

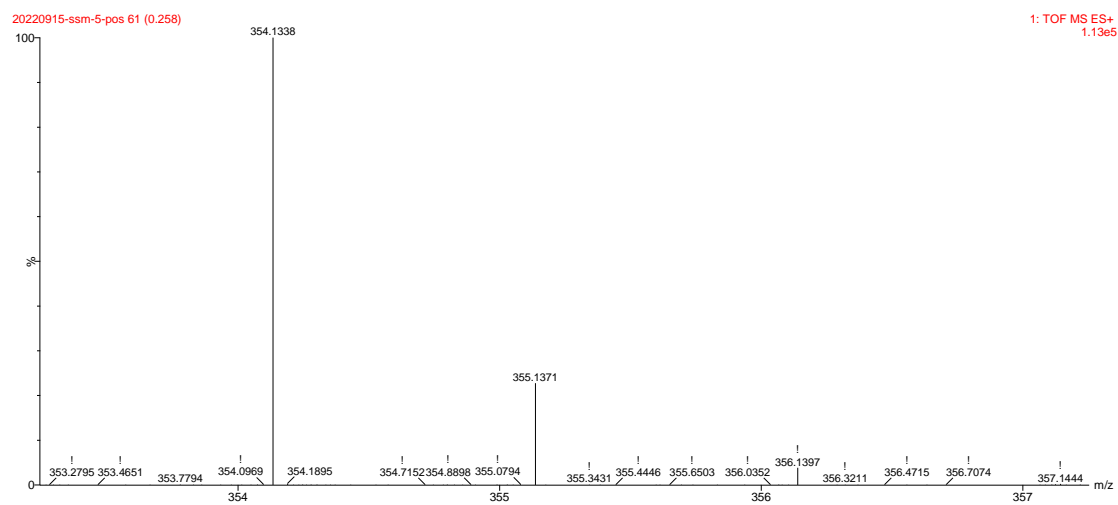

# Dimethyl 1-(4-chlorophenyl)-5-methylindolizine-2,3-dicarboxylate (4eg)

## <sup>1</sup>H NMR (400MHz, CDCl<sub>3</sub>)

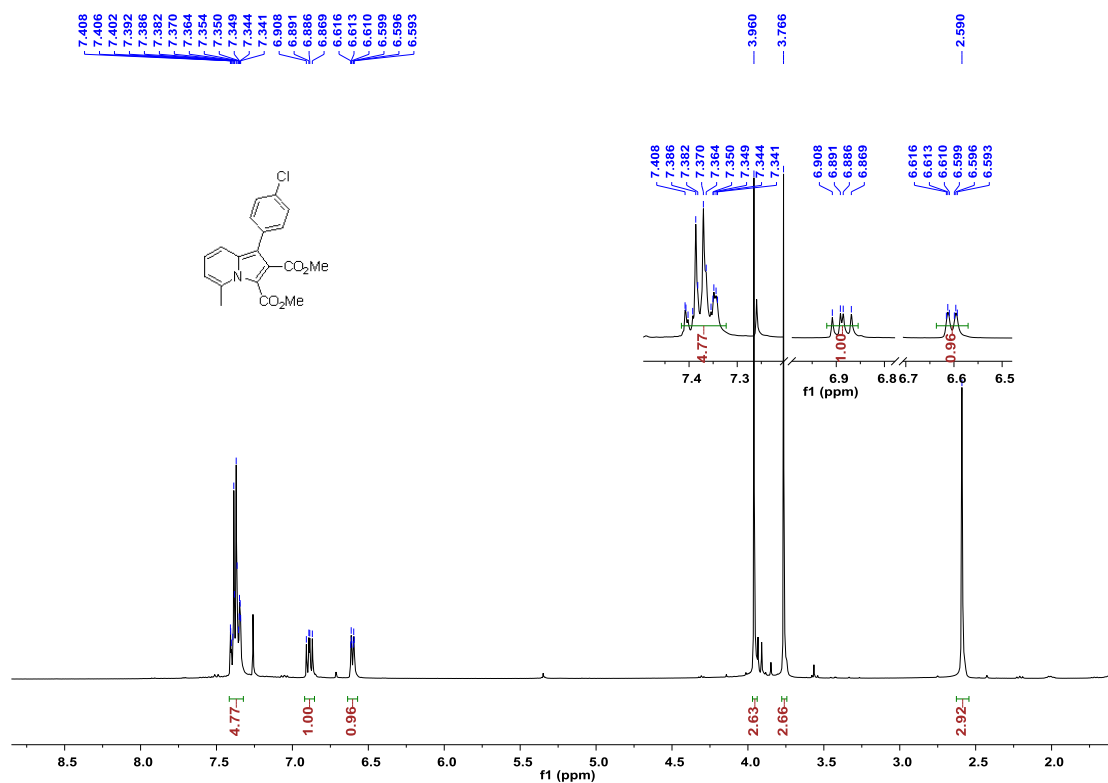

## <sup>13</sup>C NMR (101MHz, CDCl<sub>3</sub>)

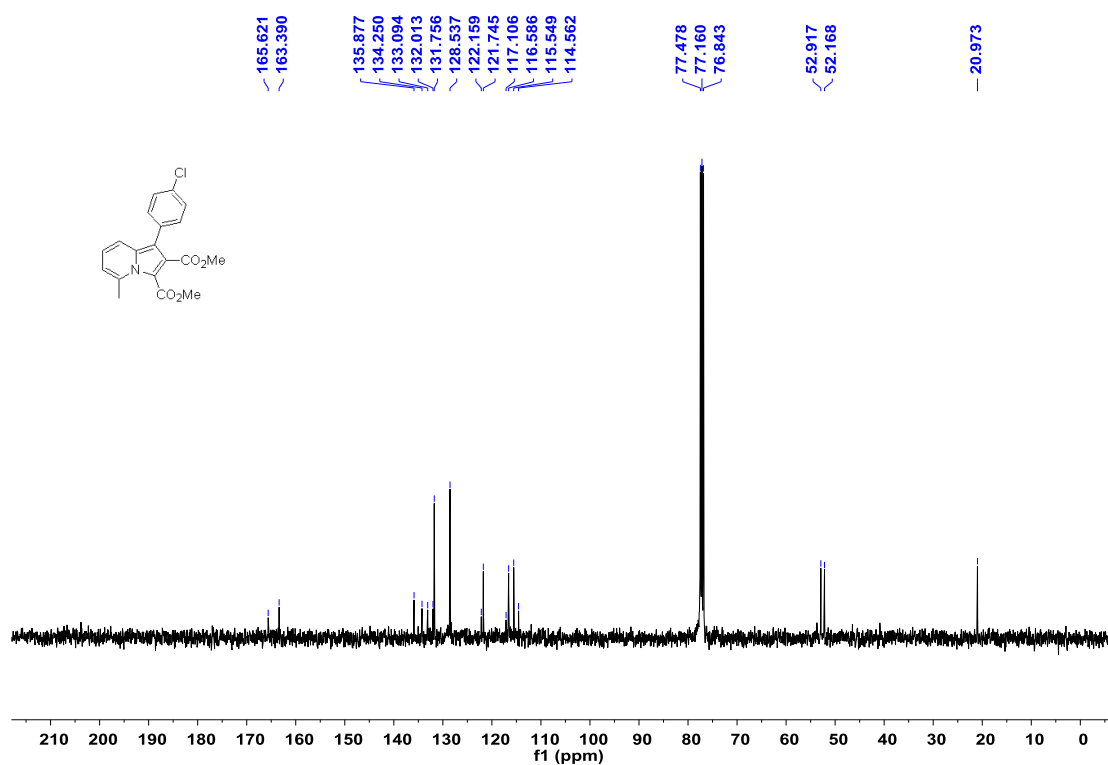

# HRMS

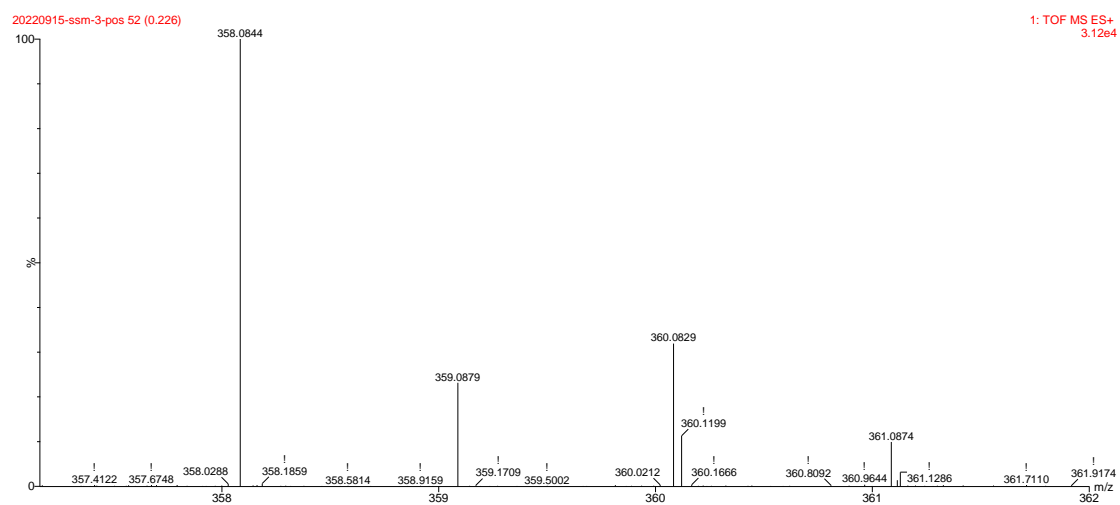

# Dimethyl 1-(2-fluorophenyl)-5-methylindolizine-2,3-dicarboxylate (4gg)

## <sup>1</sup>H NMR (400MHz, CDCl<sub>3</sub>)

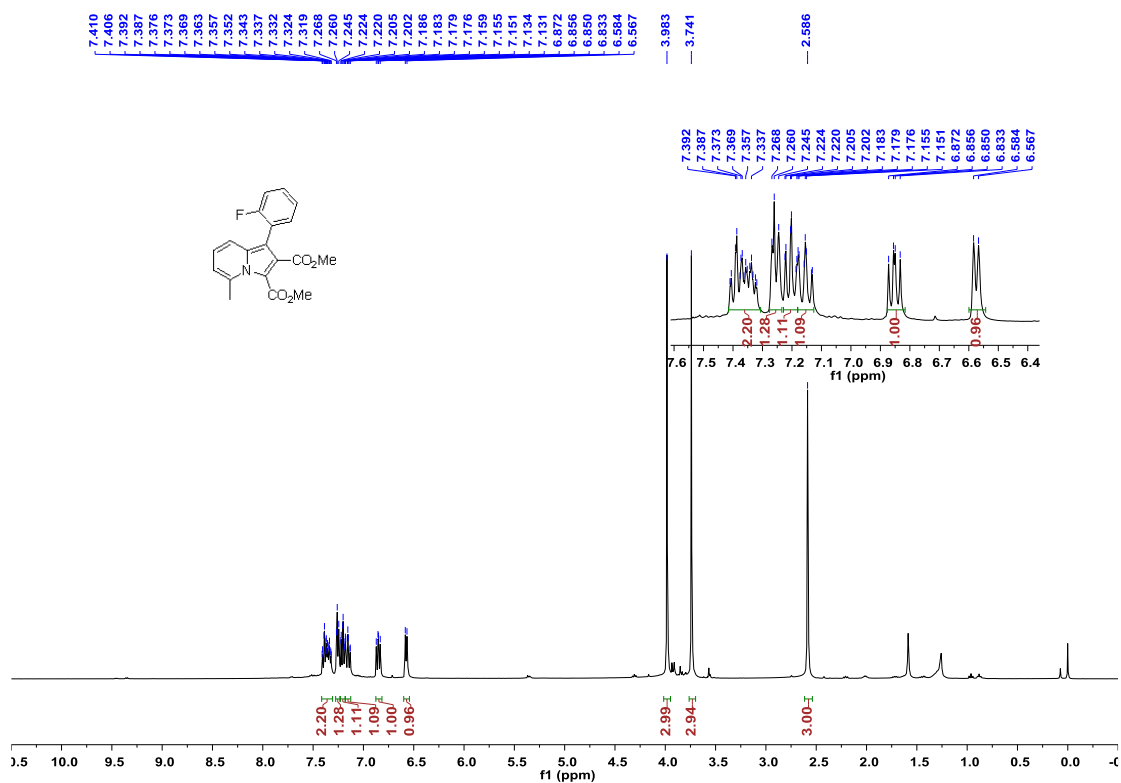

## <sup>13</sup>C NMR (101MHz, CDCl<sub>3</sub>)

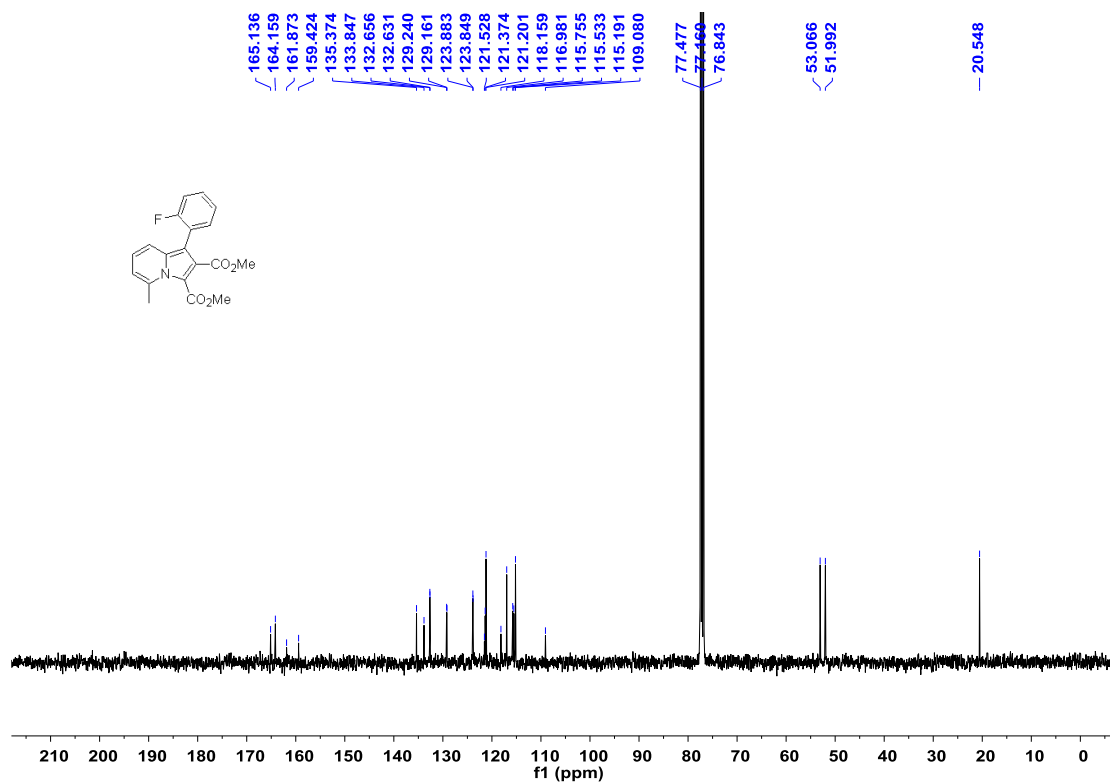

**<sup>19</sup>F NMR (376MHz, CDCl<sub>3</sub>)**

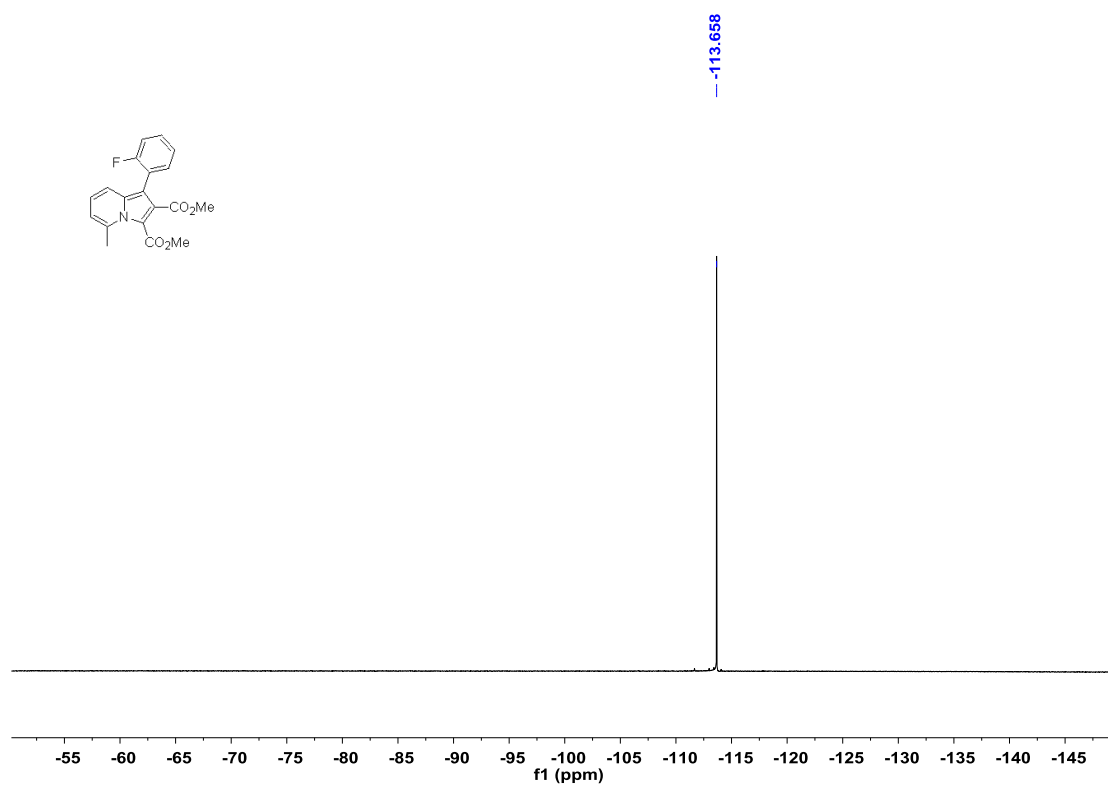

**HRMS**

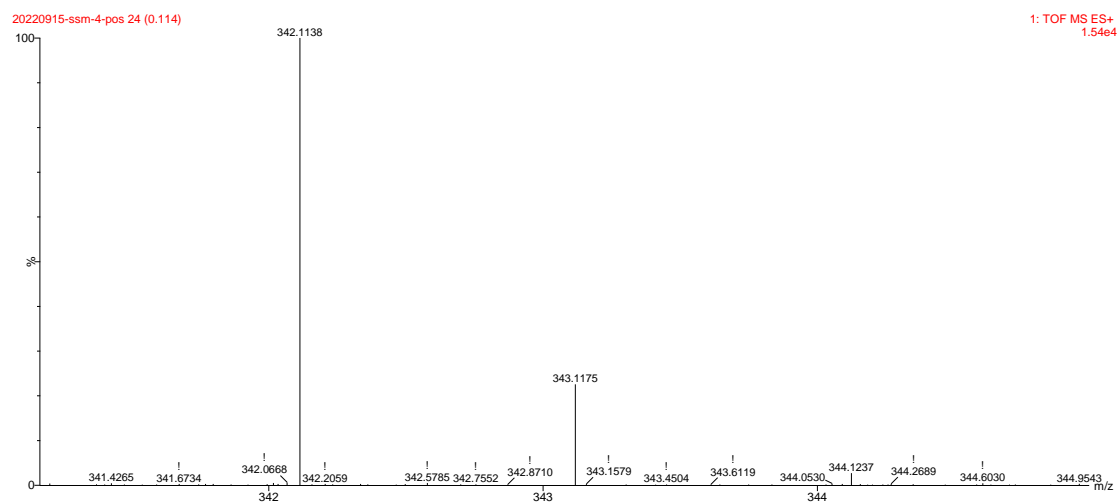

# Dimethyl 5-(dimethoxymethyl)-1-phenylindolizine-2,3-dicarboxylate (4a)

## <sup>1</sup>H NMR (400MHz, CDCl<sub>3</sub>)

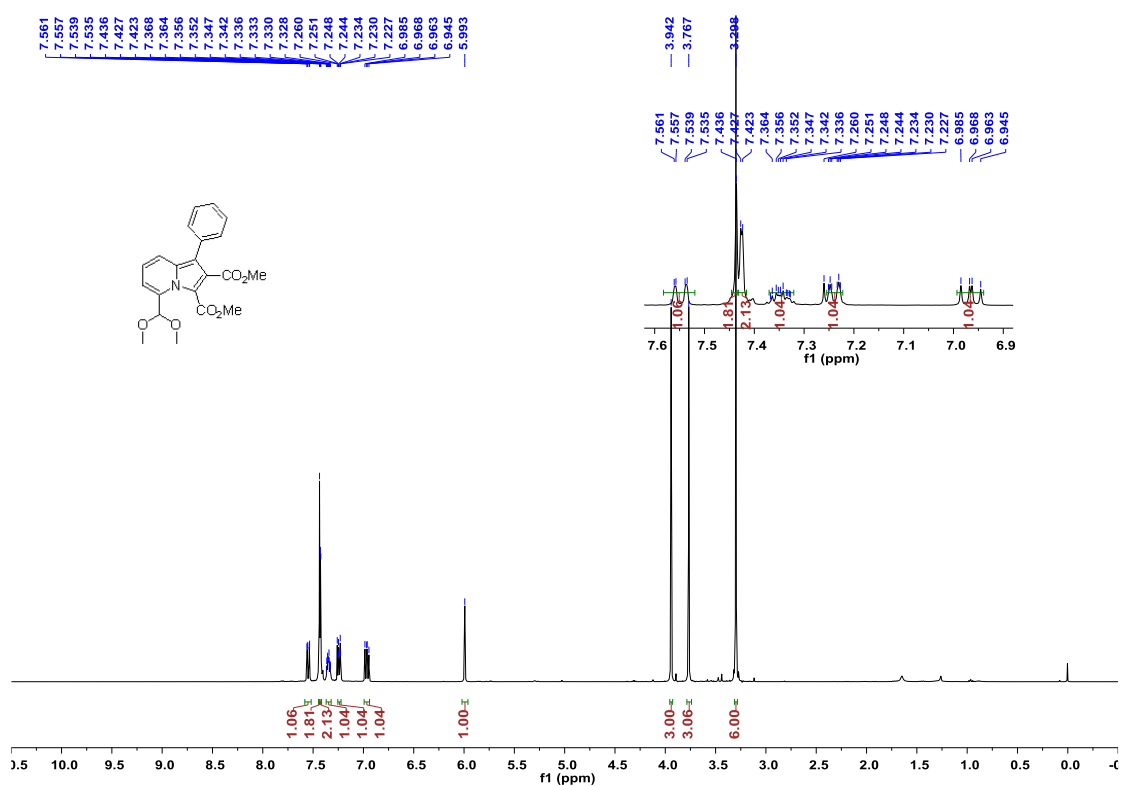

## <sup>13</sup>C NMR (101MHz, CDCl<sub>3</sub>)

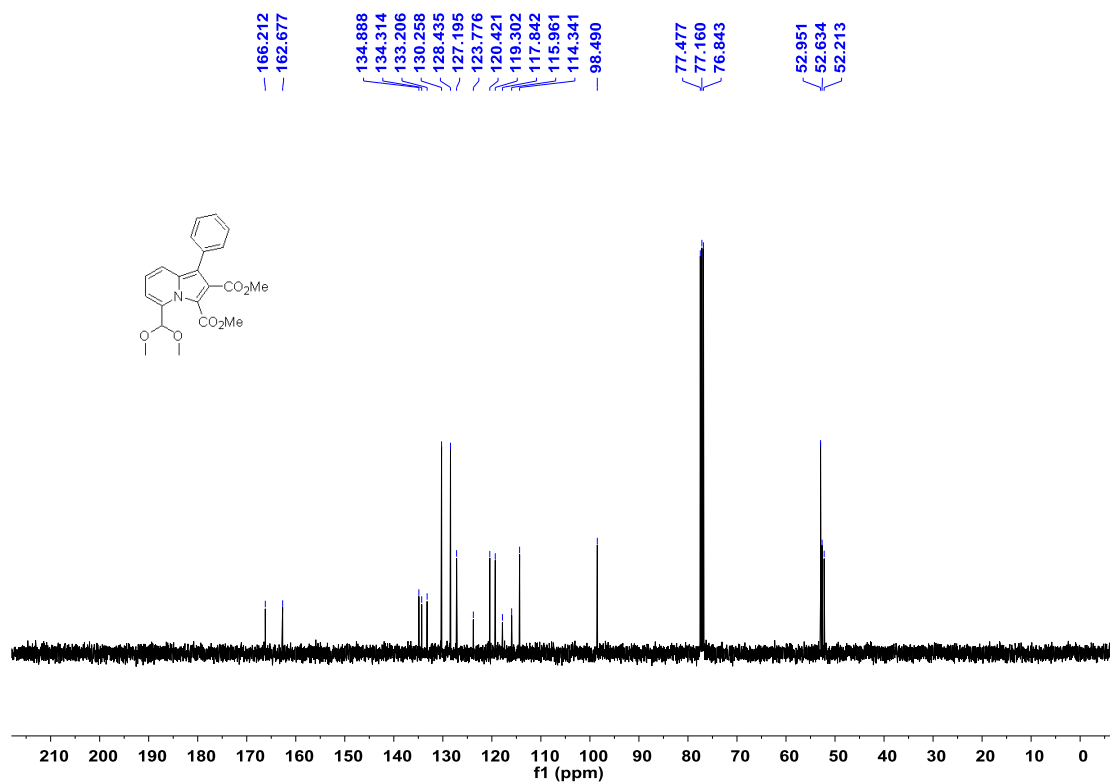

# HRMS

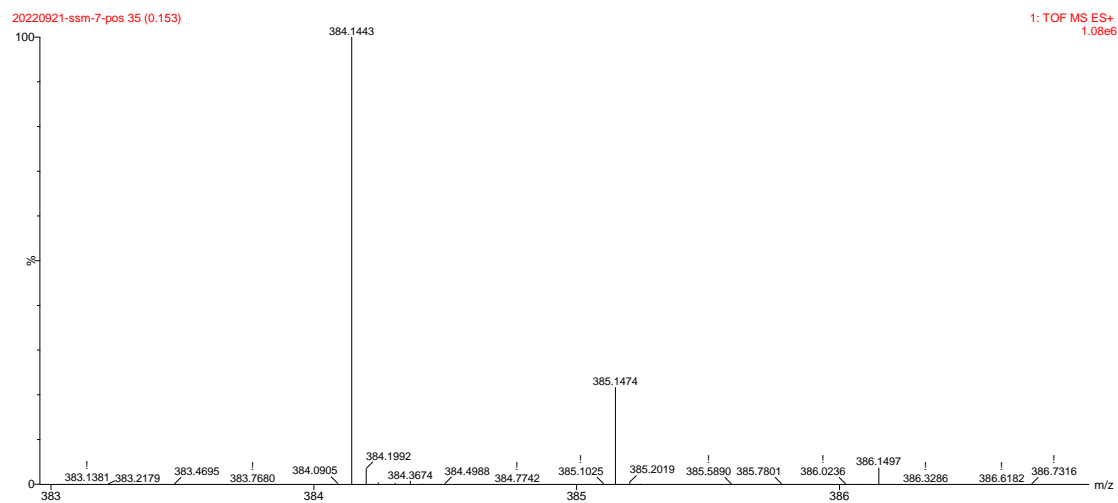



## 4.5. Copies of $^1\text{H}$ , $^{13}\text{C}$ NMR and HRMS Spectra of Applications

### Dimethyl 1-oxo-1*H*-isothiochromene-3,4-dicarboxylate (7)

#### $^1\text{H}$ NMR (400MHz, $\text{CDCl}_3$ )

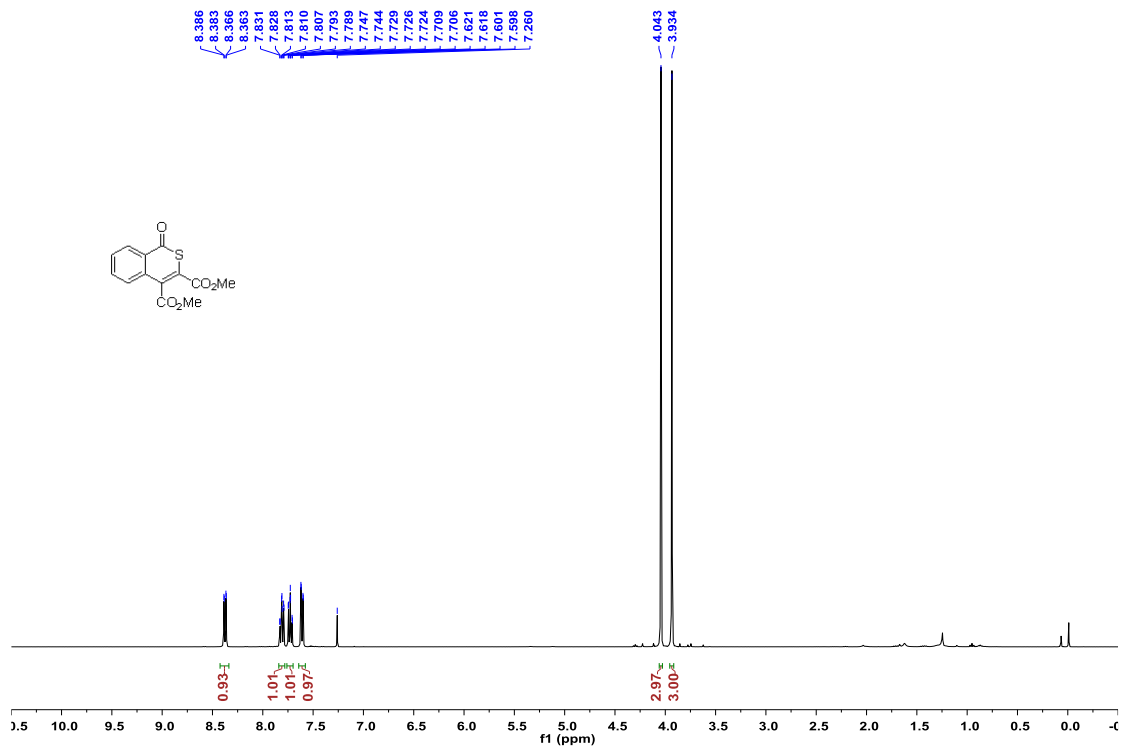

#### $^{13}\text{C}$ NMR (101MHz, $\text{CDCl}_3$ )

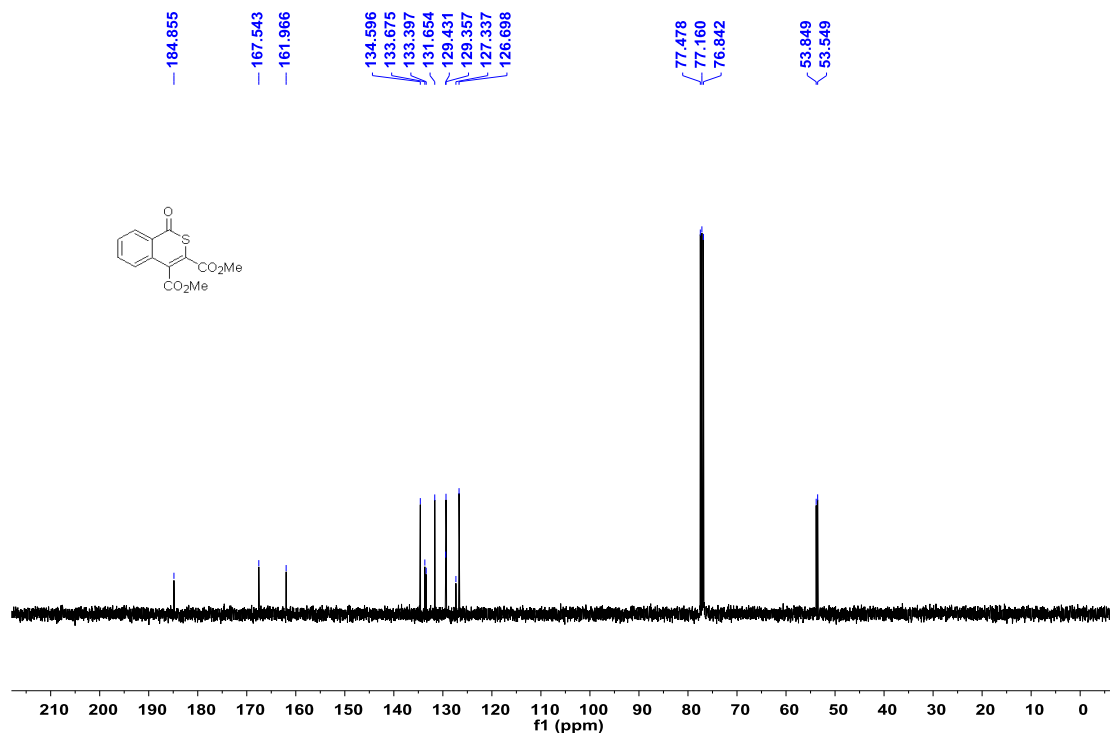

# HRMS

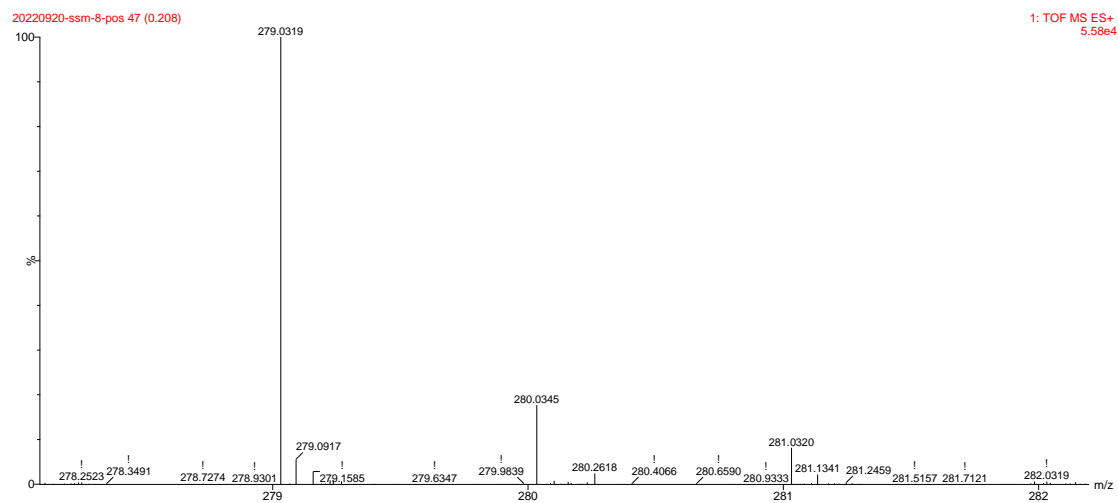

**Dimethyl 5-formyl-1-phenyl-1,8a-dihydroindolizine-2,3-dicarboxylate (8)**

**<sup>1</sup>H NMR (400MHz, CDCl<sub>3</sub>)**

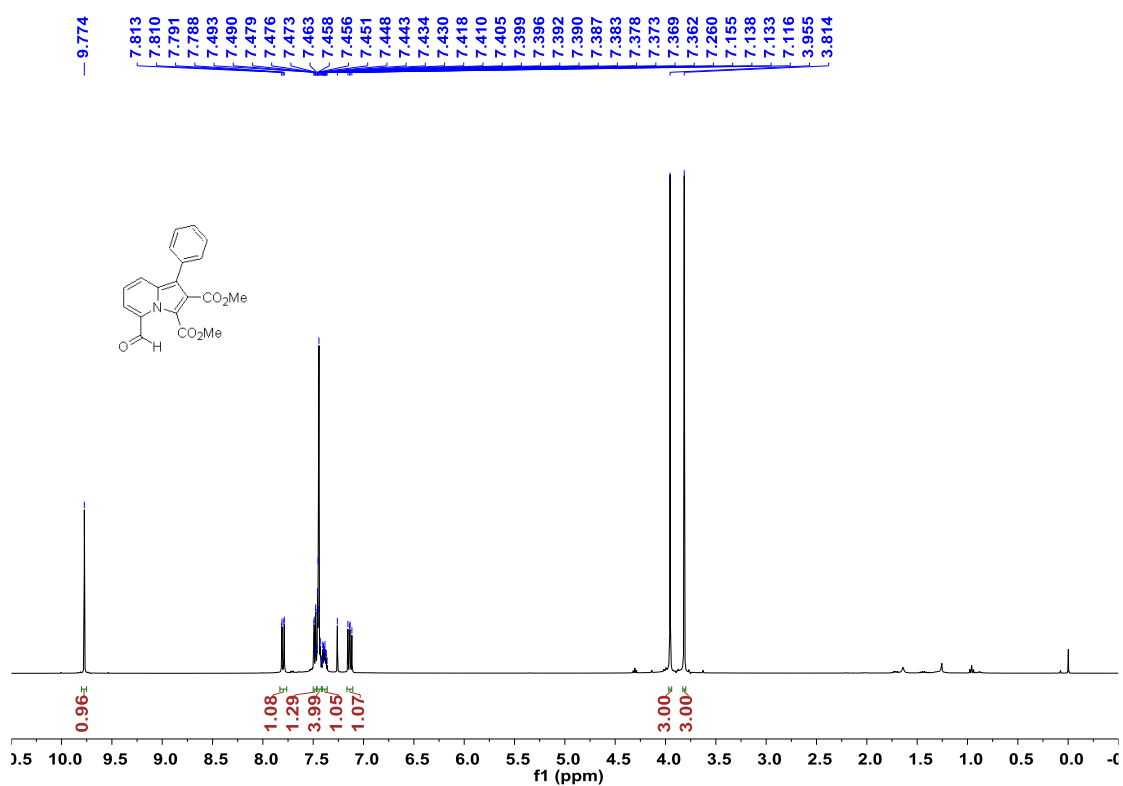

**<sup>13</sup>C NMR (101MHz, CDCl<sub>3</sub>)**

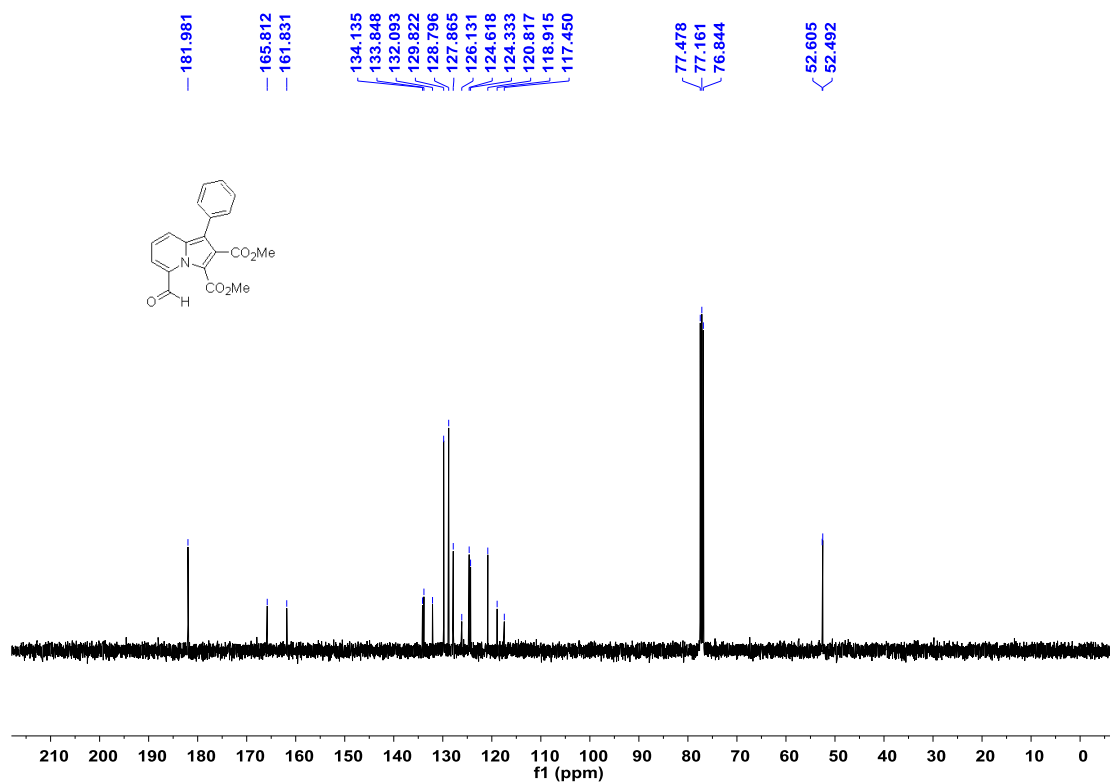

# HRMS

20220921-ssm-7-pos 26 (0.121)

1: TOF MS ES+  
1.25e5

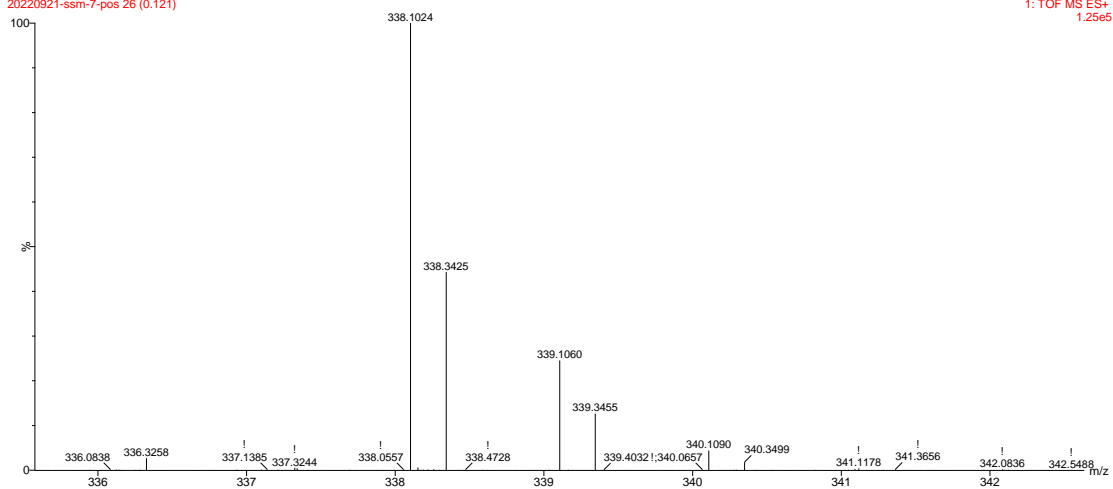

**Dimethyl (*E*)-5-(3-ethoxy-2-methyl-3-oxoprop-1-en-1-yl)-1-phenylindolizine-2,3-dicarboxylate (9)**

**<sup>1</sup>H NMR (400MHz, CDCl<sub>3</sub>)**

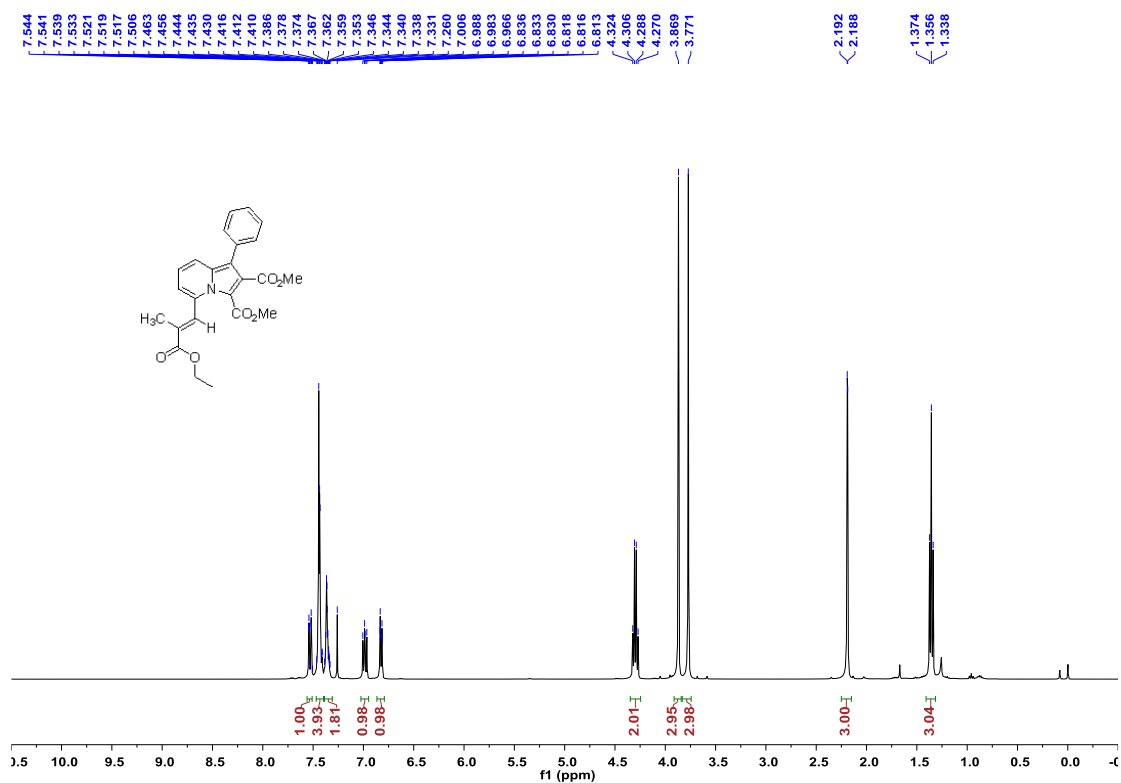

**<sup>13</sup>C NMR (101MHz, CDCl<sub>3</sub>)**

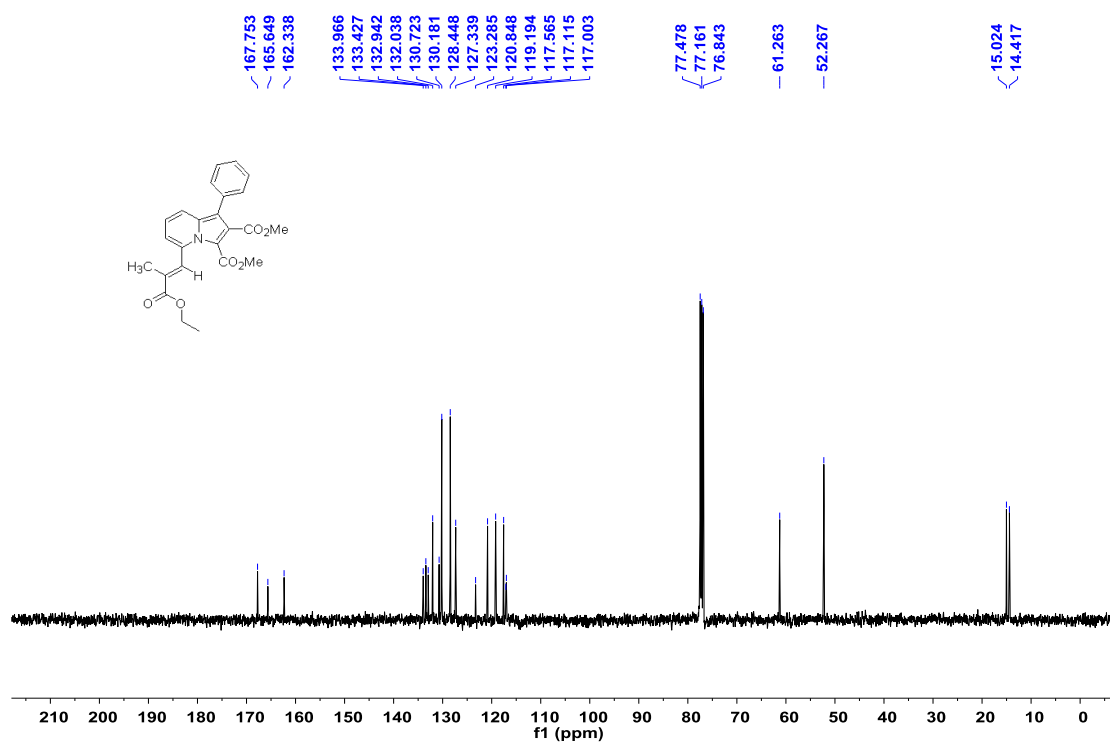

# HRMS

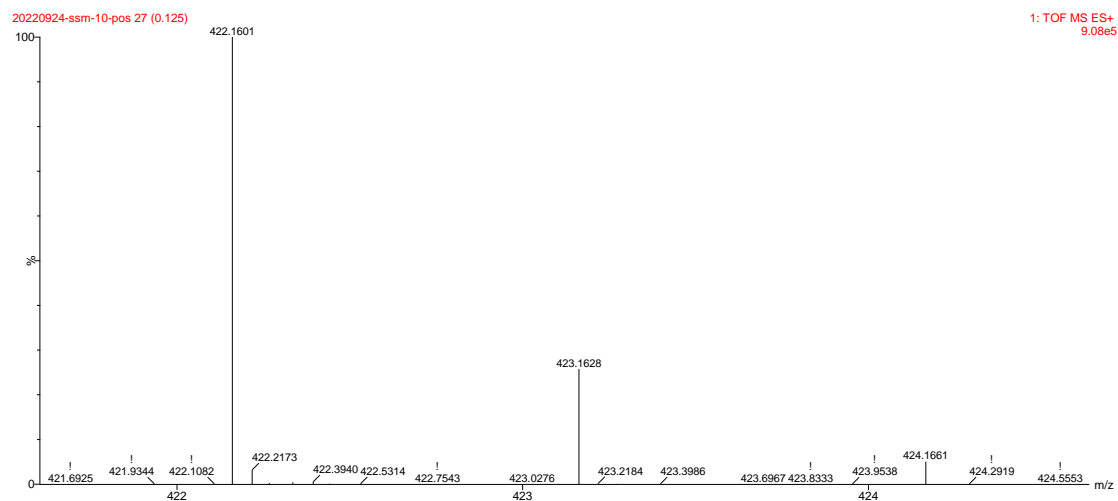

## 4.6. Copies of $^1\text{H}$ , $^{13}\text{C}$ NMR and HRMS Spectra of Control Experiments

### Benzhydryl(phenyl)phosphinic diphenylphosphinothioic anhydride (6)

#### $^1\text{H}$ NMR (400MHz, $\text{CDCl}_3$ )

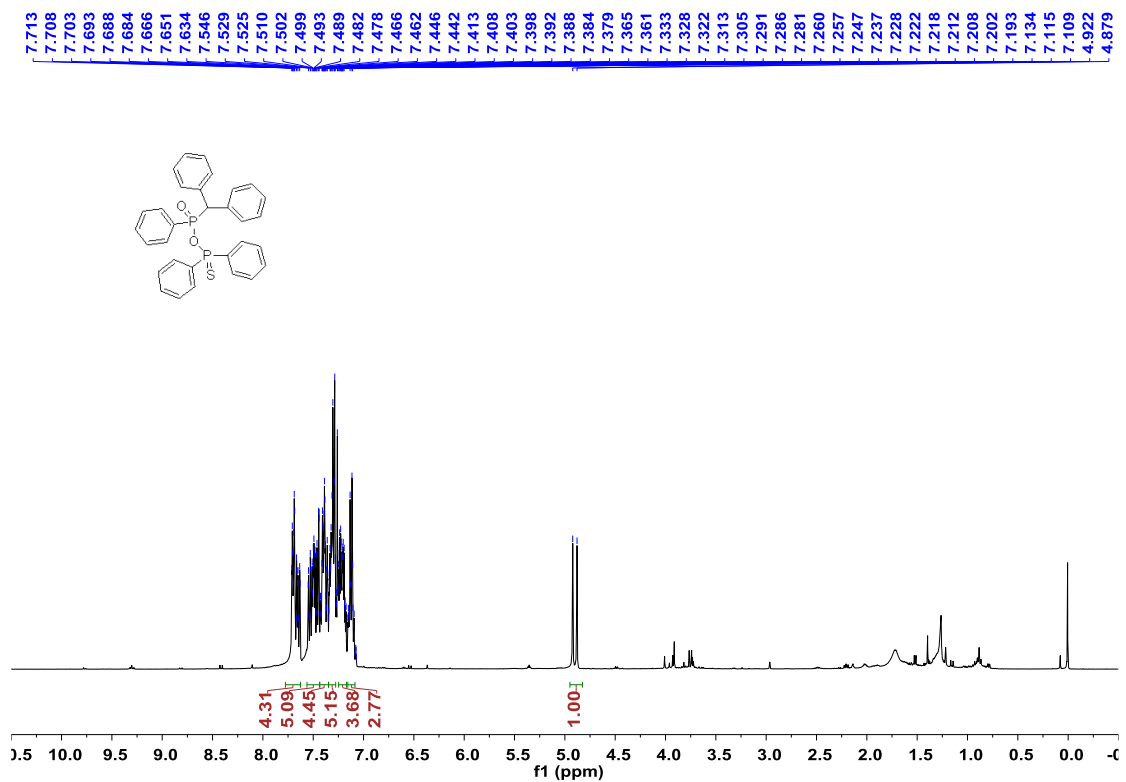

#### $^{31}\text{P}$ NMR (162 MHz, $\text{CDCl}_3$ )

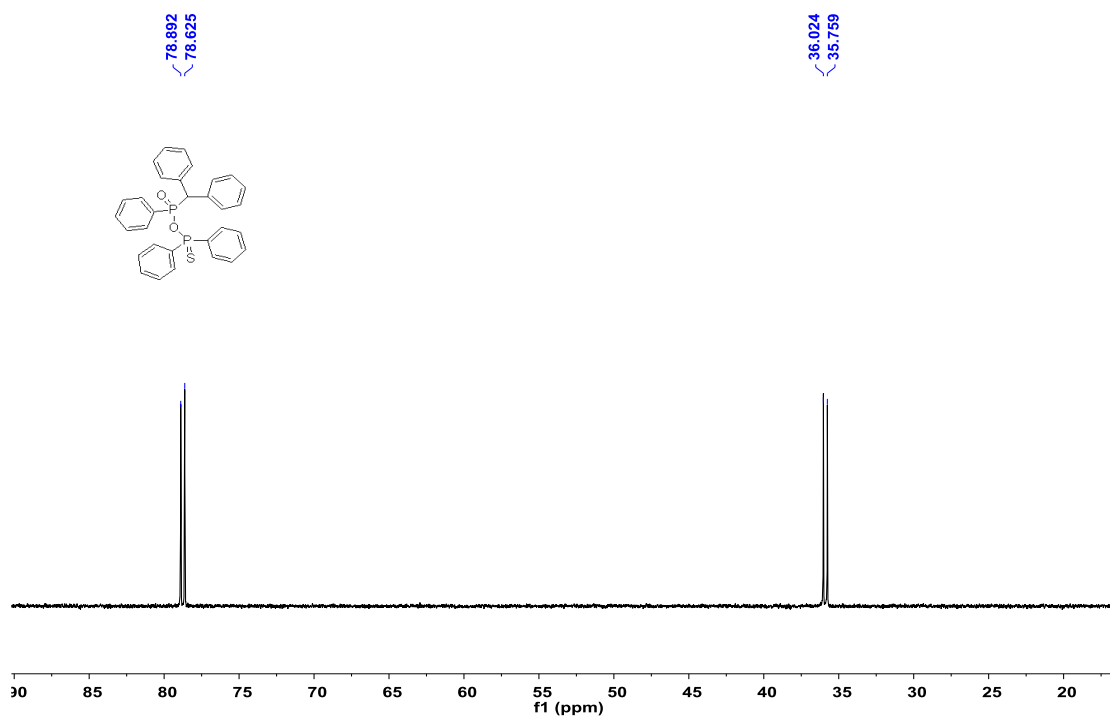

### <sup>13</sup>C NMR (101MHz, CDCl<sub>3</sub>)

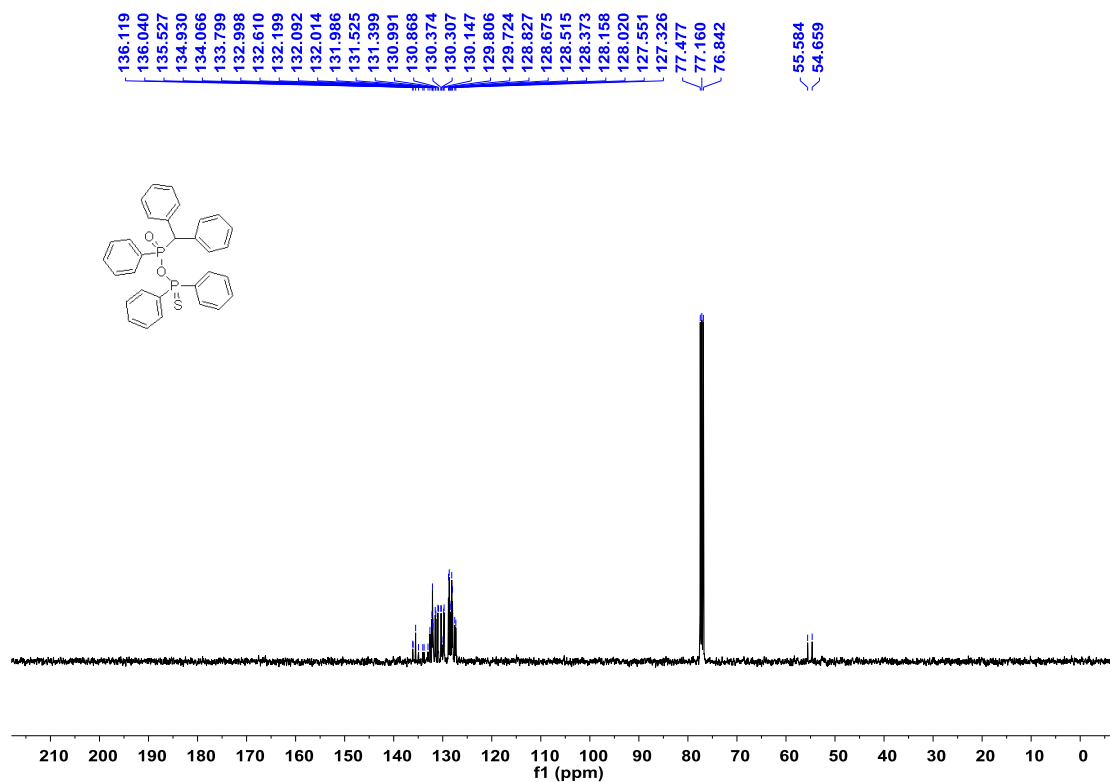

### HRMS

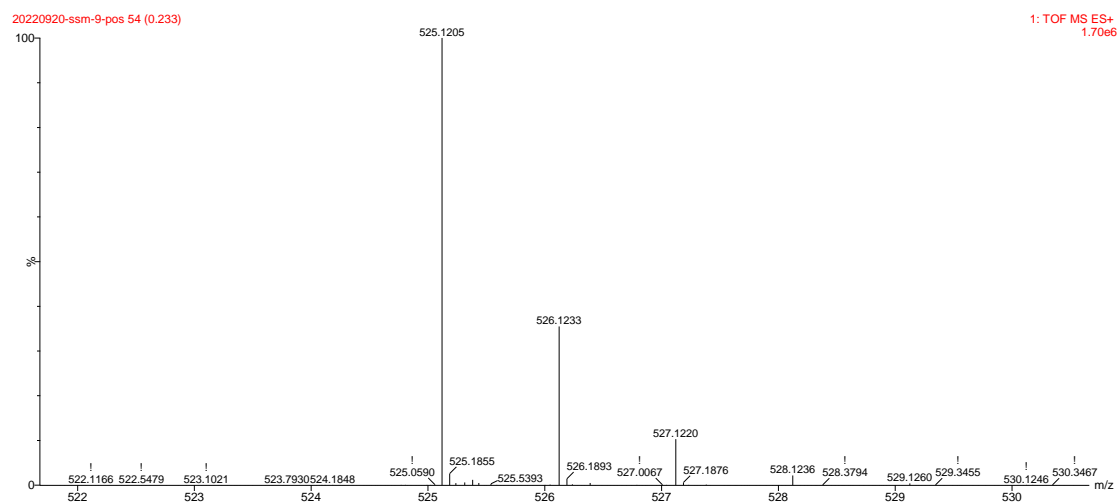



## 5. X-Ray Crystallographic Data of 3aa and 4ag

### 5.1. X-Ray Crystallographic Data of 3aa

#### Experimental

Single crystals of C<sub>25</sub>H<sub>21</sub>O<sub>5</sub>PS [**3aa**] were recrystallized from dichloromethane and diethyl ether. One crystal was mounted in inert oil and transferred to the cold gas stream of the diffractometer.

#### Crystal Structure Determination of 3aa

**Crystal Data.** C<sub>25</sub>H<sub>21</sub>O<sub>5</sub>PS, *M*=464.45, monoclinic, *a* = 9.9928(5) Å, *b* = 17.2209(6) Å, *c* = 13.4103(5) Å,  $\beta$  = 105.451(4)°, *U* = 2224.31(16) Å<sup>3</sup>, *T* = 114.85(10), space group P2<sub>1</sub>/c (no. 14), *Z* = 4,  $\mu$ (Mo K $\alpha$ ) = 0.253, 18570 reflections measured, 4339 unique (*R*<sub>int</sub> = 0.0643) which were used in all calculations. The final *wR*(*F*<sub>2</sub>) was 0.1054 (all data)

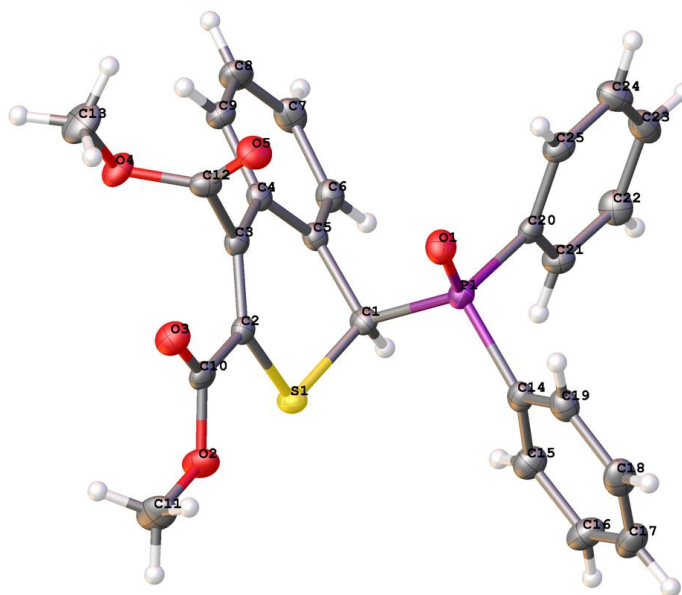

Figure S1. X-Ray Structure of 3aa (50% probability)

**Table S1: Crystal Data and Structure Refinement for 3aa**

|                                                                         |                                                   |
|-------------------------------------------------------------------------|---------------------------------------------------|
| Identification code                                                     | exp_7669                                          |
| Empirical formula                                                       | C <sub>25</sub> H <sub>21</sub> O <sub>5</sub> PS |
| Formula weight                                                          | 464.45                                            |
| Temperature / K                                                         | 114.85(10)                                        |
| Crystal system                                                          | monoclinic                                        |
| Space group                                                             | P2 <sub>1</sub> /c                                |
| a / Å, b / Å, c / Å                                                     | 9.9928(5), 17.2209(6), 13.4103(5)                 |
| α/°, β/°, γ/°                                                           | 90.00, 105.451(4), 90.00                          |
| Volume / Å <sup>3</sup>                                                 | 2224.31(16)                                       |
| Z                                                                       | 4                                                 |
| ρ <sub>calc</sub> / mg mm <sup>-3</sup>                                 | 1.387                                             |
| μ / mm <sup>-1</sup>                                                    | 0.253                                             |
| F(000)                                                                  | 968                                               |
| Crystal size / mm <sup>3</sup>                                          | 0.38 × 0.21 × 0.19                                |
| 2θ range for data collection                                            | 6.3 to 52°                                        |
| Index ranges                                                            | -12 ≤ h ≤ 10, -21 ≤ k ≤ 21, -16 ≤ l ≤ 16          |
| Reflections collected                                                   | 18570                                             |
| Independent reflections                                                 | 4339[R(int) = 0.0643 (inf-0.9Å)]                  |
| Data/restraints/parameters                                              | 4339/0/291                                        |
| Goodness-of-fit on F <sup>2</sup>                                       | 1.048                                             |
| Final R indexes [I > 2σ (I) i.e. F <sub>o</sub> > 4σ (F <sub>o</sub> )] | R <sub>1</sub> = 0.0458, wR <sub>2</sub> = 0.0935 |
| Final R indexes [all data]                                              | R <sub>1</sub> = 0.0684, wR <sub>2</sub> = 0.1054 |
| Largest diff. peak/hole / e Å <sup>-3</sup>                             | 0.400/-0.357                                      |
| Flack Parameters                                                        | N                                                 |
| Completeness                                                            | 0.9976                                            |

## 5.2. X-Ray Crystallographic Data of 4ag

### Experimental

Single crystals of C<sub>19</sub>H<sub>17</sub>NO<sub>4</sub>PS [4ag] were recrystallized from petroleum ether (60–90 °C fraction) and ethyl acetate. One crystal was mounted in inert oil and transferred to the cold gas stream of the diffractometer.

### Crystal Structure Determination of 4ag

**Crystal Data.** C<sub>19</sub>H<sub>17</sub>NO<sub>4</sub>,  $M = 323.34$ , orthorhombic,  $a = 38.4079(16)$  Å,  $b = 10.3454(5)$  Å,  $c = 7.9044(4)$  Å,  $U = 3140.8(2)$  Å<sup>3</sup>,  $T = 112.85(10)$ , space group Pbc<sub>a</sub> (no. 61),  $Z = 8$ ,  $\mu(\text{Mo K}\alpha) = 0.096$ , 12029 reflections measured, 3052 unique ( $R_{\text{int}} = 0.0496$ ) which were used in all calculations. The final  $wR(F_2)$  was 0.1135 (all data).

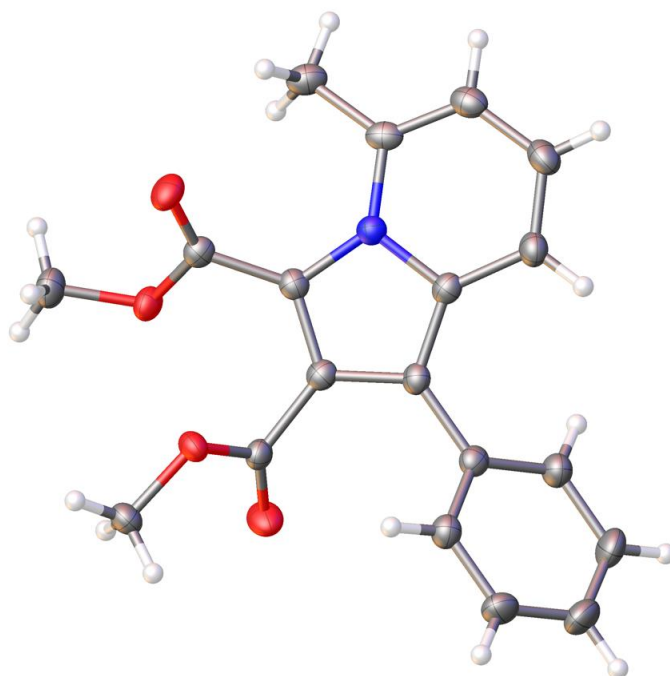

Figure S2. X-Ray Structure of 4ag (50% probability)

**Table S2: Crystal Data and Structure Refinement for 4ag****Table 1:** Crystal data and structure refinement for exp\_8106

|                                                                         |                                                   |
|-------------------------------------------------------------------------|---------------------------------------------------|
| Identification code                                                     | exp_8106                                          |
| Empirical formula                                                       | C <sub>19</sub> H <sub>17</sub> NO <sub>4</sub>   |
| Formula weight                                                          | 323.34                                            |
| Temperature / K                                                         | 112.85(10)                                        |
| Crystal system                                                          | orthorhombic                                      |
| Space group                                                             | Pbca                                              |
| a / Å, b / Å, c / Å                                                     | 38.4079(16), 10.3454(5), 7.9044(4)                |
| α/°, β/°, γ/°                                                           | 90.00, 90.00, 90.00                               |
| Volume / Å <sup>3</sup>                                                 | 3140.8(2)                                         |
| Z                                                                       | 8                                                 |
| ρ <sub>calc</sub> / mg mm <sup>-3</sup>                                 | 1.368                                             |
| μ / mm <sup>-1</sup>                                                    | 0.096                                             |
| F(000)                                                                  | 1360                                              |
| Crystal size / mm <sup>3</sup>                                          | 0.24 × 0.23 × 0.22                                |
| 2θ range for data collection                                            | 6.58 to 52°                                       |
| Index ranges                                                            | -34 ≤ h ≤ 46, -10 ≤ k ≤ 12, -9 ≤ l ≤ 8            |
| Reflections collected                                                   | 12029                                             |
| Independent reflections                                                 | 3052[R(int) = 0.0496 (inf-0.9Å)]                  |
| Data/restraints/parameters                                              | 3052/0/220                                        |
| Goodness-of-fit on F <sup>2</sup>                                       | 1.084                                             |
| Final R indexes [I > 2σ (I) i.e. F <sub>o</sub> > 4σ (F <sub>o</sub> )] | R <sub>1</sub> = 0.0496, wR <sub>2</sub> = 0.1021 |
| Final R indexes [all data]                                              | R <sub>1</sub> = 0.0676, wR <sub>2</sub> = 0.1135 |
| Largest diff. peak/hole / e Å <sup>-3</sup>                             | 0.212/-0.216                                      |
| Flack Parameters                                                        | N                                                 |
| Completeness                                                            | 0.9936                                            |
